# Supplementary material
Source: PubMed Central journal article supplement (PMC8817233)
Supplement: NIHMS1736971-supplement-Supplementary_Material.pdf [file NIHMS1736971-supplement-Supplementary_Material.pdf]

## Supporting Information

### Discovery of an Orally Bioavailable Small-Molecule Inhibitor for the $\beta$ -Catenin/B-Cell Lymphoma 9 Protein–Protein Interaction

Zhen Wang,<sup>+</sup> Min Zhang,<sup>+</sup> Victor Quereda,<sup>+</sup> Sylvia M. Frydman, Qianqian Ming, Vincent C. Luca, Derek R. Duckett,\* Haitao Ji\*

Drug Discovery Department, H. Lee Moffitt Cancer Center and Research Institute, Tampa, Florida 33612–9497, United States

\*Derek R. Duckett: Derek.Duckett@moffitt.org, Tel: 813-745-5410

\*Haitao Ji: Haitao.Ji@moffitt.org, Tel: 813-745-8070

<sup>†</sup>Z.W., M.Z., and V.Q. contributed equally to this work.

#### Table of Contents

|                                 |         |
|---------------------------------|---------|
| Supplementary Figure S1.....    | S2      |
| Supplementary Figure S2.....    | S3      |
| Supplementary Figure S3.....    | S3      |
| Supplementary Figure S4.....    | S4      |
| Supplementary Figure S5.....    | S4      |
| Supplementary Figure S6.....    | S5      |
| Supplementary Figure S7.....    | S5      |
| Supplementary Figure S8.....    | S6      |
| Supplementary Figure S9.....    | S7      |
| Supplementary Figure S10.....   | S8      |
| Supplementary Figure S11.....   | S9      |
| Supplementary Figure S12.....   | S9      |
| Supplementary Figure S13.....   | S10     |
| Supplementary Figure S14.....   | S10     |
| Supplementary Figure S15.....   | S11     |
| Supplementary Figure S16.....   | S11     |
| Supplementary Figure S17.....   | S12     |
| Supplementary Figure S18.....   | S12     |
| Supplementary Figure S19.....   | S12     |
| HPLC Conditions and Traces..... | S13-S26 |
| NMR Spectra.....                | S27-S49 |
| Original FACS data.....         | S49-S61 |

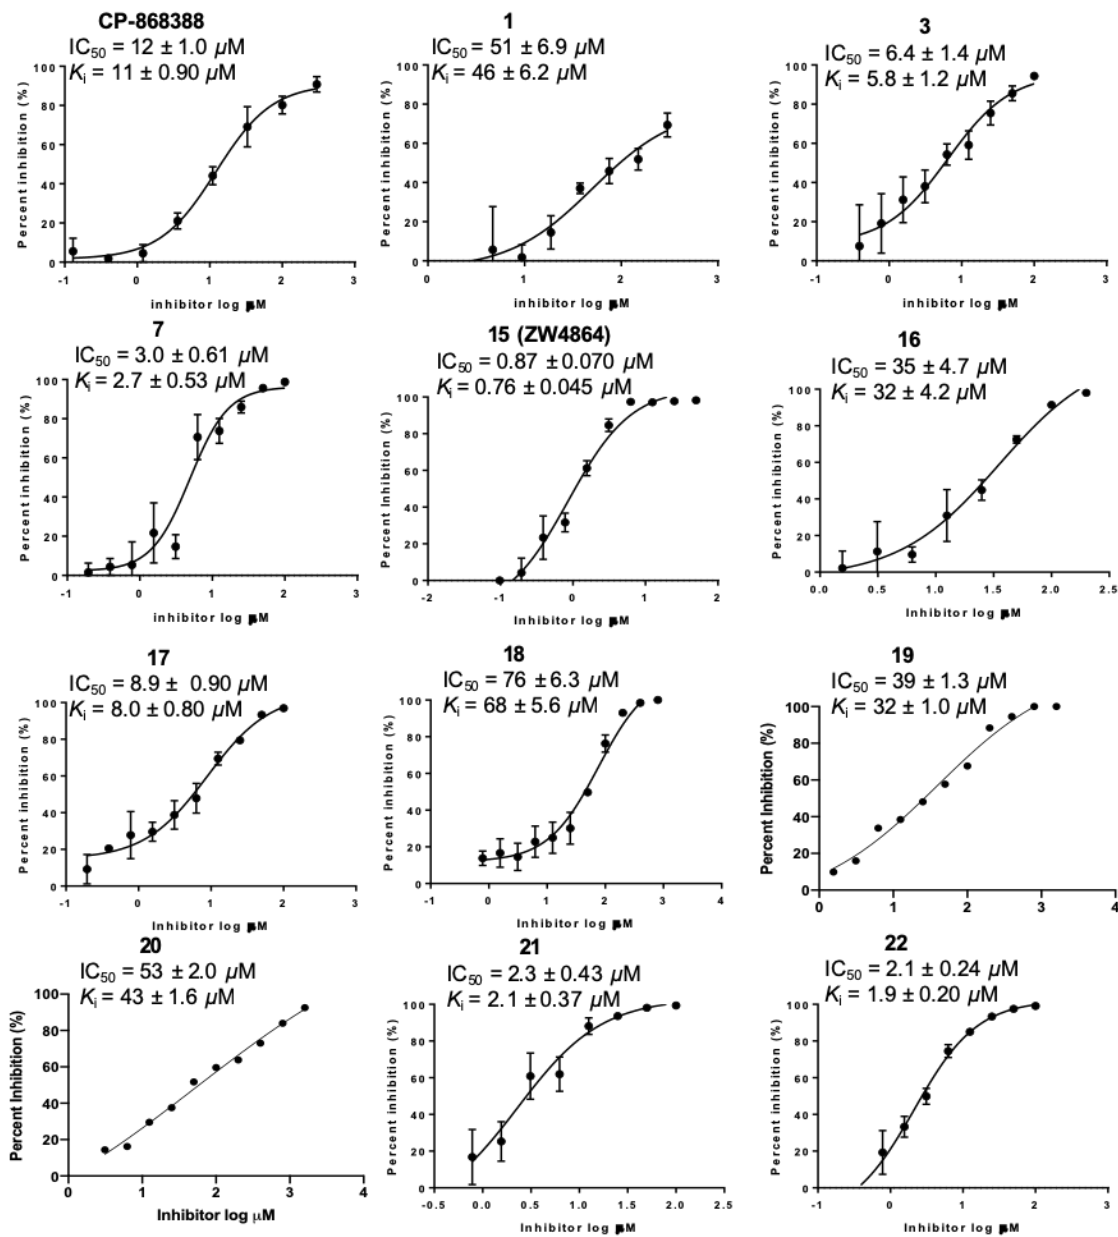

**Supplementary Figure S1.** The dose-response curves of AlphaScreen assays of CP-868388, 1, 3, 7, 15 (ZW4864), and 16–22 for disruption of the full-length  $\beta$ -catenin/BCL9 PPI. Each set of data is expressed as mean  $\pm$  standard deviation ( $n = 3$ ).

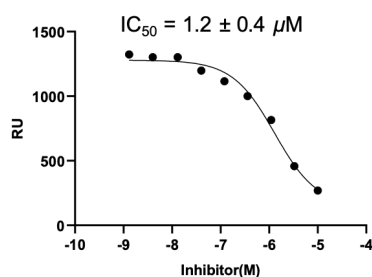

**Supplementary Figure S2.** The fitting curve that derives the  $IC_{50}$  of SPR competitive inhibition assay for disruption of  $\beta$ -catenin/BCL9 PPI. The concentrations of **ZW4864** for curve fitting are 30, 10, 1.1, 0.36, 0.12, 0.04, 0.013, 0.004, and 0.0013  $\mu$ M, respectively.

AlphaScreen competitive binding assays  
full-length  $\beta$ -catenin/**Biotin-ZW4864**

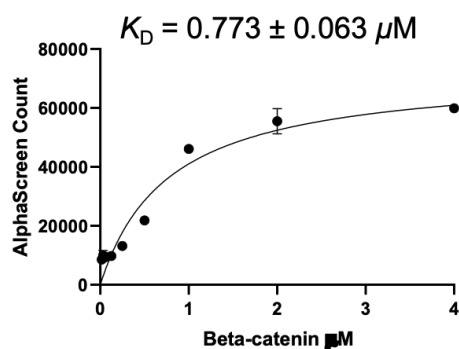

**Supplementary Figure S3.** The  $K_D$  of **Biotin-ZW4864** with full-length  $\beta$ -catenin in AlphaScreen saturation binding assays. Increasing concentrations of His<sub>6</sub>-tagged full-length  $\beta$ -catenin were incubated with 10 nM **Biotin-ZW4864** for 1 h. Donor and acceptor beads were then added into each well to a final concentration of 20  $\mu$ g/mL in a 25  $\mu$ L assay volume. The plate was read after 2 h incubation. Each experiment was performed in triplicate. Data are expressed as mean  $\pm$  standard deviation (n = 3).

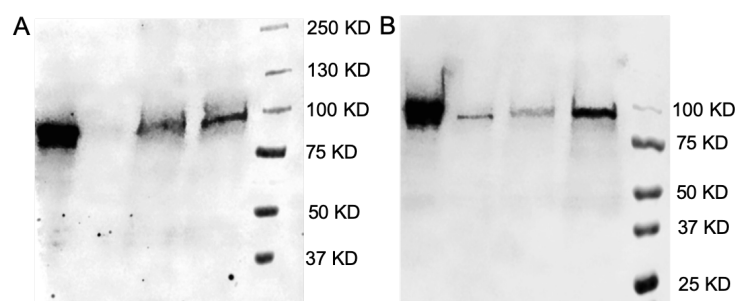

The normalized densities of the images of the protein pull-down experiment.

| ZW4864, $\mu\text{M}$ | full-length $\beta$ -catenin | SW480 cell lysates |
|-----------------------|------------------------------|--------------------|
| Input                 | 1.00                         | 1.00               |
| 0                     | $0.01 \pm 0.05$              | $0.07 \pm 0.04$    |
| 1                     | $0.10 \pm 0.03$              | $0.05 \pm 0.03$    |
| 10                    | $0.28 \pm 0.07$              | $0.29 \pm 0.05$    |

**Supplementary Figure S4.** Uncropped Western blot gels for the pull-down experiments of **Biotin-ZW4864** using (A) purified full-length human  $\beta$ -catenin. and (B) SW480 cell lysates.

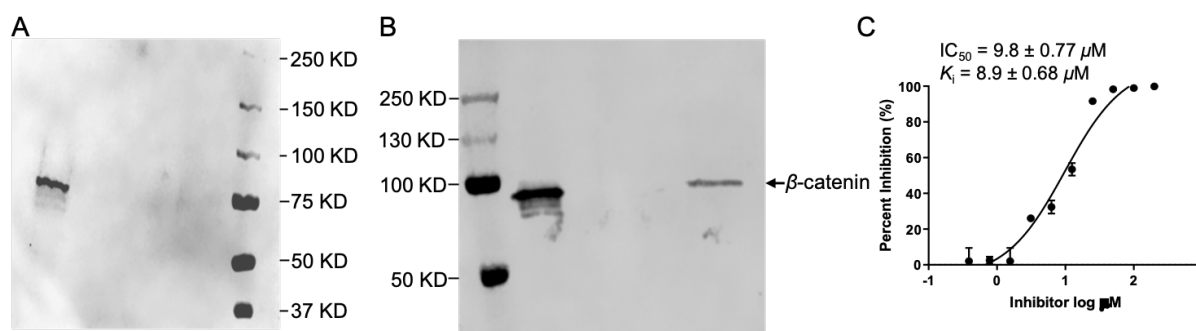

The normalized densities of the images of the protein pull-down experiment.

| ZW4864, $\mu\text{M}$ | RIC             | ZW4864, $\mu\text{M}$ | RIC             |
|-----------------------|-----------------|-----------------------|-----------------|
| Input                 | 1.00            | Input                 | 1.00            |
| 0                     | $0.01 \pm 0.01$ | 0                     | $0.03 \pm 0.01$ |
| 1                     | $0.03 \pm 0.02$ | 5                     | $0.07 \pm 0.01$ |
| 10                    | $0.04 \pm 0.02$ | 50                    | $0.27 \pm 0.06$ |

**Supplementary Figure S5.** Uncropped Western blot gels for the pull-down experiments of **Biotin-ZW4864** at (A) 1 and 10  $\mu\text{M}$ , (B) 5 and 50  $\mu\text{M}$  using  $\beta$ -catenin RIC (residue 138–781). (C) AlphaScreen assay results of **ZW4864** for disruption of  $\beta$ -catenin RIC/BCL9 PPI. Each set of data is expressed as mean  $\pm$  standard deviation (n = 3).

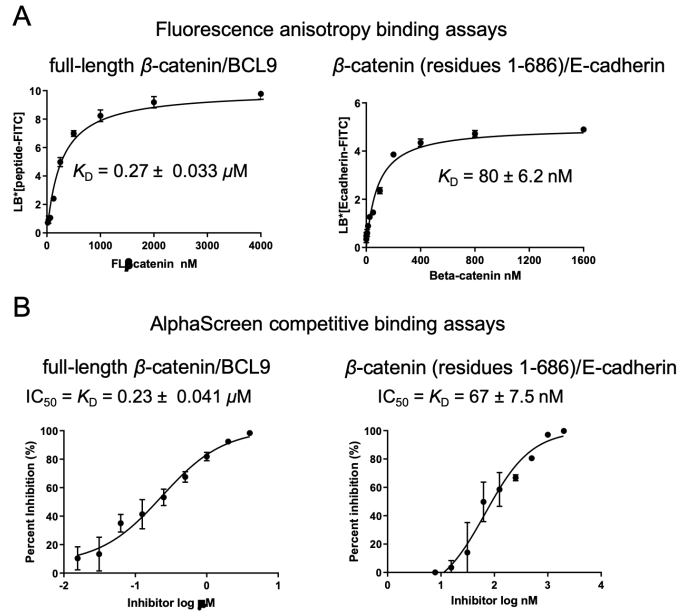

**Supplementary Figure S6.** The  $K_D$ s of full-length  $\beta$ -catenin with BCL9 HD2 peptide (residues 350–375) and the  $K_D$ s of  $\beta$ -catenin (residues 1-686) with E-cadherin peptide (residues 824–877) using (A) fluorescence anisotropy binding assays and (B) AlphaScreen competitive binding assays. Each set of data is expressed as mean  $\pm$  standard deviation ( $n = 3$ ).

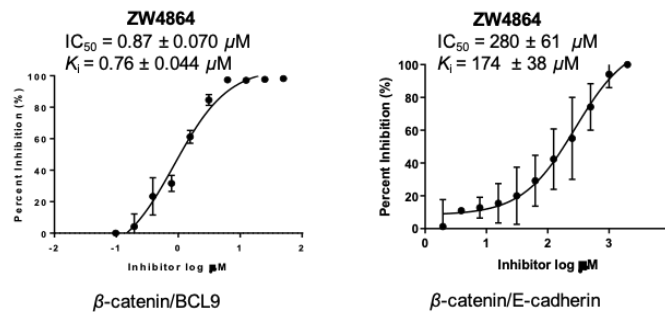

**Supplementary Figure S7.** AlphaScreen selectivity assay results of **ZW4864** for disruption of full-length  $\beta$ -catenin/BCL9 and full-length  $\beta$ -catenin/E-cadherin PPIs. Each set of data is expressed as mean  $\pm$  standard deviation ( $n = 3$ ).

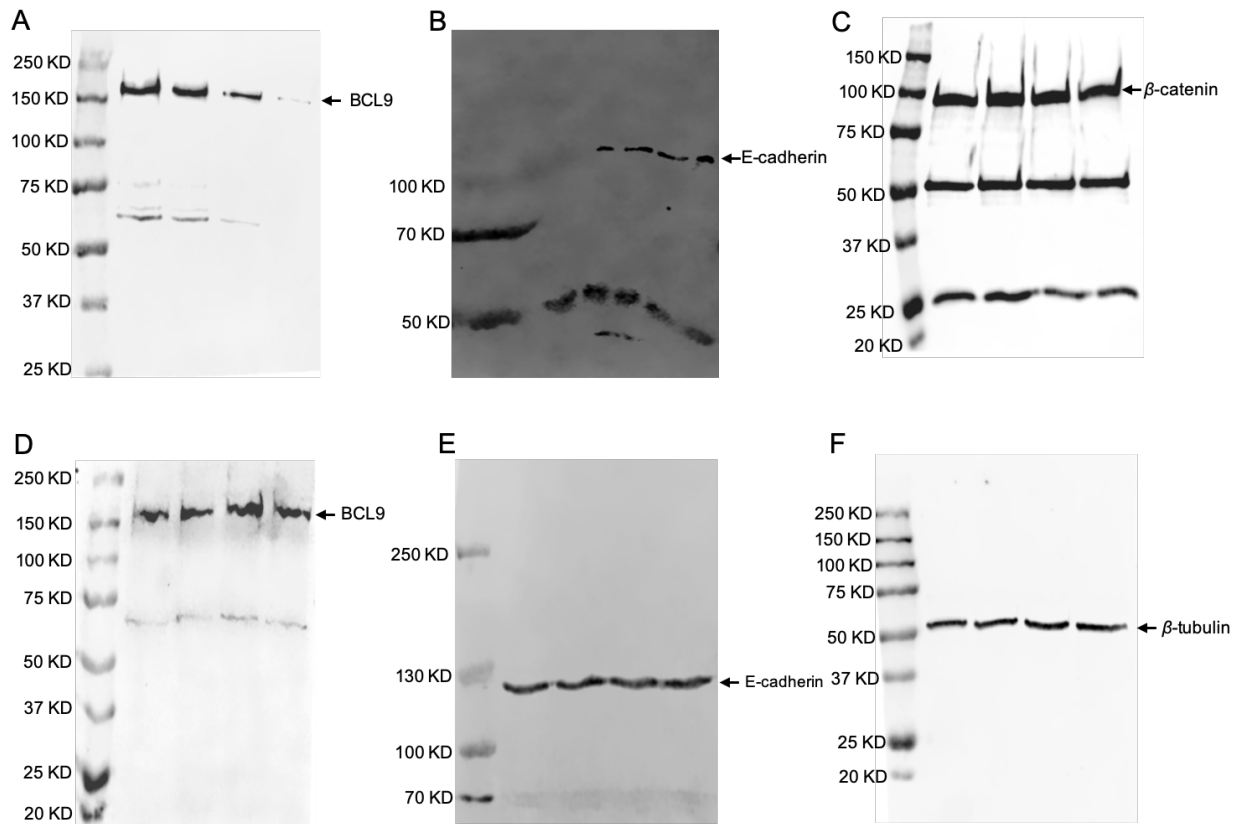

The normalized densities of the images of the co-IP assays.

| ZW4864, $\mu\text{M}$ | IP: $\beta$ -catenin<br>IB: BCL9 | IP: $\beta$ -catenin<br>IB: E-cadherin | IP: $\beta$ -catenin<br>IB: $\beta$ -catenin | Input:<br>E-cadherin | Input:<br>BCL9  | Input:<br>$\beta$ -tubulin |
|-----------------------|----------------------------------|----------------------------------------|----------------------------------------------|----------------------|-----------------|----------------------------|
| 0                     | 1.0                              | 1.0                                    | 1.0                                          | 1.0                  | 1.0             | 1.0                        |
| 10                    | $0.73 \pm 0.06$                  | $1.10 \pm 0.05$                        | $1.05 \pm 0.08$                              | $1.10 \pm 0.04$      | $1.03 \pm 0.05$ | $1.05 \pm 0.08$            |
| 20                    | $0.42 \pm 0.05$                  | $1.05 \pm 0.08$                        | $0.99 \pm 0.08$                              | $1.05 \pm 0.06$      | $1.11 \pm 0.09$ | $1.10 \pm 0.06$            |
| 40                    | $0.20 \pm 0.03$                  | $1.15 \pm 0.10$                        | $0.95 \pm 0.06$                              | $1.10 \pm 0.09$      | $1.02 \pm 0.07$ | $1.06 \pm 0.05$            |

**Supplementary Figure S8.** Uncropped Western blot gels for the co-IP experiments to evaluate effects of ZW4864 for disruption of the  $\beta$ -catenin/ BCL9 PPI and selectivity for  $\beta$ -catenin/BCL9 over  $\beta$ -catenin/E-cadherin PPIs. (A)  $\beta$ -Catenin immunoprecipitation (IP) and then BCL9 immunoblotting (IB); (B)  $\beta$ -catenin IP and then E-cadherin IB; (C)  $\beta$ -catenin IP and then  $\beta$ -catenin IB; (D) BCL9 IB as the input; (E) E-cadherin IB as the input; and (F)  $\beta$ -tubulin IB as the input.

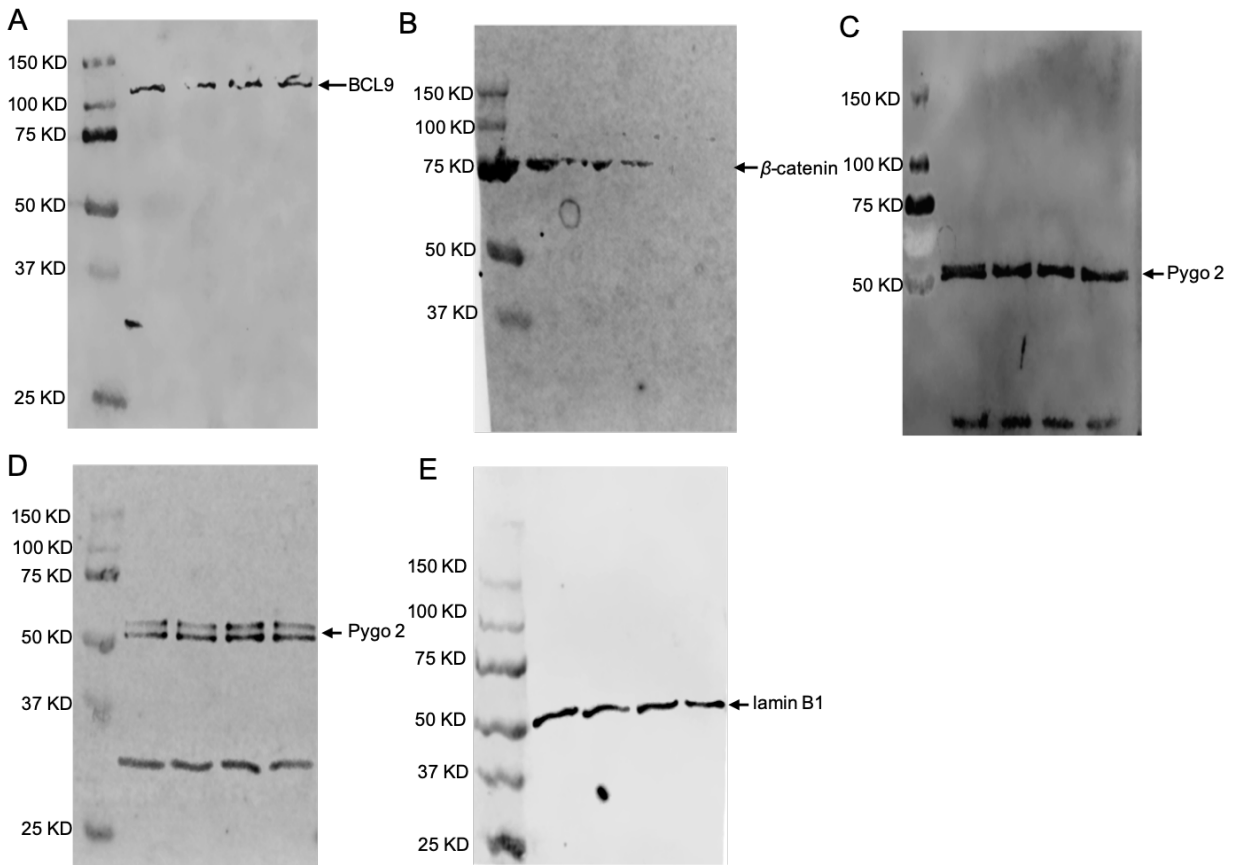

The normalized densities of the images of co-IP experiments to evaluate effects of **ZW4864** for disruption of BCL9/Pygo and  $\beta$ -catenin/Pygo interactions.

| <b>ZW4864, <math>\mu</math>M</b> | IP: Pygo2<br>IB: BCL9 | IP: Pygo2<br>IB: $\beta$ -catenin | IP: Pygo2<br>IB: Pygo2 | Input:<br>Pygo2 | Input:<br>lamin B1 |
|----------------------------------|-----------------------|-----------------------------------|------------------------|-----------------|--------------------|
| 0                                | 1.0                   | 1.0                               | 1.0                    | 1.0             | 1.0                |
| 10                               | 0.91 $\pm$ 0.06       | 0.69 $\pm$ 0.05                   | 1.05 $\pm$ 0.05        | 1.06 $\pm$ 0.06 | 0.92 $\pm$ 0.05    |
| 20                               | 1.01 $\pm$ 0.07       | 0.36 $\pm$ 0.04                   | 1.05 $\pm$ 0.06        | 1.19 $\pm$ 0.08 | 0.96 $\pm$ 0.07    |
| 40                               | 1.07 $\pm$ 0.08       | 0.05 $\pm$ 0.01                   | 0.99 $\pm$ 0.07        | 1.07 $\pm$ 0.06 | 0.93 $\pm$ 0.04    |

**Supplementary Figure S9.** Uncropped gels for co-IP experiments to evaluate effects of **ZW4864** for disruption of BCL9/Pygo and  $\beta$ -catenin/Pygo interactions. (A) Pygo 2 immunoprecipitation (IP) and then BCL9 immunoblotting (IB); (B) pygo 2 IP and then  $\beta$ -catenin IB; (C) pygo 2 IP and then pygo 2 IB; (D) pygo 2 as the input; and (E) lamin B1 as the input.

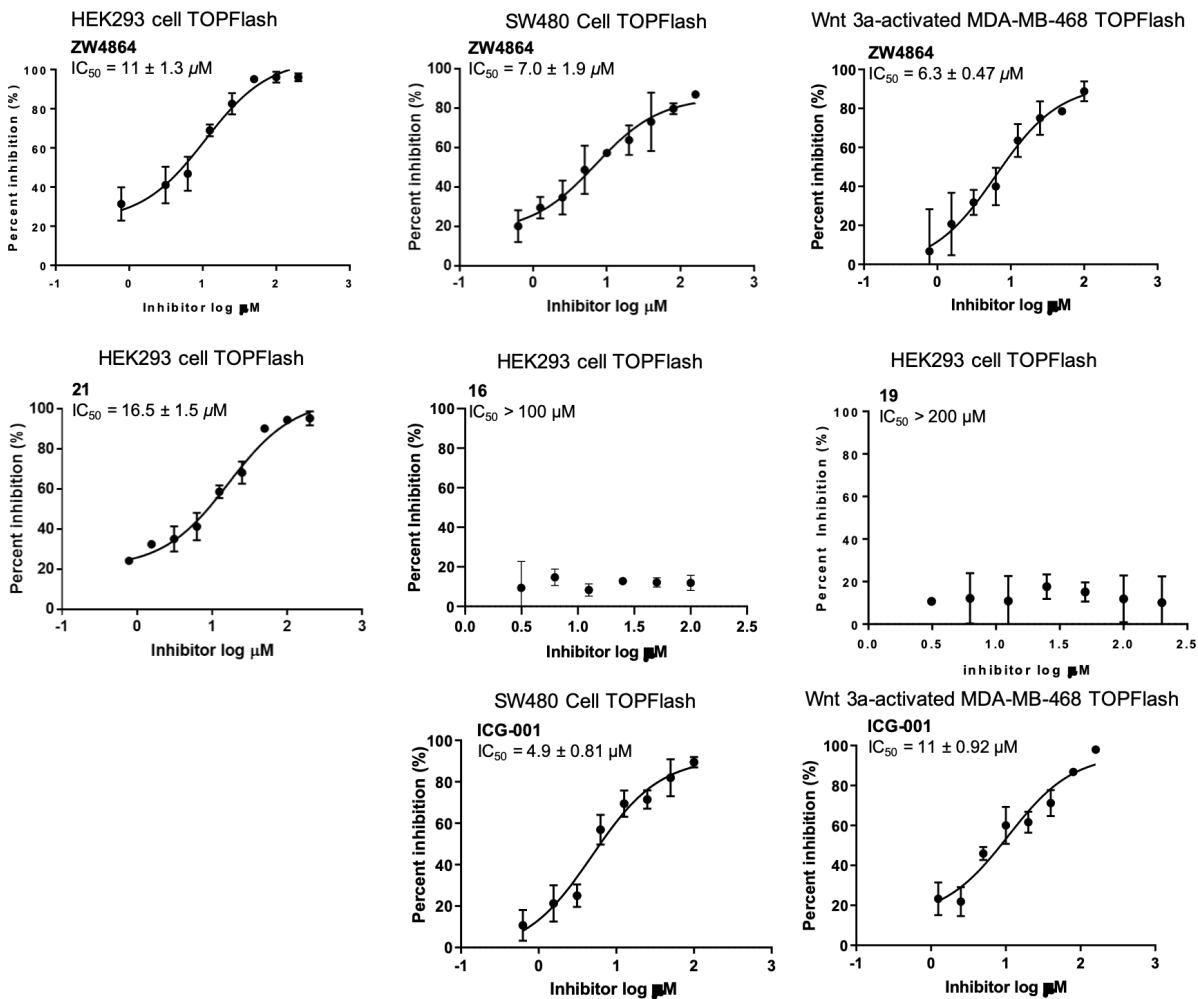

**Supplementary Figure S10.** The dose-response curves of Wnt-responsive TOPFlash luciferase reporter assay results of compounds **ZW4864 (15)**, **21**, **16**, **19** and **ICG-001**.



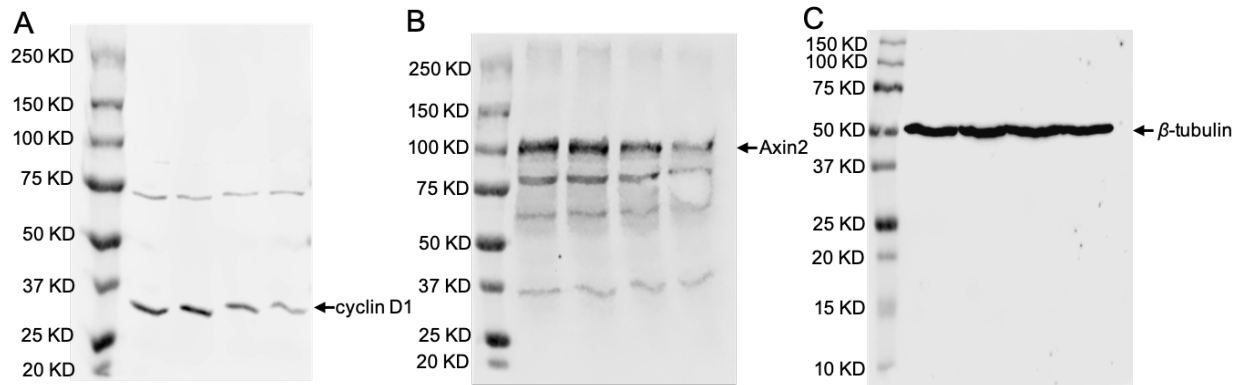

The normalized densities of the images of the Western blot analyses

| ZW4864, $\mu\text{M}$ | Axin2           | cyclin D1       | $\beta$ -tubulin |
|-----------------------|-----------------|-----------------|------------------|
| 0                     | 1.0             | 1.0             | 1.0              |
| 10                    | $1.06 \pm 0.08$ | $1.03 \pm 0.06$ | $1.04 \pm 0.06$  |
| 20                    | $0.62 \pm 0.05$ | $0.56 \pm 0.06$ | $1.02 \pm 0.08$  |
| 40                    | $0.35 \pm 0.04$ | $0.31 \pm 0.05$ | $0.95 \pm 0.07$  |

**Supplementary Figure S11.** Uncropped gels of Western blot experiments of **ZW4864** in SW480 cells, as described in Figure 2G. (A) Cyclin D1; (B) Axin2; and (C)  $\beta$ -tubulin.

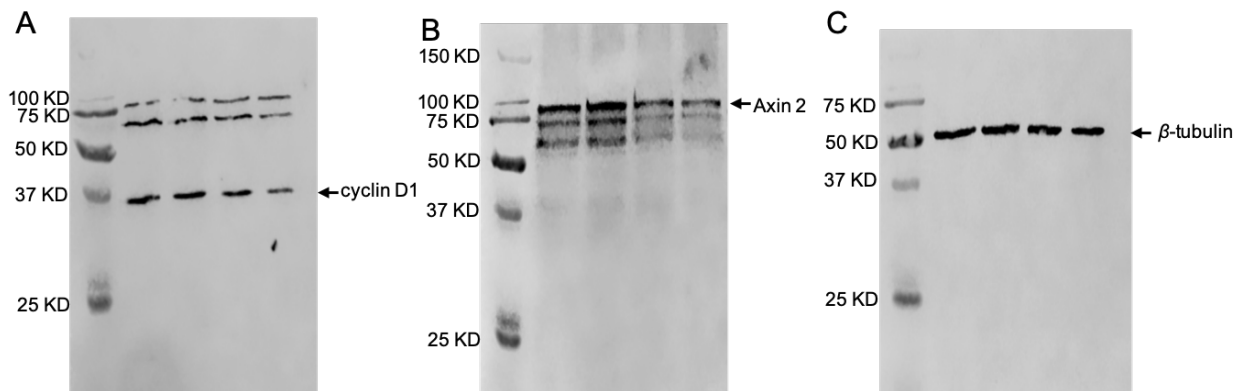

The normalized densities of the images of the Western blot analyses

| ZW4864, $\mu\text{M}$ | Axin2           | cyclin D1       | $\beta$ -tubulin |
|-----------------------|-----------------|-----------------|------------------|
| 0                     | 1.0             | 1.0             | 1.0              |
| 10                    | $1.08 \pm 0.09$ | $0.98 \pm 0.08$ | $0.95 \pm 0.09$  |
| 20                    | $0.57 \pm 0.06$ | $0.67 \pm 0.07$ | $0.92 \pm 0.08$  |
| 40                    | $0.29 \pm 0.04$ | $0.32 \pm 0.05$ | $0.93 \pm 0.08$  |

**Supplementary Figure S12.** Uncropped gels of Western blot experiments of **ZW4864** in Wnt 3a-activated TNBC MDA-MB-231 cells, as described in Figure 2G. (A) Cyclin D1; (B) Axin 2; and (C)  $\beta$ -tubulin.

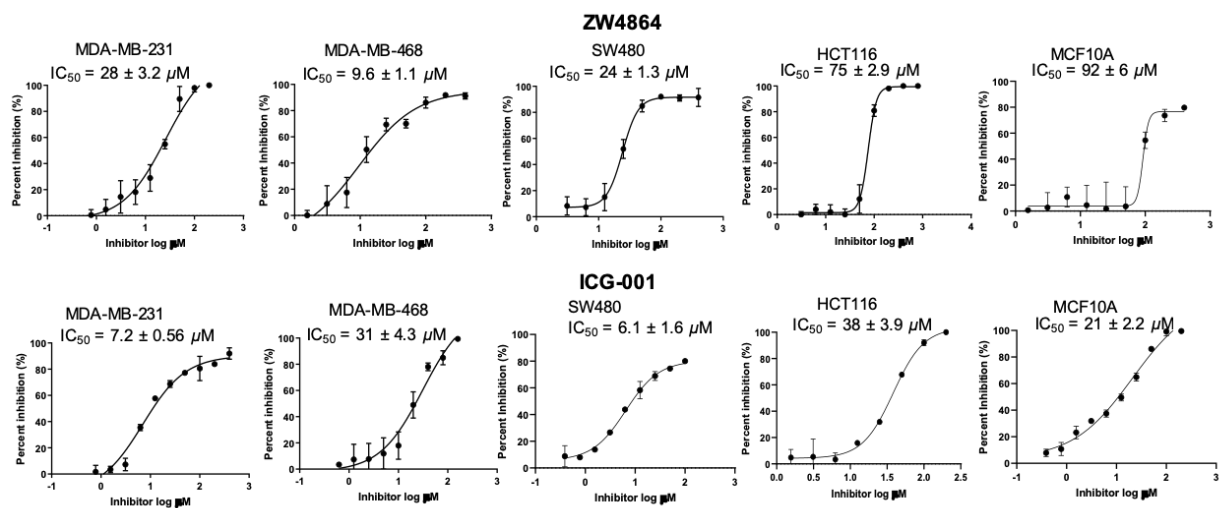

**Supplementary Figure S13.** MTS growth inhibition assay results of **ZW4864** and **ICG-001** against various TNBC cell lines (MDA-MB-231 and MDA-MB-468), colorectal cancer lines (SW480 and HCT116), and normal mammary epithelial MCF10A cell line after 72-h treatment.

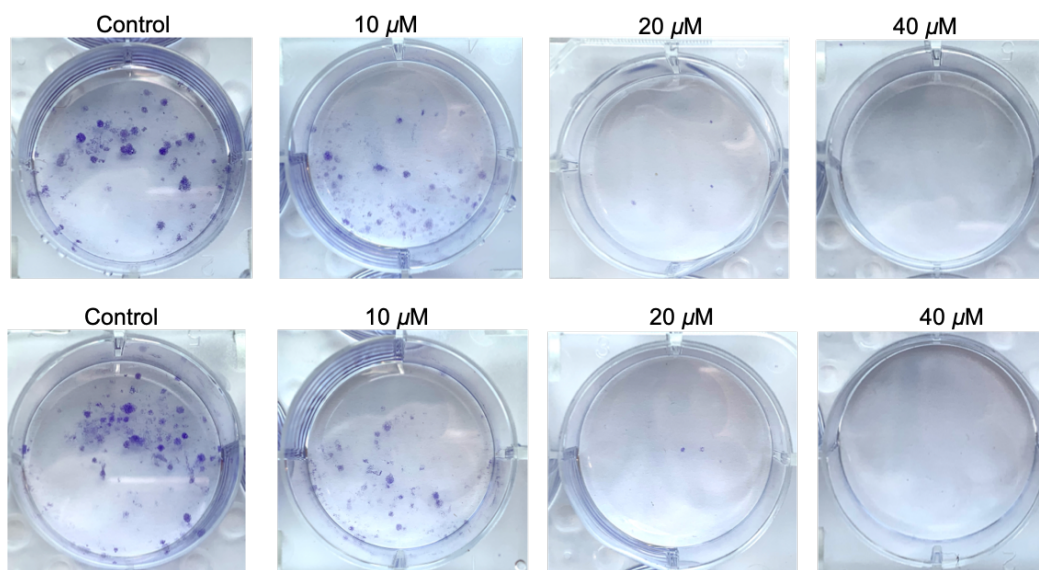

**Supplementary Figure S14.** The clonogenic assay results of **ZW4864** using MDA-MB-231 cells.

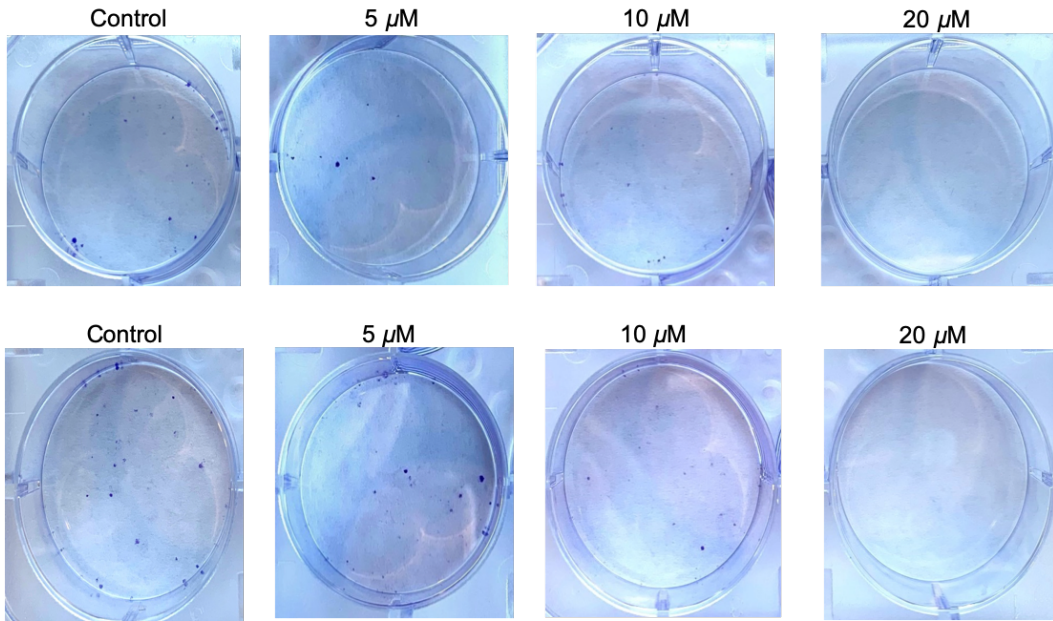

**Supplementary Figure S15.** Clonogenic assay results of **ZW4864** using MDA-MB-468 cells.

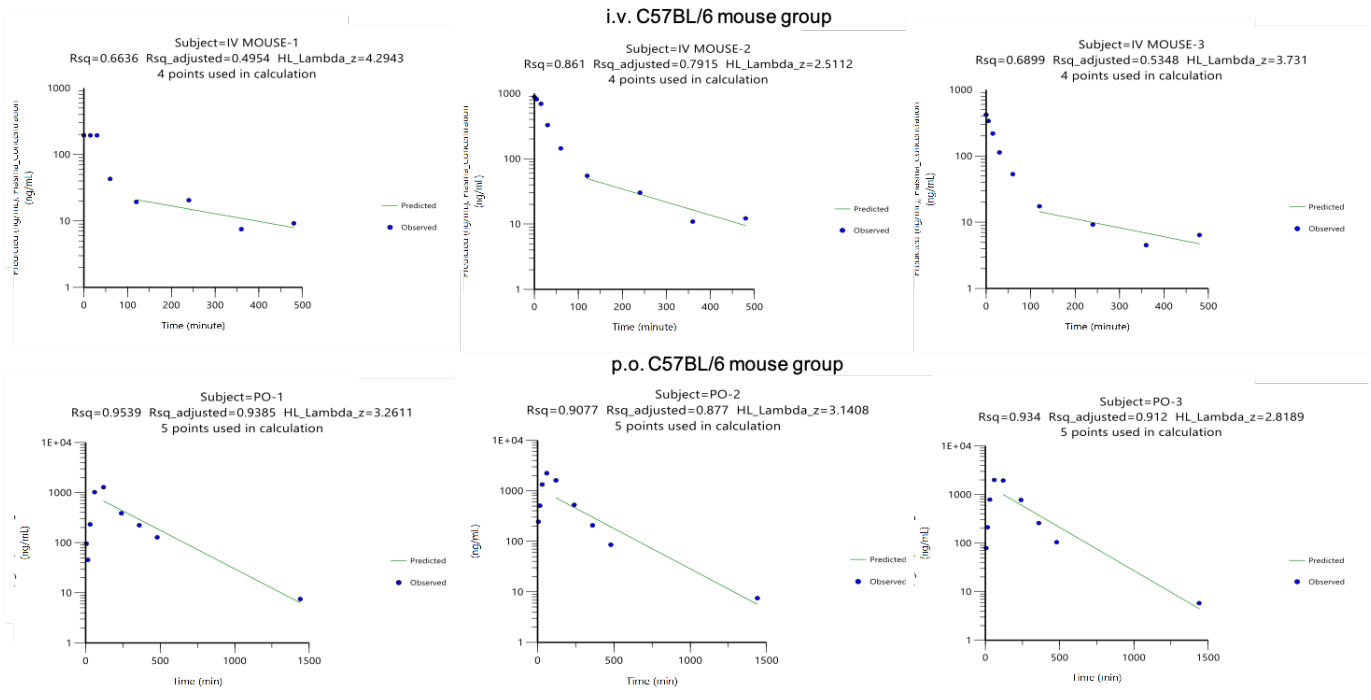

**Supplementary Figure S16.** Original data plots of C57BL/6 mouse PK studies of **ZW4864**.

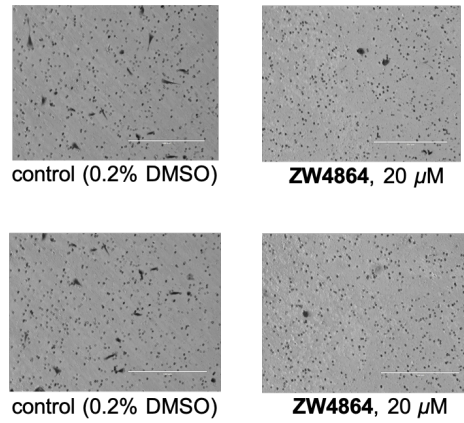

**Supplementary Figure S17.** Original images of the Matrigel invasion assay results of **ZW4864**.

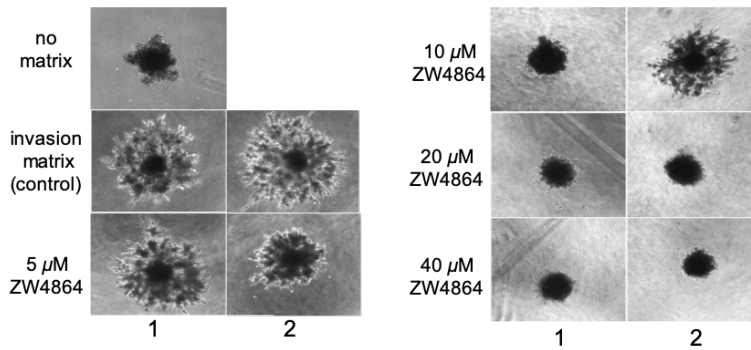

**Supplementary Figure S18.** Original images of 3D spheroid BME cell invasion assays of **ZW4864**.

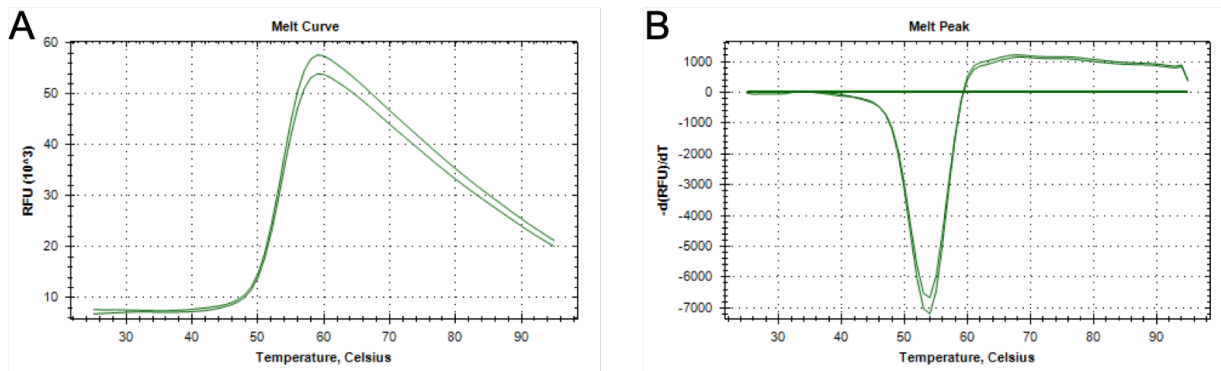

**Supplementary Figure S19.** The quality of full-length  $\beta$ -catenin proteins after purification was examined by thermal shift assays. Here is one example. A temperature increment of  $1^\circ/\text{min}$  was applied.

### HPLC Condition and Traces

The purity of final compounds was determined by HPLC analysis. The instrument was an Agilent 1260 Infinity II HPLC system with a quaternary pump, a vial sampler, and a DAD detector. A Kromasil 300–5–C18 column (4.6 × 250 mm) was used. The DAD detector was set to 254 nm. The purity of all tested compounds was >95%. Some HPLC traces are shown below.

**Condition:** Elute with gradient starting with 0.1% TFA in water and ending with 0.1% TFA in water and acetonitrile mixture (water with 0.1% TFA : acetonitrile = 1 : 1) for 10 min, and then change to a 10 min-gradient starting with 0.1% TFA in water and acetonitrile 1 : 1 mixture and ending with 100% acetonitrile.

| Compound ID          | Purity (%) | Retention time (min) |
|----------------------|------------|----------------------|
| 1                    | 98.6       | 12.48                |
| 2                    | 98.9       | 12.51                |
| 3                    | 97.6       | 10.96                |
| 4                    | 100        | 11.37                |
| 5                    | 98.0       | 11.55                |
| 6                    | 100        | 12.33                |
| 7                    | 100        | 12.15                |
| 8                    | 100        | 12.49                |
| 9                    | 99.4       | 13.42                |
| 10                   | 100        | 12.29                |
| 11                   | 99.4       | 11.90                |
| 12                   | 97.1       | 8.05                 |
| 13                   | 99.2       | 8.21                 |
| 14                   | 98.8       | 13.07                |
| 15                   | 96.8       | 9.35                 |
| 16                   | 98.8       | 9.34                 |
| 17                   | 99.1       | 9.41                 |
| 18                   | 98.0       | 9.86                 |
| 19                   | 98.5       | 9.23                 |
| 20                   | 99.7       | 11.52                |
| 21                   | 99.9       | 8.99                 |
| 22                   | 99.7       | 9.34                 |
| <b>Biotin-ZW4864</b> | 96.0       | 8.83                 |

# Compound 1

Data File C:\Chem32\1\Data\Zhen\Zhen 2017-03-20 09-01-20\006-P1-A8-ZW-2-25.D  
Sample Name: ZW-2-25

```
=====
Acq. Operator   : SYSTEM                      Seq. Line :    6
Acq. Instrument : HPLC                       Location  : P1-A8
Injection Date  : 3/20/2017 11:18:29 AM      Inj       :    1
                                           Inj Volume: 20.000 µl
Acq. Method    : C:\Chem32\1\Data\Zhen\Zhen 2017-03-20 09-01-20\Zhen.M
Last changed   : 3/20/2017 9:01:20 AM by SYSTEM
Analysis Method: C:\Chem32\1\Data\Zhen\Zhen 2017-03-20 09-01-20\Zhen.M (Sequence Method)
Last changed   : 3/21/2017 1:50:46 PM by SYSTEM
=====
```

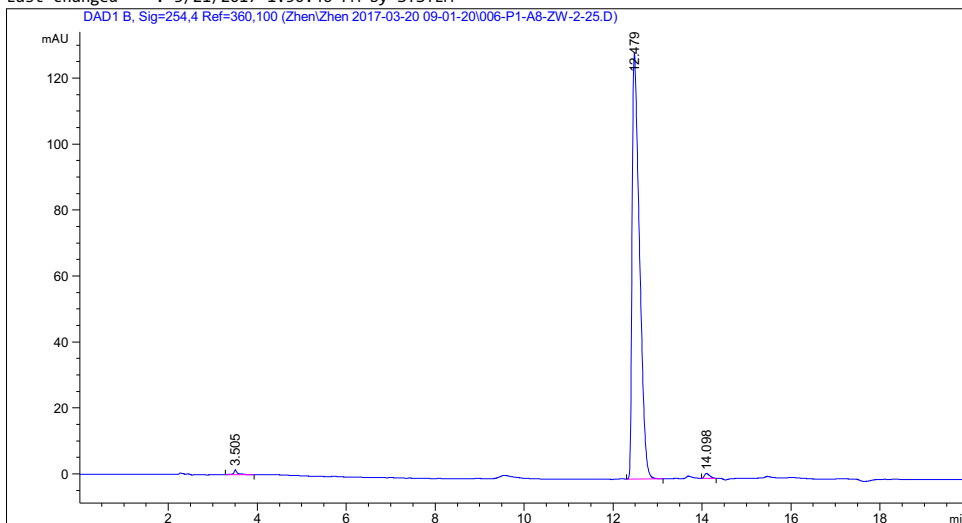

=====  
Area Percent Report  
=====

```
Sorted By      : Signal
Multiplier     : 1.0000
Dilution      : 1.0000
Use Multiplier & Dilution Factor with ISTDs
```

Signal 1: DAD1 B, Sig=254,4 Ref=360,100

| Peak # | RetTime [min] | Type | Width [min] | Area [mAU*s] | Height [mAU] | Area %  |
|--------|---------------|------|-------------|--------------|--------------|---------|
| 1      | 3.505         | BB   | 0.0857      | 8.88748      | 1.40619      | 0.5891  |
| 2      | 12.479        | BB   | 0.1684      | 1487.85767   | 129.16006    | 98.6152 |
| 3      | 14.098        | BB   | 0.1165      | 12.00521     | 1.51430      | 0.7957  |

Totals :                    1508.75035   132.08056

=====  
\*\*\* End of Report \*\*\*

## Compound 2

Data File C:\Chem32\1\Data\Zhen\Zhen 2017-03-20 09-01-20\003-P1-A5-ZW-2-19.D  
Sample Name: ZW-2-19

```
=====
Acq. Operator   : SYSTEM                      Seq. Line :    3
Acq. Instrument : HPLC                       Location  : P1-A5
Injection Date  : 3/20/2017 9:58:52 AM       Inj       :    1
                                           Inj Volume: 20.000 µl
Acq. Method    : C:\Chem32\1\Data\Zhen\Zhen 2017-03-20 09-01-20\Zhen.M
Last changed   : 3/20/2017 9:01:20 AM by SYSTEM
Analysis Method: C:\Chem32\1\Data\Zhen\Zhen 2017-03-20 09-01-20\Zhen.M (Sequence Method)
Last changed   : 3/21/2017 1:50:46 PM by SYSTEM
=====
```

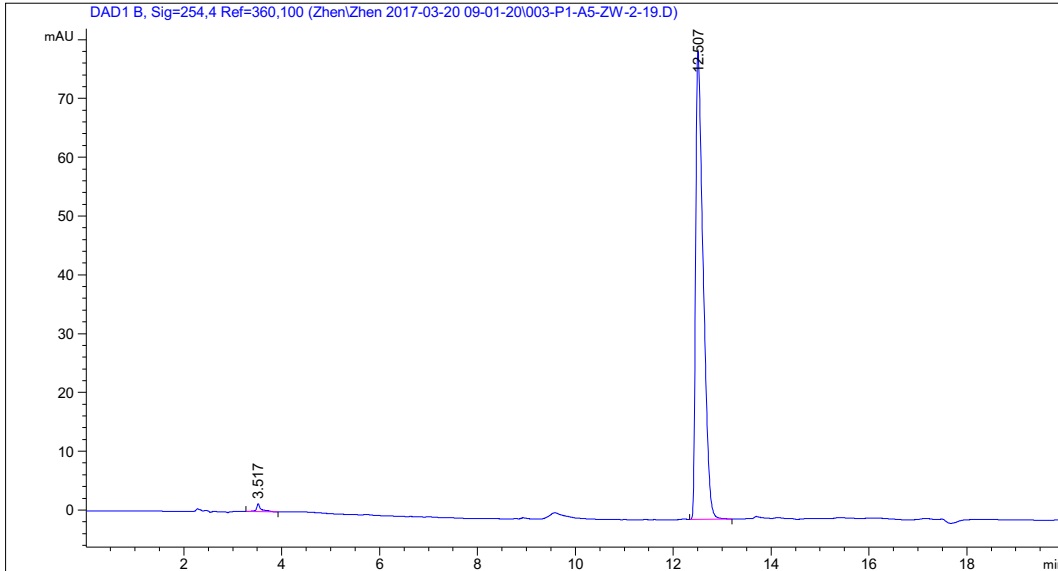

```
=====
Area Percent Report
=====
```

```
Sorted By      : Signal
Multiplier     : 1.0000
Dilution       : 1.0000
Use Multiplier & Dilution Factor with ISTDs
```

Signal 1: DAD1 B, Sig=254,4 Ref=360,100

| Peak # | RetTime [min] | Type | Width [min] | Area [mAU*s] | Height [mAU] | Area %  |
|--------|---------------|------|-------------|--------------|--------------|---------|
| 1      | 3.517         | BB   | 0.0926      | 9.19552      | 1.36523      | 1.0629  |
| 2      | 12.507        | BB   | 0.1577      | 855.95752    | 79.46735     | 98.9371 |

```
Totals :                      865.15304  80.83259
```

```
=====
*** End of Report ***
```

# Compound 3

Data File C:\Chem32\1\Data\Zhen\Zhen 2018-04-16 14-57-43\004-P1-F4-ZW-4-36-4.D

Sample Name: ZW-4-36-4

```
=====
Acq. Operator   : SYSTEM                      Seq. Line :    4
Acq. Instrument : HPLC                       Location  : P1-F4
Injection Date  : 4/16/2018 4:21:05 PM      Inj       :    1
                                                Inj Volume: 80.000 µl
Different Inj Volume from Sample Entry! Actual Inj Volume : 20.000 µl
Method         : C:\Chem32\1\Data\Zhen\Zhen 2018-04-16 14-57-43\Zhen.M (Sequence Method)
Last changed   : 4/16/2018 2:57:43 PM by SYSTEM
=====
```

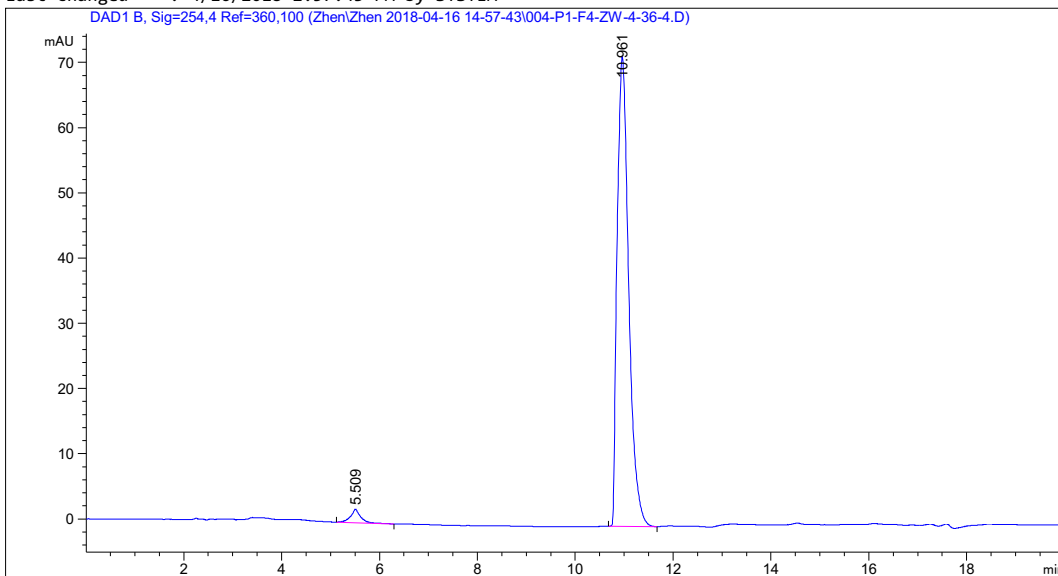

## Area Percent Report

```
Sorted By      : Signal
Multiplier     : 1.0000
Dilution       : 1.0000
Use Multiplier & Dilution Factor with ISTDs
```

Signal 1: DAD1 B, Sig=254,4 Ref=360,100

| Peak # | RetTime [min] | Type | Width [min] | Area [mAU*s] | Height [mAU] | Area %  |
|--------|---------------|------|-------------|--------------|--------------|---------|
| 1      | 5.509         | BB   | 0.1881      | 29.01421     | 2.06317      | 2.4094  |
| 2      | 10.961        | BB   | 0.2645      | 1175.18030   | 71.97823     | 97.5906 |

Totals : 1204.19450 74.04140

\*\*\* End of Report \*\*\*



# Compound 7

Data File C:\Chem32\1\Data\Zhen\Zhen 2018-03-13 09-13-58\004-P1-F4-ZW-4-16-4.D  
Sample Name: ZW-4-16-4

```
=====
Acq. Operator   : SYSTEM                      Seq. Line :    4
Acq. Instrument : HPLC                       Location  : P1-F4
Injection Date  : 3/13/2018 10:37:26 AM      Inj       :    1
                                                Inj Volume: 80.000 µl
Different Inj Volume from Sample Entry! Actual Inj Volume : 20.000 µl
Method          : C:\Chem32\1\Data\Zhen\Zhen 2018-03-13 09-13-58\Zhen.M (Sequence Method)
Last changed    : 3/13/2018 9:13:59 AM by SYSTEM
=====
```

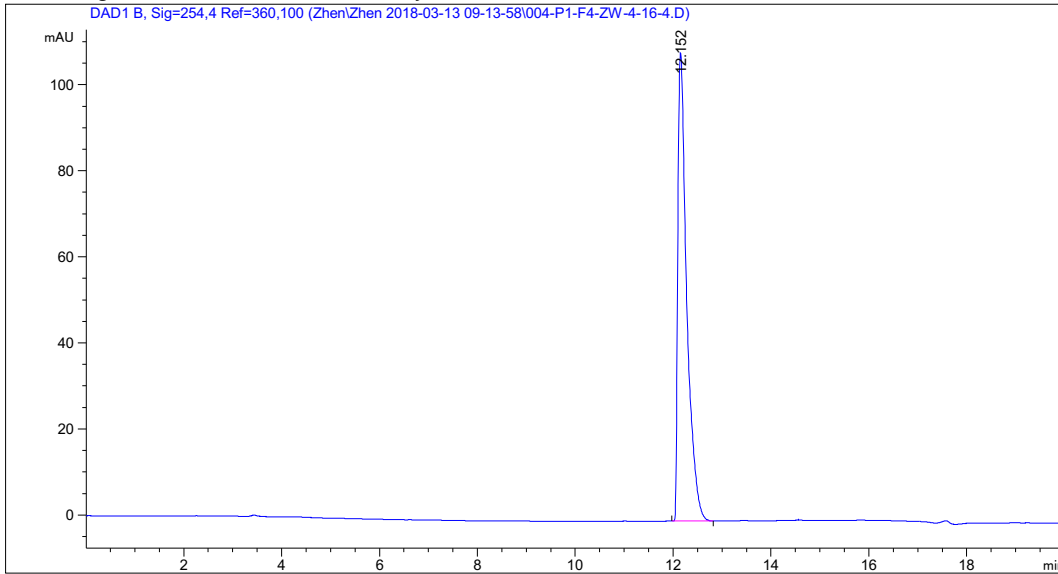

=====  
Area Percent Report  
=====

Sorted By : Signal  
Multiplier : 1.0000  
Dilution : 1.0000  
Use Multiplier & Dilution Factor with ISTDs

Signal 1: DAD1 B, Sig=254,4 Ref=360,100

| Peak # | RetTime [min] | Type | Width [min] | Area [mAU*s] | Height [mAU] | Area %   |
|--------|---------------|------|-------------|--------------|--------------|----------|
| 1      | 12.152        | BB   | 0.1900      | 1379.77026   | 108.80093    | 100.0000 |

Totals : 1379.77026 108.80093

=====  
\*\*\* End of Report \*\*\*

# Compound 15

Data File C:\Chem32\1\Data\Zhen\Zhen 2019-06-18 13-17-06\001-P1-F1-ZW-4-86-4.D

Sample Name: ZW-4-86-4

```
=====
Acq. Operator   : SYSTEM                      Seq. Line :    1
Acq. Instrument : HPLC                       Location  : P1-F1
Injection Date  : 6/18/2019 1:23:31 PM       Inj       :    1
                                                Inj Volume: 20.000 µl
Different Inj Volume from Sample Entry! Actual Inj Volume : 3.000 µl
Method         : C:\Chem32\1\Data\Zhen\Zhen 2019-06-18 13-17-06\Zhen.M (Sequence Method)
Last changed   : 6/18/2019 1:17:07 PM by SYSTEM
=====
```

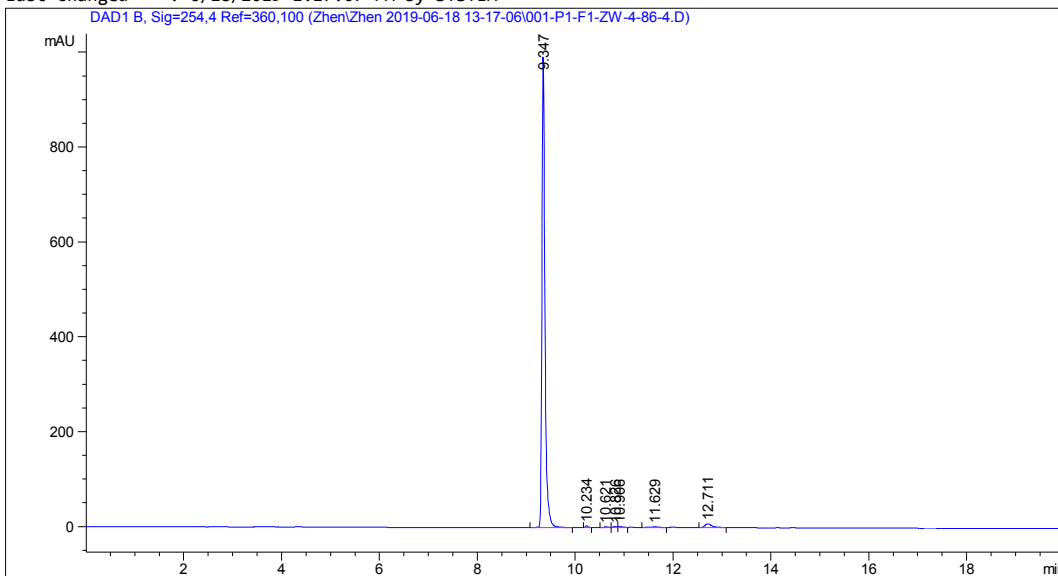

## Area Percent Report

```
Sorted By      : Signal
Multiplier     : 1.0000
Dilution       : 1.0000
Use Multiplier & Dilution Factor with ISTDs
```

Signal 1: DAD1 B, Sig=254,4 Ref=360,100

| Peak # | RetTime [min] | Type | Width [min] | Area [mAU*s] | Height [mAU] | Area %  |
|--------|---------------|------|-------------|--------------|--------------|---------|
| 1      | 9.347         | BB   | 0.0641      | 4278.50879   | 996.16571    | 96.7588 |
| 2      | 10.234        | BB   | 0.0544      | 12.00380     | 3.46852      | 0.2715  |
| 3      | 10.621        | BV   | 0.0808      | 10.25903     | 1.79158      | 0.2320  |
| 4      | 10.826        | VV   | 0.0862      | 11.37997     | 2.00437      | 0.2574  |
| 5      | 10.906        | VB   | 0.0915      | 11.55812     | 1.83584      | 0.2614  |
| 6      | 11.629        | BB   | 0.1676      | 20.89855     | 1.65176      | 0.4726  |
| 7      | 12.711        | BB   | 0.1467      | 77.22118     | 7.85193      | 1.7464  |

Totals : 4421.82944 1014.76970

# Compound 16

Data File C:\Chem32\1\Data\Zhen\Zhen 2019-06-17 16-06-13\001-P1-F1-ZW-4-161-4.D

Sample Name: ZW-4-161-4

```
=====
Acq. Operator   : SYSTEM                      Seq. Line :    1
Acq. Instrument : HPLC                       Location  : P1-F1
Injection Date  : 6/17/2019 4:12:37 PM       Inj       :    1
                                           Inj Volume: 20.000 µl
Different Inj Volume from Sample Entry! Actual Inj Volume : 10.000 µl
Method          : C:\Chem32\1\Data\Zhen\Zhen 2019-06-17 16-06-13\Zhen.M (Sequence Method)
Last changed    : 6/17/2019 4:06:14 PM by SYSTEM
=====
```

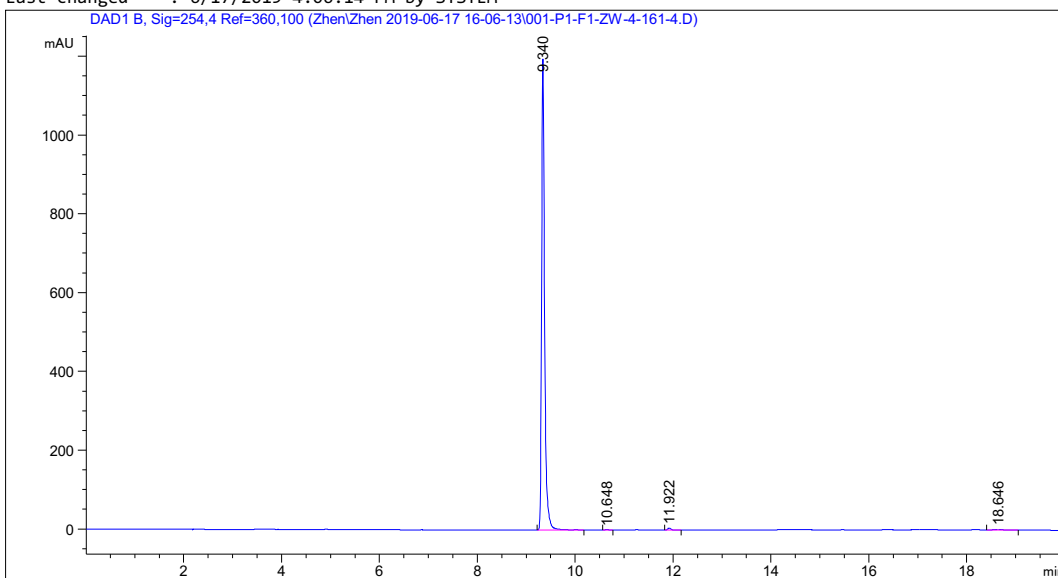

## Area Percent Report

```
Sorted By      : Signal
Multiplier     : 1.0000
Dilution       : 1.0000
Use Multiplier & Dilution Factor with ISTDs
```

Signal 1: DAD1 B, Sig=254,4 Ref=360,100

| Peak # | RetTime [min] | Type | Width [min] | Area [mAU*s] | Height [mAU] | Area %  |
|--------|---------------|------|-------------|--------------|--------------|---------|
| 1      | 9.340         | BV R | 0.0638      | 5124.51270   | 1200.06848   | 98.8473 |
| 2      | 10.648        | BB   | 0.0667      | 7.66544      | 1.76335      | 0.1479  |
| 3      | 11.922        | BB   | 0.0694      | 24.49493     | 5.35611      | 0.4725  |
| 4      | 18.646        | BB   | 0.1797      | 27.60105     | 2.27311      | 0.5324  |

Totals : 5184.27412 1209.46105

\*\*\* End of Report \*\*\*

# Compound 17

Data File C:\Chem32\1\Data\Zhen\Zhen 2018-08-07 09-17-30\005-P1-F5-ZW-4-87-4.D

Sample Name: ZW-4-87-4

```
=====
Acq. Operator   : SYSTEM                      Seq. Line :    5
Acq. Instrument : HPLC                       Location  : P1-F5
Injection Date  : 8/7/2018 11:07:25 AM      Inj       :    1
                                                Inj Volume: 80.000 µl
Different Inj Volume from Sample Entry! Actual Inj Volume : 20.000 µl
Method         : C:\Chem32\1\Data\Zhen\Zhen 2018-08-07 09-17-30\Zhen.M (Sequence Method)
Last changed   : 8/7/2018 9:17:30 AM by SYSTEM
=====
```

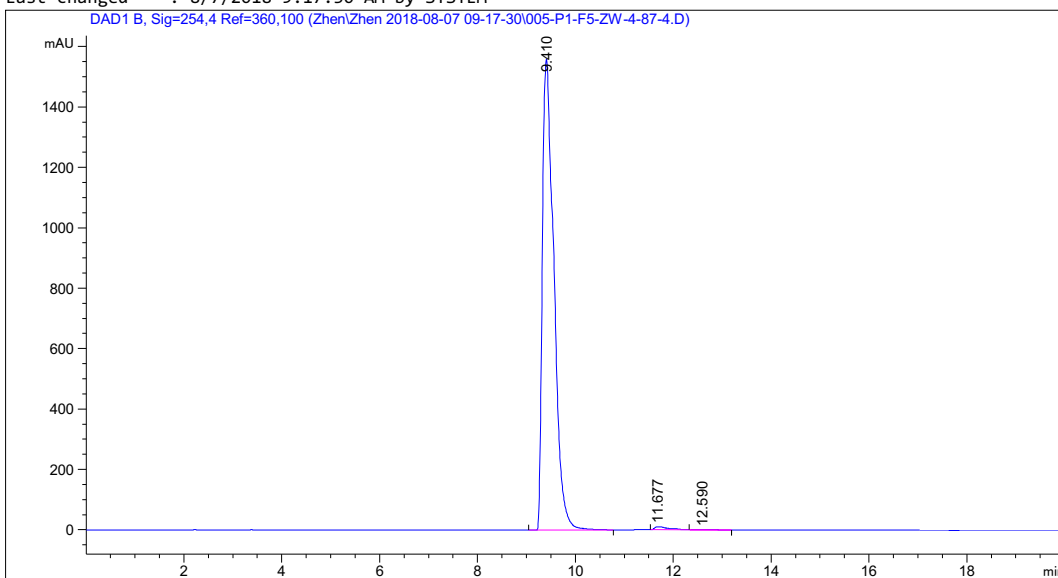

## Area Percent Report

```
Sorted By      : Signal
Multiplier     : 1.0000
Dilution       : 1.0000
Use Multiplier & Dilution Factor with ISTDs
```

Signal 1: DAD1 B, Sig=254,4 Ref=360,100

| Peak # | RetTime [min] | Type | Width [min] | Area [mAU*s] | Height [mAU] | Area %  |
|--------|---------------|------|-------------|--------------|--------------|---------|
| 1      | 9.410         | BB   | 0.2323      | 2.54579e4    | 1560.33081   | 99.1045 |
| 2      | 11.677        | BV R | 0.2573      | 197.27127    | 9.86483      | 0.7680  |
| 3      | 12.590        | VB E | 0.2857      | 32.75716     | 1.62133      | 0.1275  |

Totals : 2.56879e4 1571.81698

\*\*\* End of Report \*\*\*

# Compound 18

Data File C:\Chem32\1\Data\Zhen\Zhen 2018-07-18 13-24-08\005-P1-F3-ZW-4-68-4.D

Sample Name: ZW-4-68-4

```
=====
Acq. Operator   : SYSTEM                      Seq. Line :    5
Acq. Instrument : HPLC                       Location  : P1-F3
Injection Date  : 7/18/2018 3:20:13 PM       Inj       :    1
                                                Inj Volume: 80.000 µl
Different Inj Volume from Sample Entry! Actual Inj Volume : 20.000 µl
Method          : C:\Chem32\1\Data\Zhen\Zhen 2018-07-18 13-24-08\Zhen.M (Sequence Method)
Last changed    : 7/18/2018 1:24:08 PM by SYSTEM
=====
```

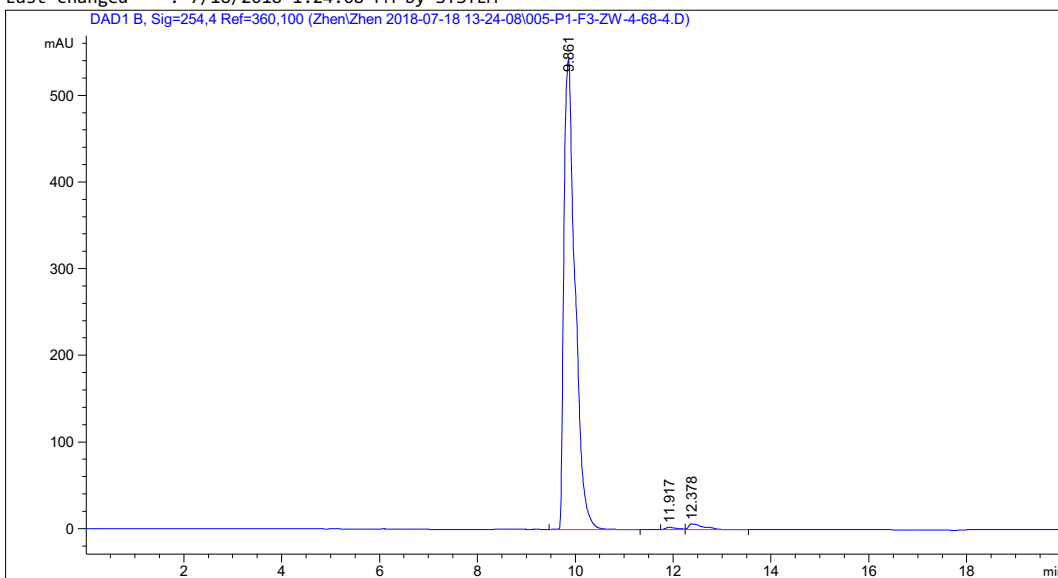

## Area Percent Report

```
Sorted By      : Signal
Multiplier     : 1.0000
Dilution       : 1.0000
Use Multiplier & Dilution Factor with ISTDs
```

Signal 1: DAD1 B, Sig=254,4 Ref=360,100

| Peak # | RetTime [min] | Type | Width [min] | Area [mAU*s] | Height [mAU] | Area %  |
|--------|---------------|------|-------------|--------------|--------------|---------|
| 1      | 9.861         | BB   | 0.2346      | 8590.25000   | 543.04675    | 97.9676 |
| 2      | 11.917        | BV   | 0.2363      | 38.83273     | 2.43210      | 0.4429  |
| 3      | 12.378        | VB   | 0.2807      | 139.37563    | 6.48695      | 1.5895  |

Totals : 8768.45835 551.96581

\*\*\* End of Report \*\*\*

# Compound 19

Data File C:\Chem32\1\Data\Zhen\Zhen 2019-01-28 11-28-15\001-P1-F1-ZW-4-192-4.D

Sample Name: ZW-4-192-4

```
=====
Acq. Operator   : SYSTEM                      Seq. Line :    1
Acq. Instrument : HPLC                      Location  : P1-F1
Injection Date  : 1/28/2019 11:37:47 AM      Inj       :    1
                                           Inj Volume: 80.000 µl
Different Inj Volume from Sample Entry! Actual Inj Volume : 20.000 µl
Method         : C:\Chem32\1\Data\Zhen\Zhen 2019-01-28 11-28-15\Zhen.M (Sequence Method)
Last changed   : 1/28/2019 11:28:16 AM by SYSTEM
=====
```

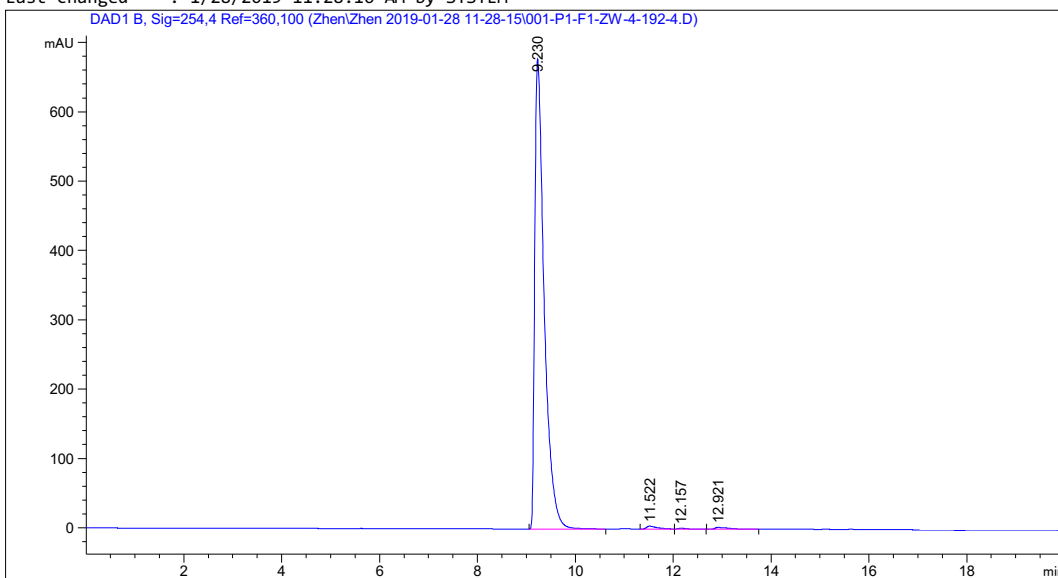

## Area Percent Report

```
Sorted By      : Signal
Multiplier     : 1.0000
Dilution       : 1.0000
Use Multiplier & Dilution Factor with ISTDs
```

Signal 1: DAD1 B, Sig=254,4 Ref=360,100

| Peak # | RetTime [min] | Type | Width [min] | Area [mAU*s] | Height [mAU] | Area %  |
|--------|---------------|------|-------------|--------------|--------------|---------|
| 1      | 9.230         | BB   | 0.2025      | 9097.58008   | 678.28180    | 98.5312 |
| 2      | 11.522        | BV   | 0.2205      | 69.13280     | 4.32439      | 0.7487  |
| 3      | 12.157        | VB   | 0.1917      | 17.16881     | 1.33839      | 0.1859  |
| 4      | 12.921        | BB   | 0.2458      | 49.31326     | 2.64198      | 0.5341  |

Totals : 9233.19495 686.58656

\*\*\* End of Report \*\*\*

# Compound 20

Data File C:\Chem32\1\Data\Zhen\Zhen 2019-01-23 16-14-42\002-P1-F2-ZW-4-177.D  
Sample Name: ZW-4-177

```
=====
Acq. Operator   : SYSTEM                      Seq. Line :    2
Acq. Instrument : HPLC                      Location  : P1-F2
Injection Date  : 1/23/2019 4:47:52 PM      Inj       :    1
                                                Inj Volume: 80.000 µl
Different Inj Volume from Sample Entry! Actual Inj Volume : 20.000 µl
Method          : C:\Chem32\1\Data\Zhen\Zhen 2019-01-23 16-14-42\Zhen.M (Sequence Method)
Last changed    : 1/23/2019 4:14:43 PM by SYSTEM
=====
```

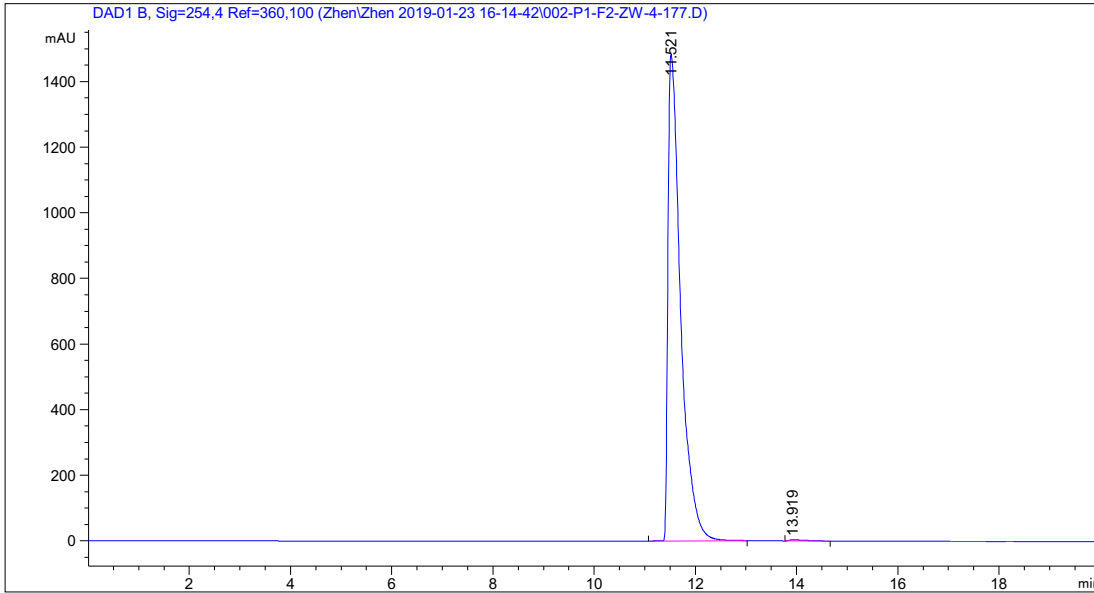

## Area Percent Report

```
Sorted By      : Signal
Multiplier     : 1.0000
Dilution       : 1.0000
Use Multiplier & Dilution Factor with ISTDs
```

Signal 1: DAD1 B, Sig=254,4 Ref=360,100

| Peak # | RetTime [min] | Type | Width [min] | Area [mAU*s] | Height [mAU] | Area %  |
|--------|---------------|------|-------------|--------------|--------------|---------|
| 1      | 11.521        | BB   | 0.2646      | 2.57907e4    | 1484.96643   | 99.6940 |
| 2      | 13.919        | BB   | 0.2485      | 79.15220     | 4.11319      | 0.3060  |

Totals : 2.58699e4 1489.07962

\*\*\* End of Report \*\*\*

# Compound 21

Data File C:\Chem32\1\Data\Zhen\Zhen 2018-10-02 16-51-06\001-P1-F1-ZW-4-119-4--007.D

Sample Name: ZW-4-114-4

```
=====
Acq. Operator   : SYSTEM                      Seq. Line :    7
Acq. Instrument : HPLC                      Location  : P1-F7
Injection Date  : 10/2/2018 7:40:15 PM      Inj       :    1
                                           Inj Volume: 80.000 µl
Different Inj Volume from Sample Entry! Actual Inj Volume : 20.000 µl
Method          : C:\Chem32\1\Data\Zhen\Zhen 2018-10-02 16-51-06\Zhen.M (Sequence Method)
Last changed    : 10/2/2018 4:51:06 PM by SYSTEM
=====
```

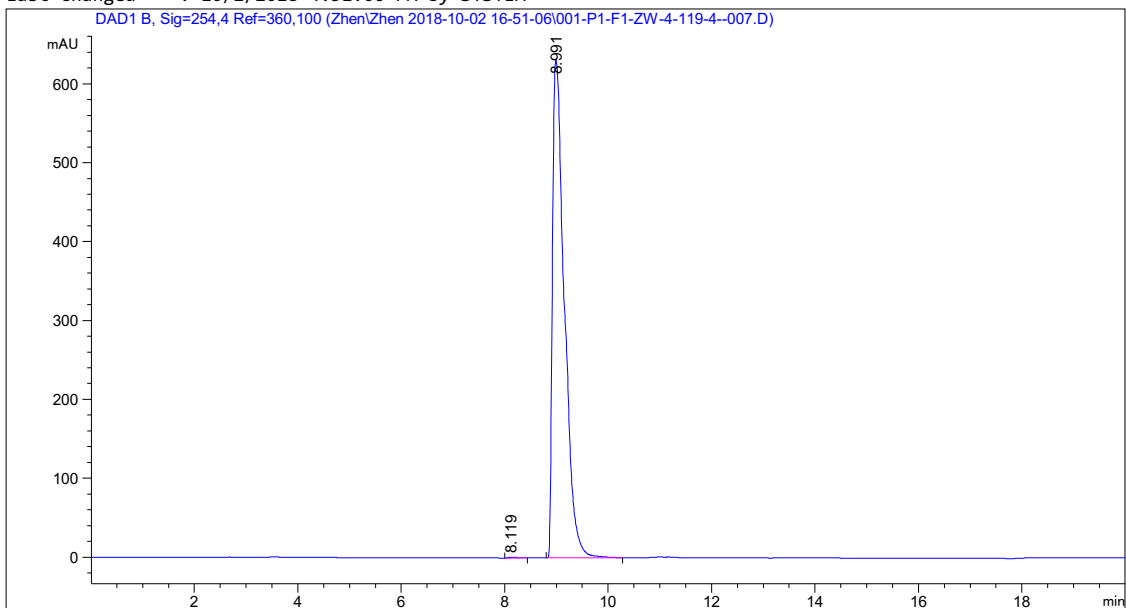

## Area Percent Report

```
=====
Sorted By      : Signal
Multiplier     : 1.0000
Dilution       : 1.0000
Use Multiplier & Dilution Factor with ISTDs
=====
```

Signal 1: DAD1 B, Sig=254,4 Ref=360,100

| Peak # | RetTime [min] | Type | Width [min] | Area [mAU*s] | Height [mAU] | Area %  |
|--------|---------------|------|-------------|--------------|--------------|---------|
| 1      | 8.119         | BB   | 0.1395      | 11.79428     | 1.15122      | 0.1169  |
| 2      | 8.991         | BB   | 0.2364      | 1.00763e4    | 630.53009    | 99.8831 |

Totals : 1.00881e4 631.68131

\*\*\* End of Report \*\*\*



# Compound 22

Data File C:\Chem32\1\Data\Zhen\Zhen 2018-10-02 16-51-06\001-P1-F1-ZW-4-119-4--006.D

Sample Name: ZW-4-112-4

```
=====
Acq. Operator   : SYSTEM                      Seq. Line :    6
Acq. Instrument : HPLC                      Location  : P1-F6
Injection Date  : 10/2/2018 7:13:39 PM      Inj       :    1
                                                Inj Volume: 80.000 µl
Different Inj Volume from Sample Entry! Actual Inj Volume : 20.000 µl
Method         : C:\Chem32\1\Data\Zhen\Zhen 2018-10-02 16-51-06\Zhen.M (Sequence Method)
Last changed   : 10/2/2018 4:51:06 PM by SYSTEM
=====
```

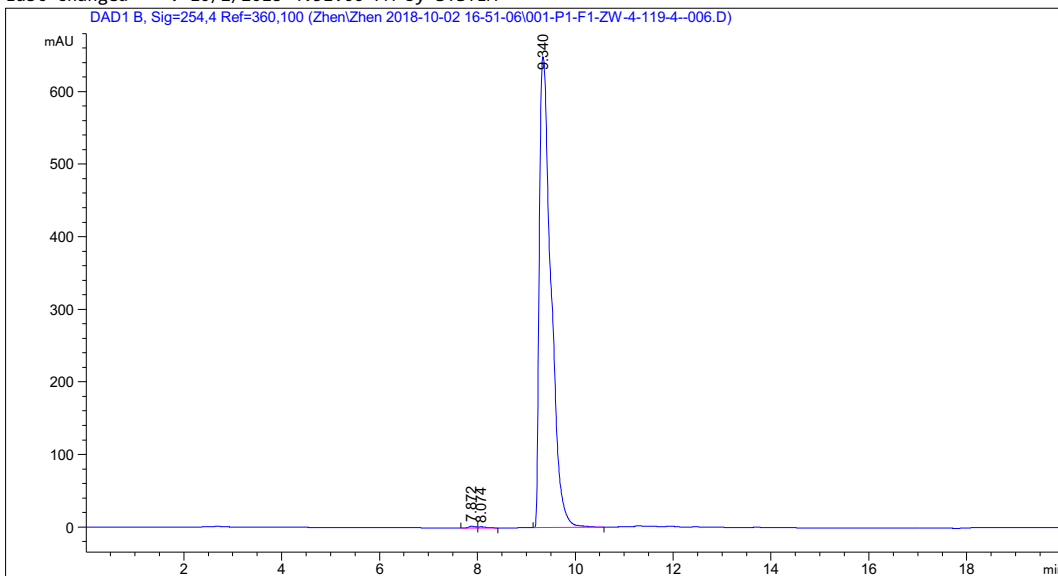

## Area Percent Report

```
Sorted By      : Signal
Multiplier     : 1.0000
Dilution       : 1.0000
Use Multiplier & Dilution Factor with ISTDs
```

Signal 1: DAD1 B, Sig=254,4 Ref=360,100

| Peak # | RetTime [min] | Type | Width [min] | Area [mAU*s] | Height [mAU] | Area %  |
|--------|---------------|------|-------------|--------------|--------------|---------|
| 1      | 7.872         | BV   | 0.1227      | 20.46256     | 2.32472      | 0.1909  |
| 2      | 8.074         | VB   | 0.1309      | 14.41464     | 1.48991      | 0.1345  |
| 3      | 9.340         | BB   | 0.2442      | 1.06845e4    | 648.63574    | 99.6746 |

Totals : 1.07194e4 652.45038

\*\*\* End of Report \*\*\*

# Biotin-ZW4864

Data File C:\Chem32\1\Data\Zhen\Zhen 2019-01-10 13-51-59\001-P1-F3-ZW-4-181-new.D  
 Sample Name: ZW-4-181-new

```

=====
Acq. Operator   : SYSTEM                      Seq. Line :    1
Acq. Instrument : HPLC                      Location  : P1-F3
Injection Date  : 1/10/2019 1:58:38 PM      Inj       :    1
                                           Inj Volume: 80.000 µl
Different Inj Volume from Sample Entry! Actual Inj Volume : 20.000 µl
Method          : C:\Chem32\1\Data\Zhen\Zhen 2019-01-10 13-51-59\Zhen.M (Sequence Method)
Last changed    : 1/10/2019 1:52:00 PM by SYSTEM
  
```

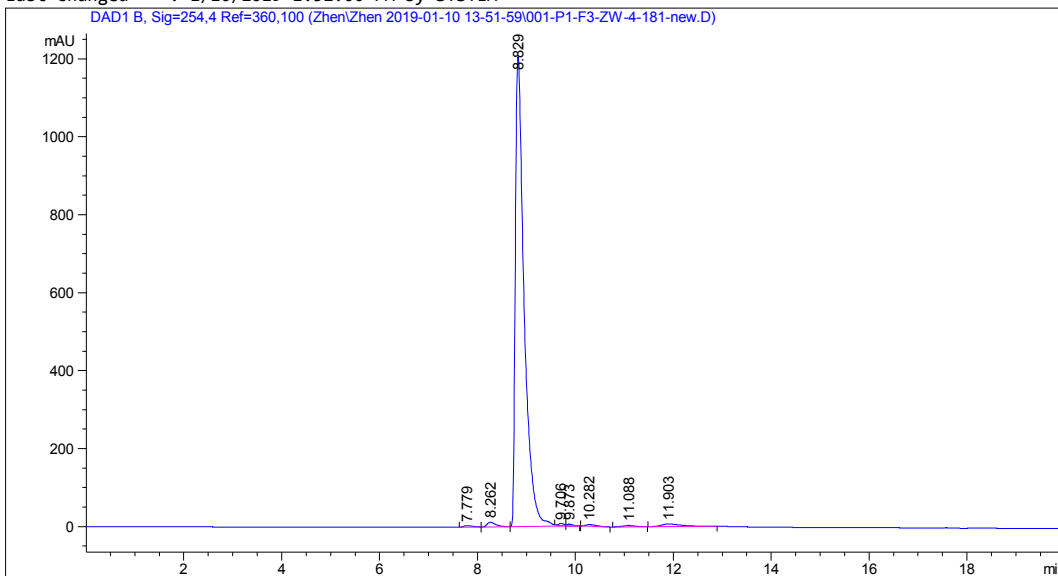

## Area Percent Report

```

Sorted By      : Signal
Multiplier     : 1.0000
Dilution       : 1.0000
Use Multiplier & Dilution Factor with ISTDs
  
```

Signal 1: DAD1 B, Sig=254,4 Ref=360,100

| Peak # | RetTime [min] | Type | Width [min] | Area [mAU*s] | Height [mAU] | Area %  |
|--------|---------------|------|-------------|--------------|--------------|---------|
| 1      | 7.779         | BV   | 0.1983      | 41.73529     | 3.42166      | 0.2643  |
| 2      | 8.262         | VB   | 0.1851      | 150.59569    | 12.10558     | 0.9536  |
| 3      | 8.829         | BV R | 0.1867      | 1.51688e4    | 1205.94653   | 96.0505 |
| 4      | 9.706         | VV E | 0.1159      | 44.89343     | 5.82460      | 0.2843  |
| 5      | 9.873         | VB E | 0.1318      | 42.79675     | 4.81042      | 0.2710  |
| 6      | 10.282        | BB   | 0.1951      | 64.29467     | 4.54352      | 0.4071  |
| 7      | 11.088        | BB   | 0.2791      | 65.54153     | 3.52163      | 0.4150  |
| 8      | 11.903        | BB   | 0.4381      | 213.86261    | 6.96707      | 1.3542  |

Totals : 1.57925e4 1247.14102

# NMR Spectra

## <sup>1</sup>H NMR for compound 1

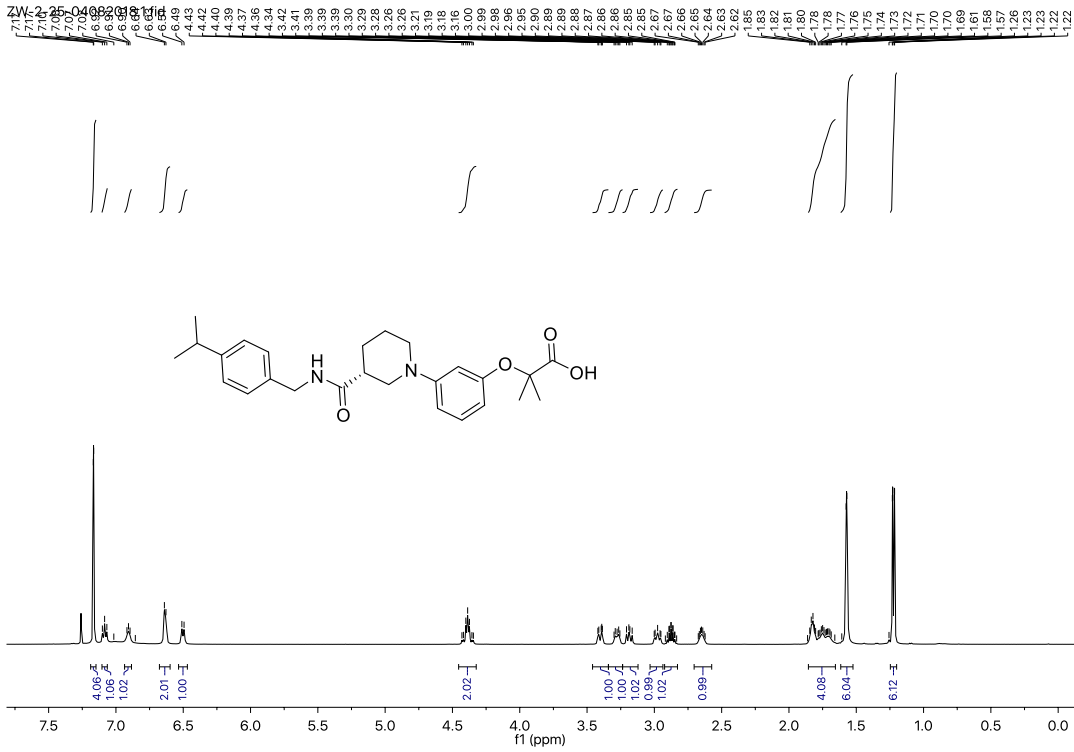

## <sup>13</sup>C NMR for compound 1

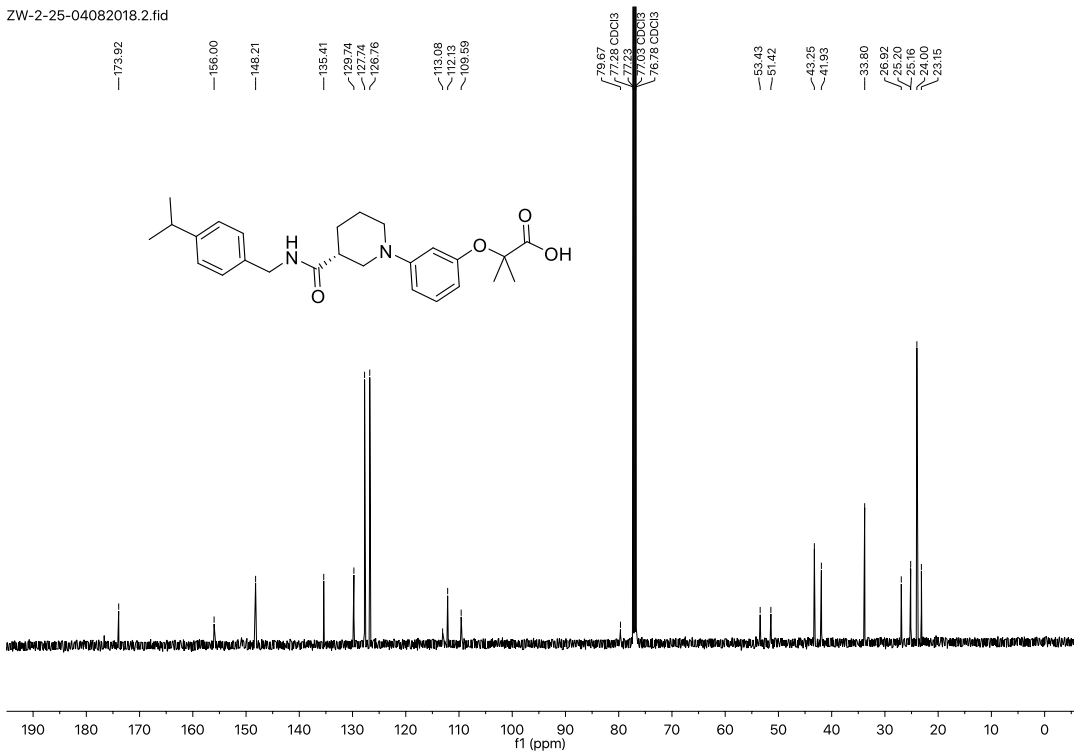



### <sup>1</sup>H NMR for compound 3

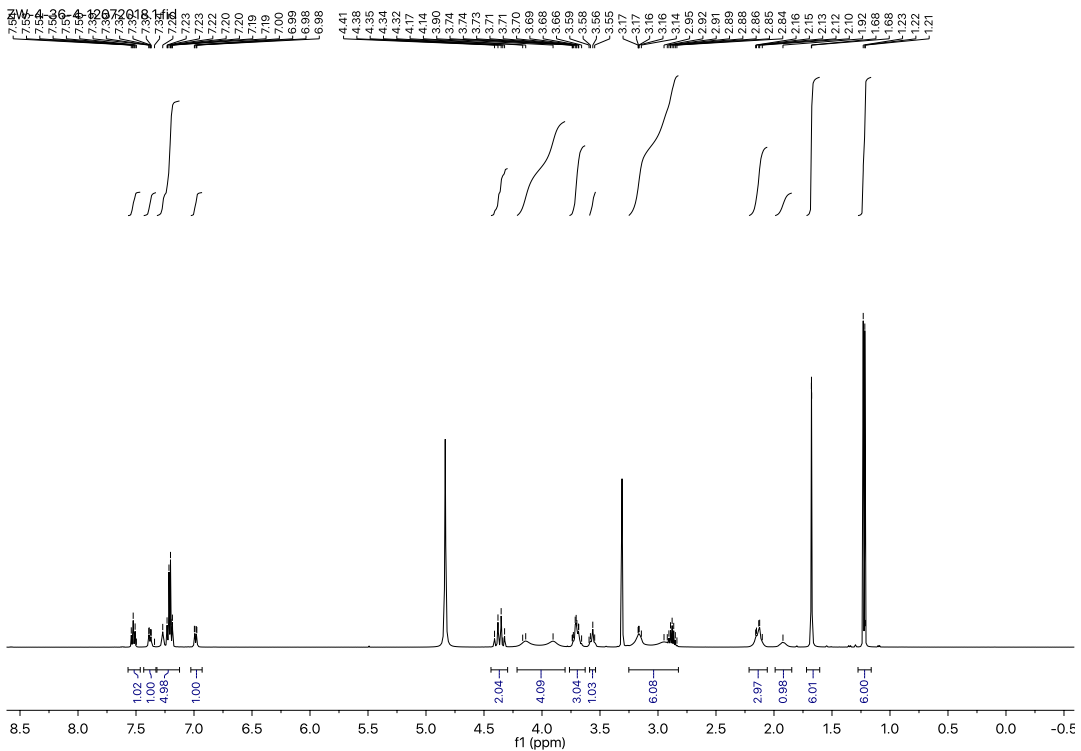

### <sup>13</sup>C NMR for compound 3

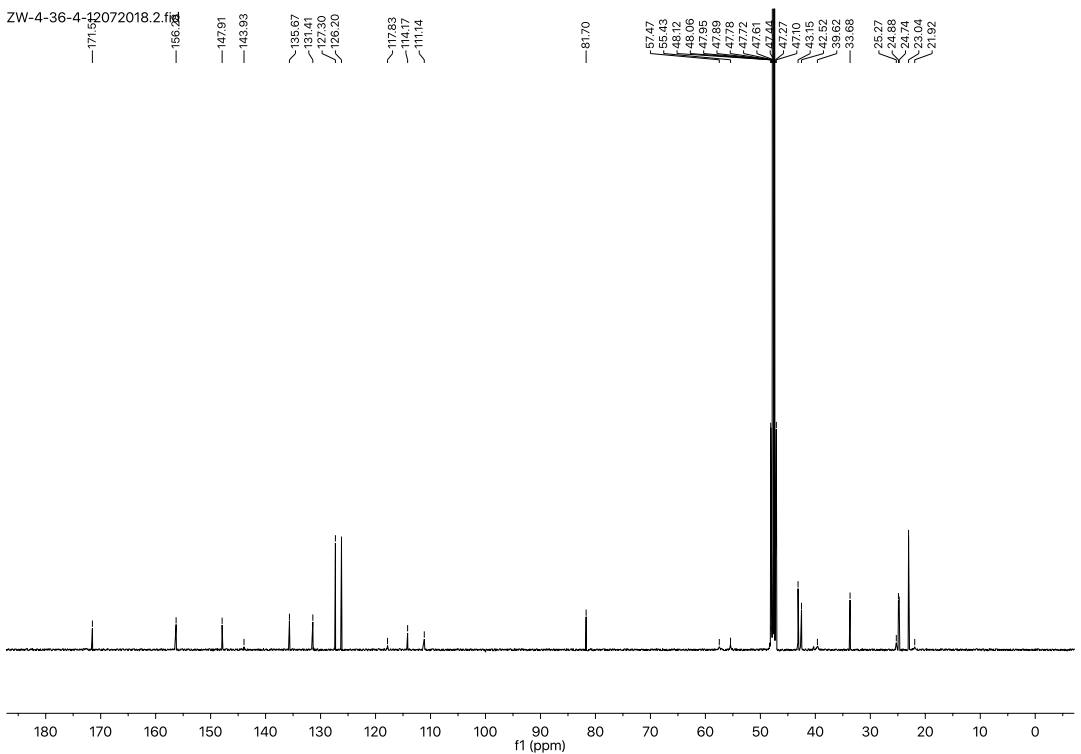

# <sup>1</sup>H NMR for compound 4

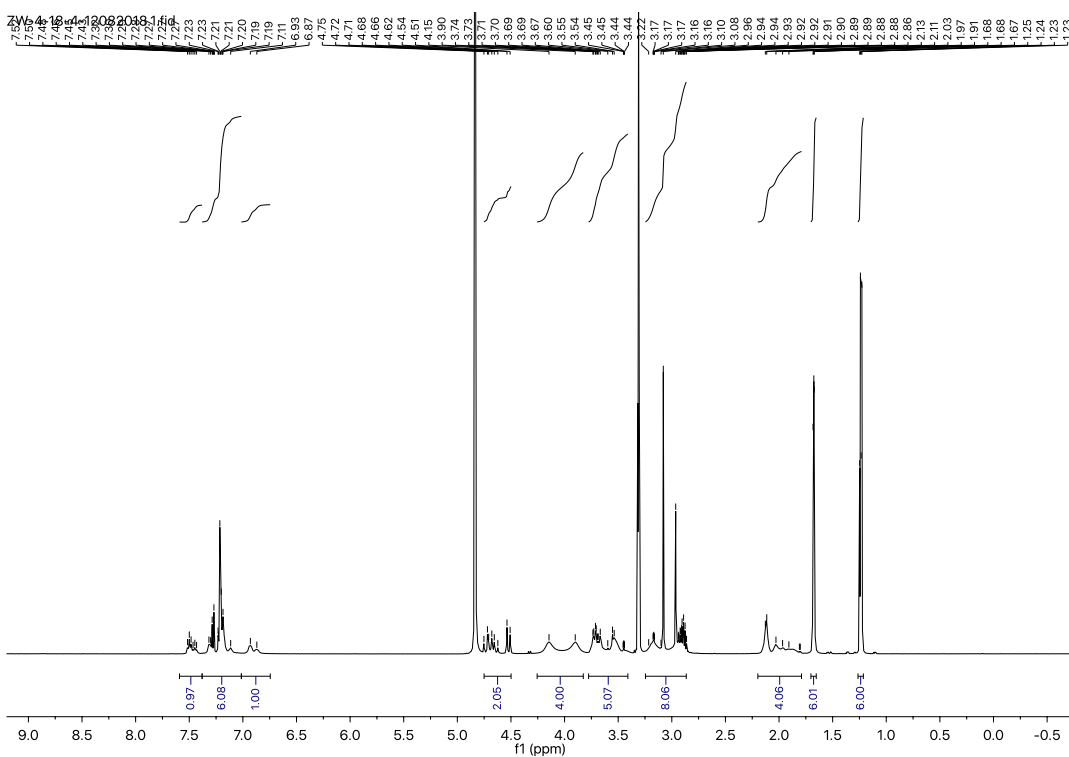

# <sup>13</sup>C NMR for compound 4

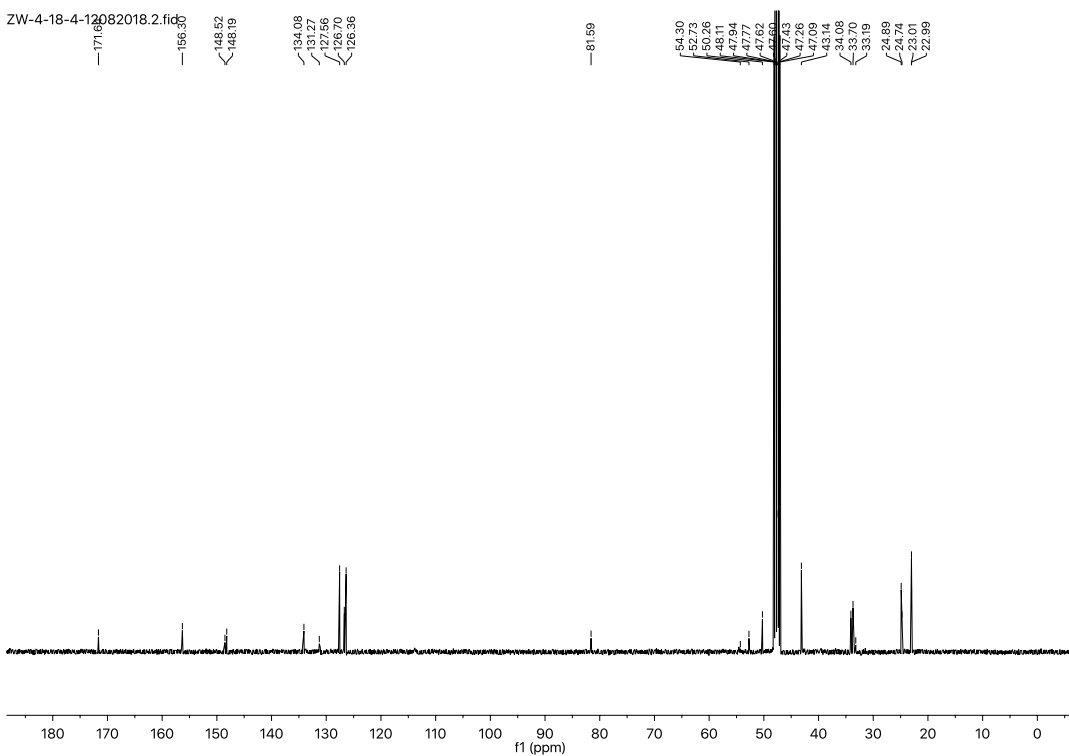

# <sup>1</sup>H NMR for compound 5

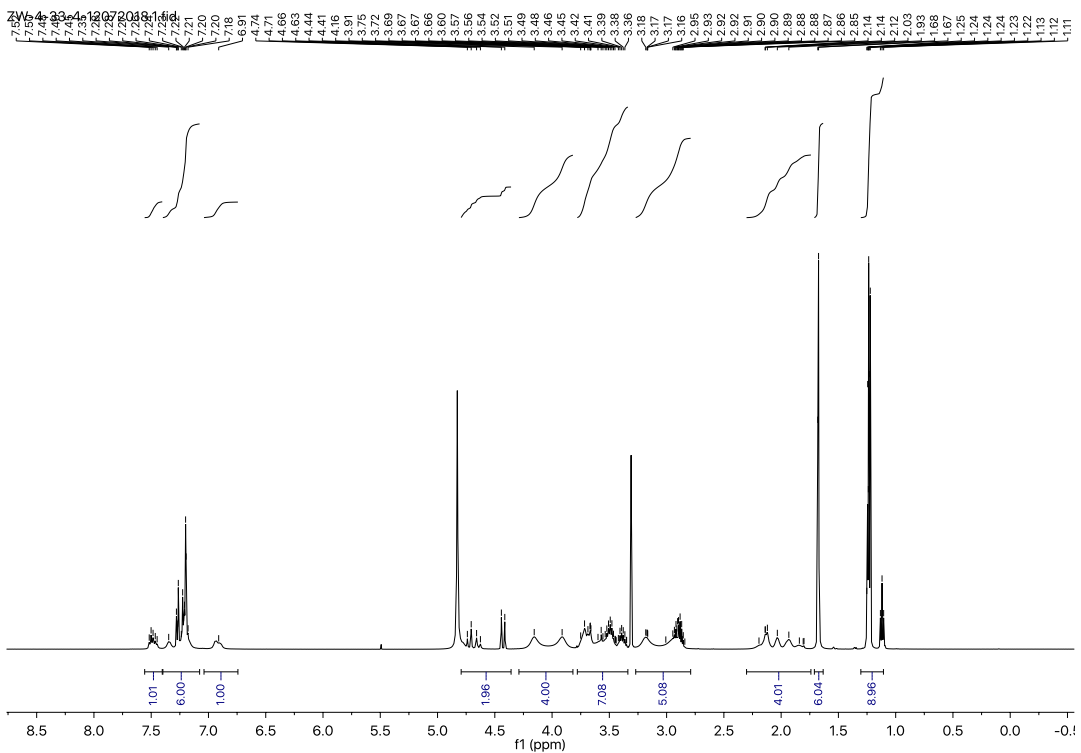

# <sup>13</sup>C NMR for compound 5

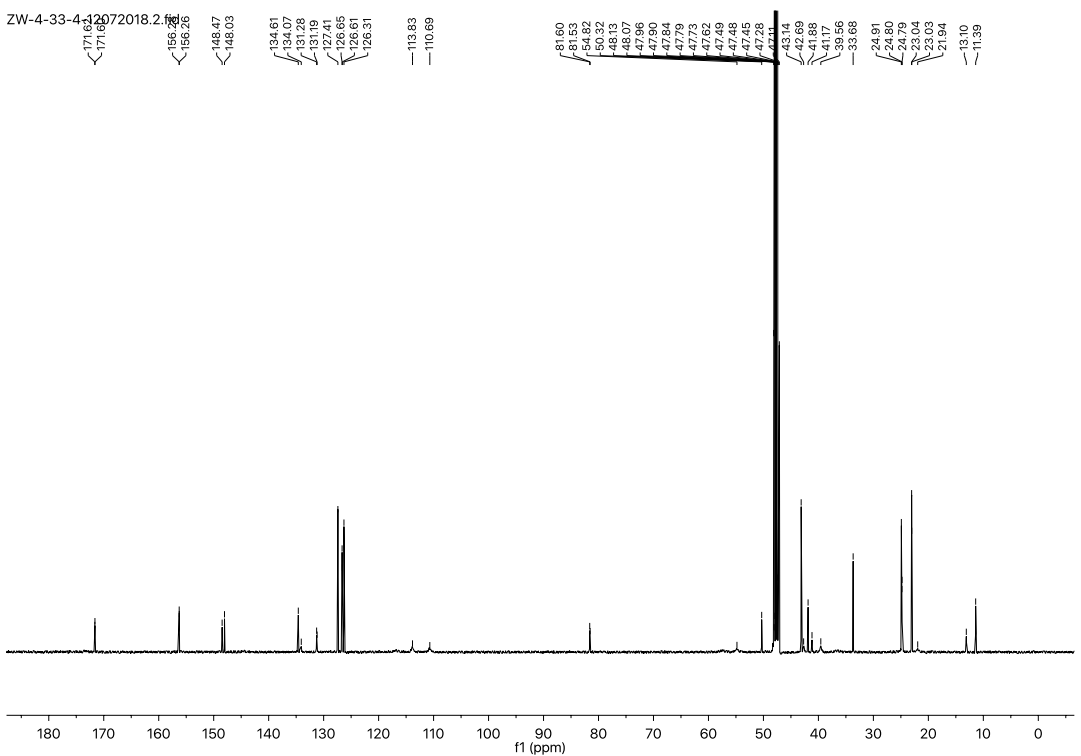

# <sup>1</sup>H NMR for compound 6

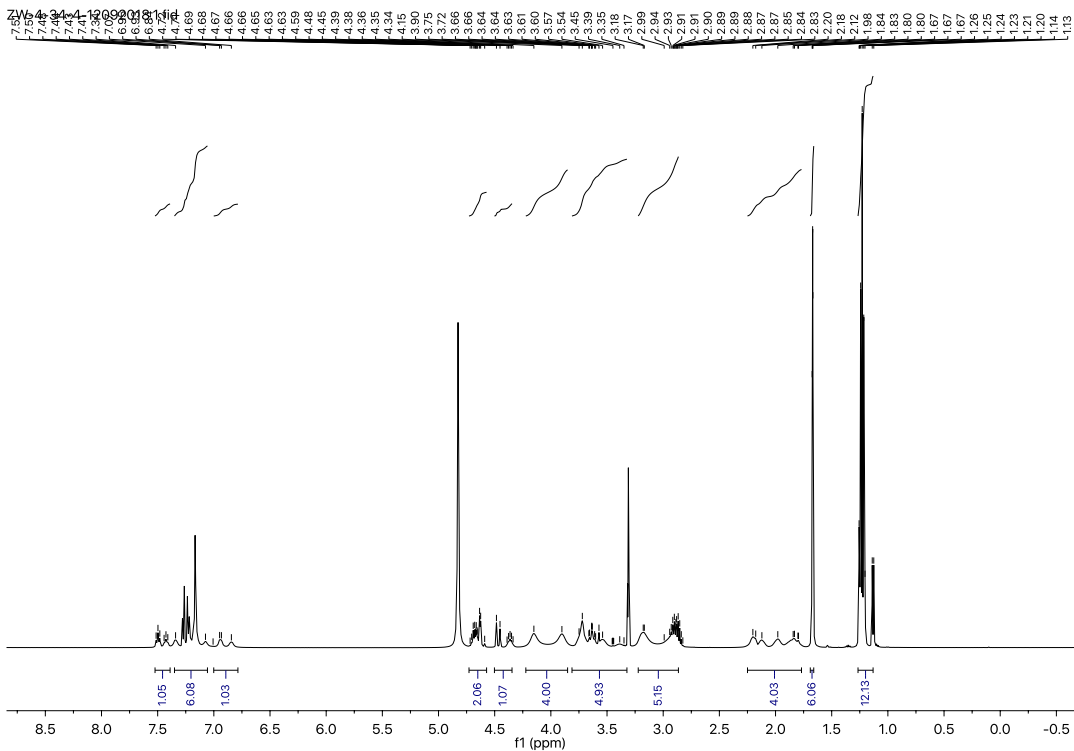

# <sup>13</sup>C NMR for compound 6

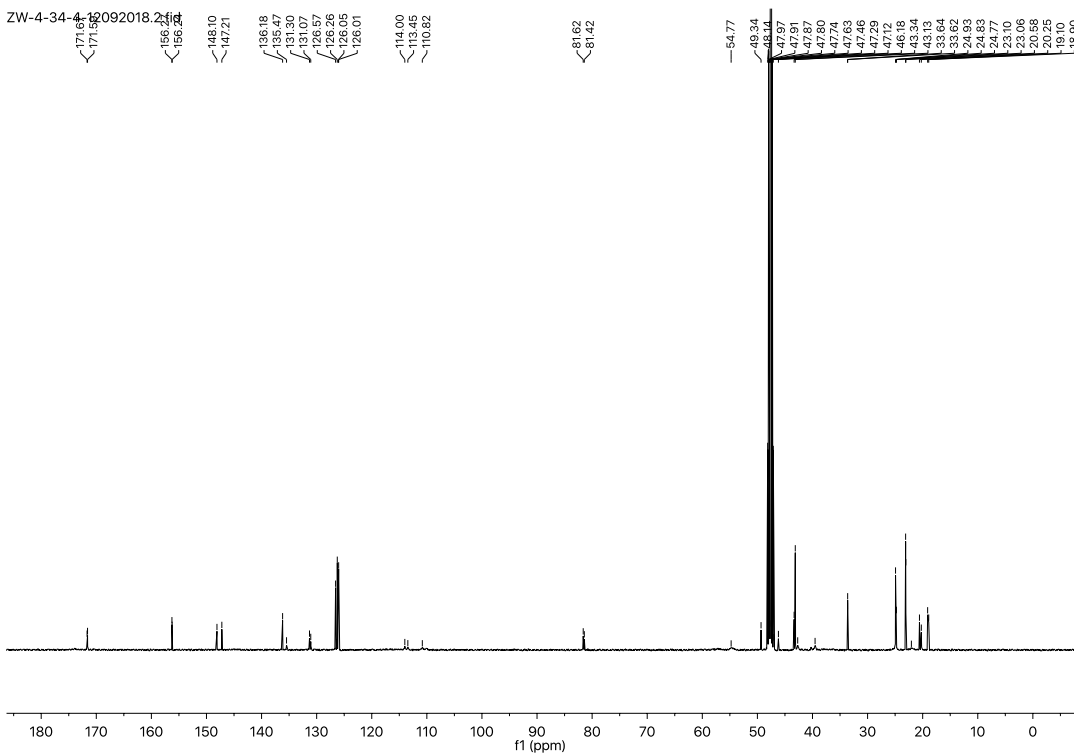



# <sup>1</sup>H NMR for compound 7

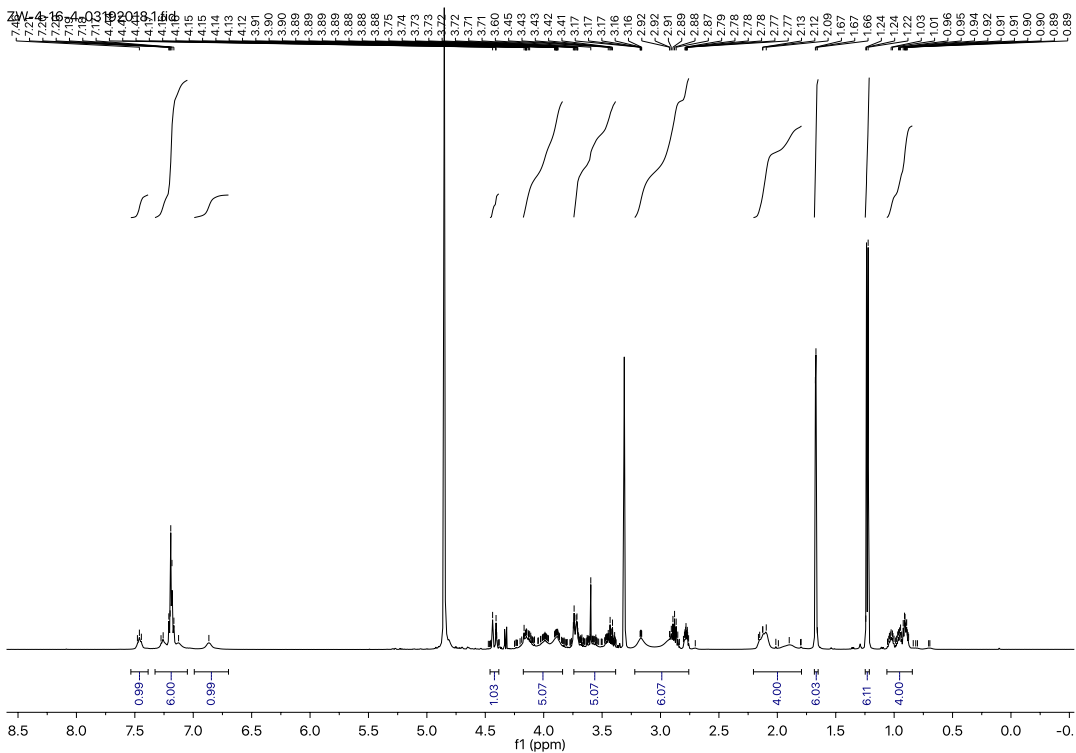

# <sup>1</sup>H NMR for compound **8**

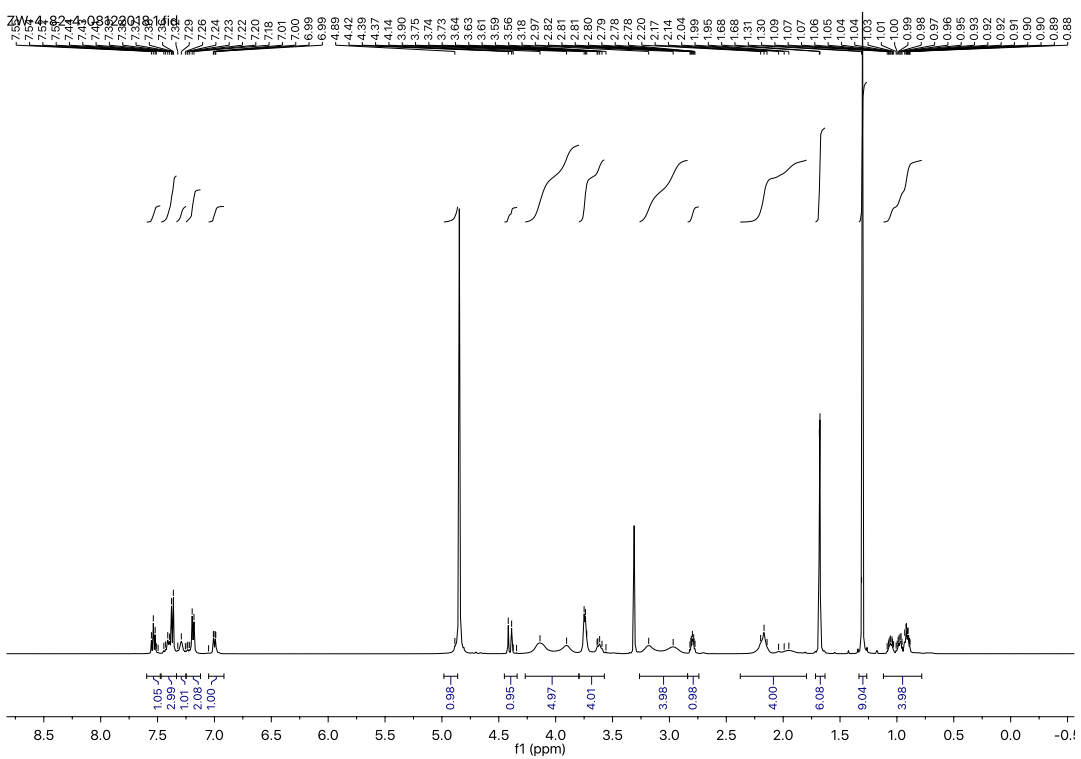







# <sup>1</sup>H NMR for compound 12

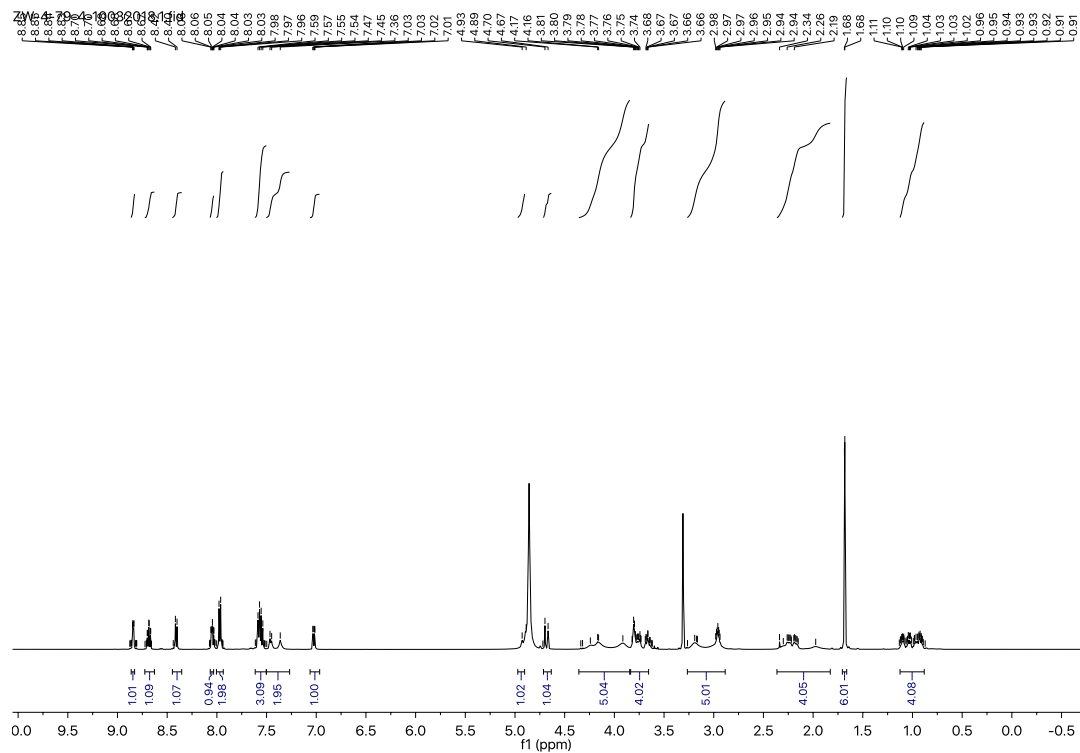

# <sup>1</sup>H NMR for compound 13

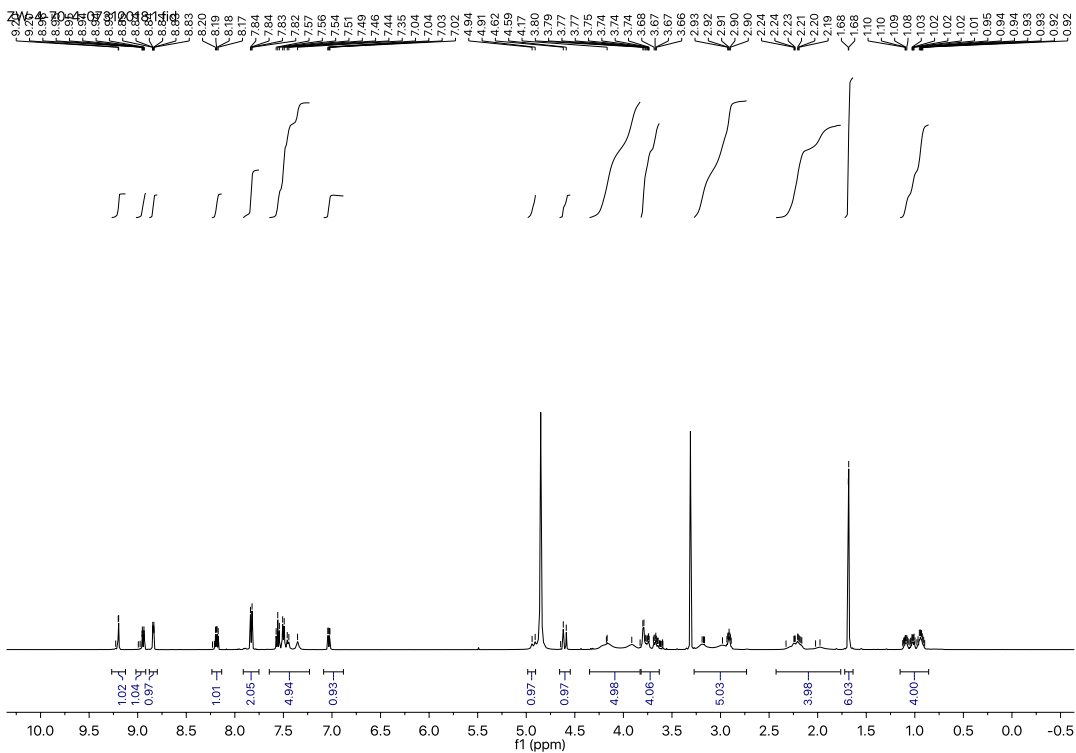

# <sup>13</sup>C NMR for compound 13

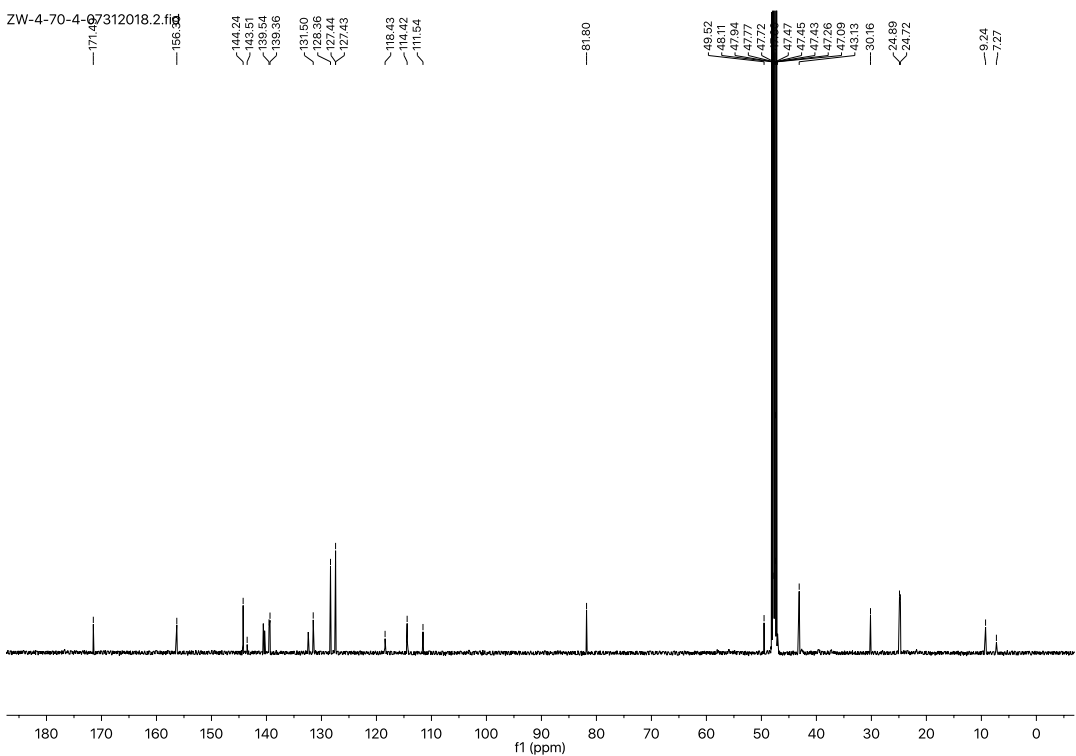

# <sup>1</sup>H NMR for compound 14

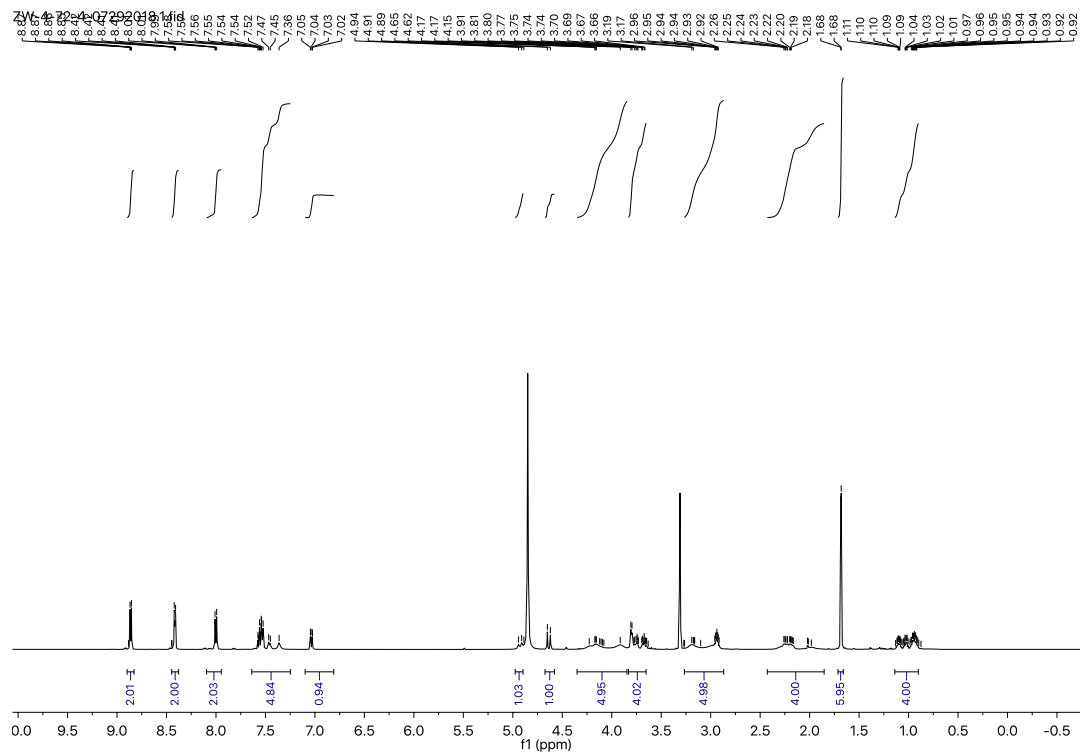



# <sup>1</sup>H NMR for compound 15

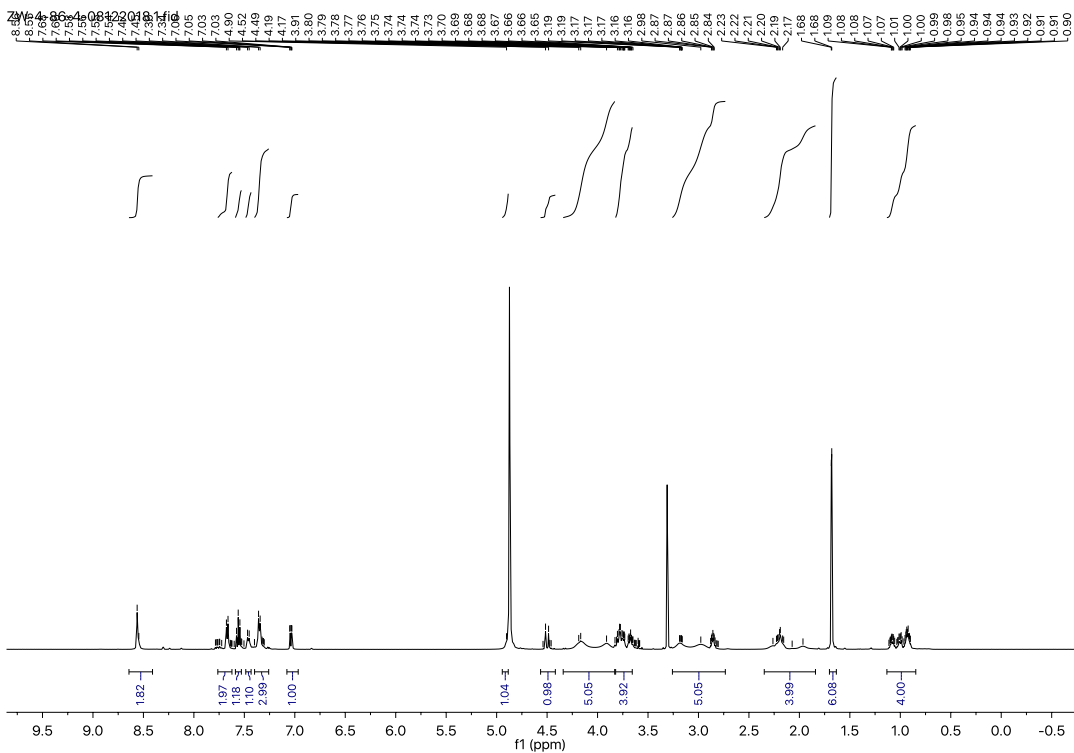

# <sup>13</sup>C NMR for compound 15

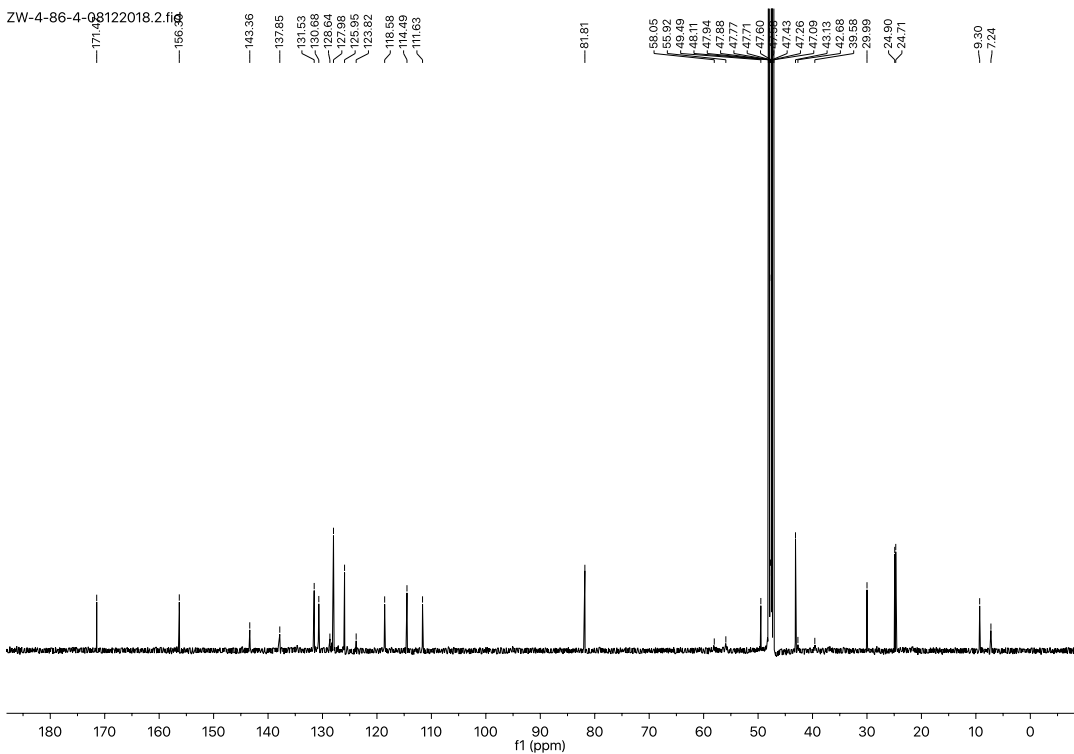

# <sup>1</sup>H NMR for compound 16

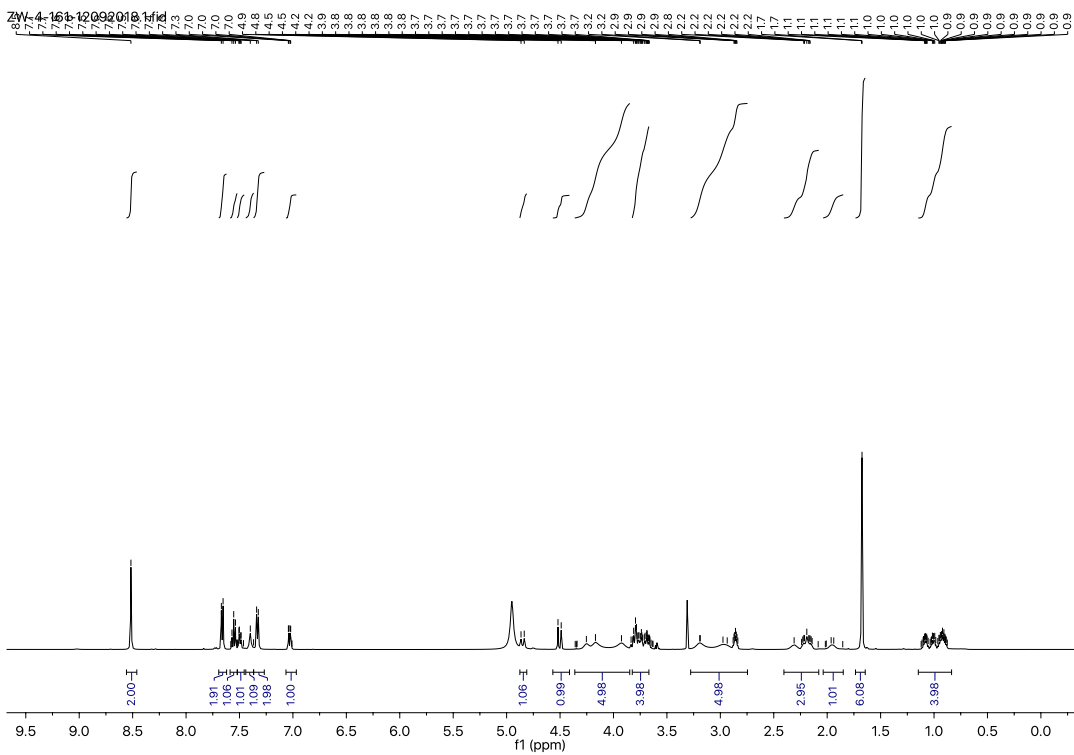

# <sup>13</sup>C NMR for compound 16

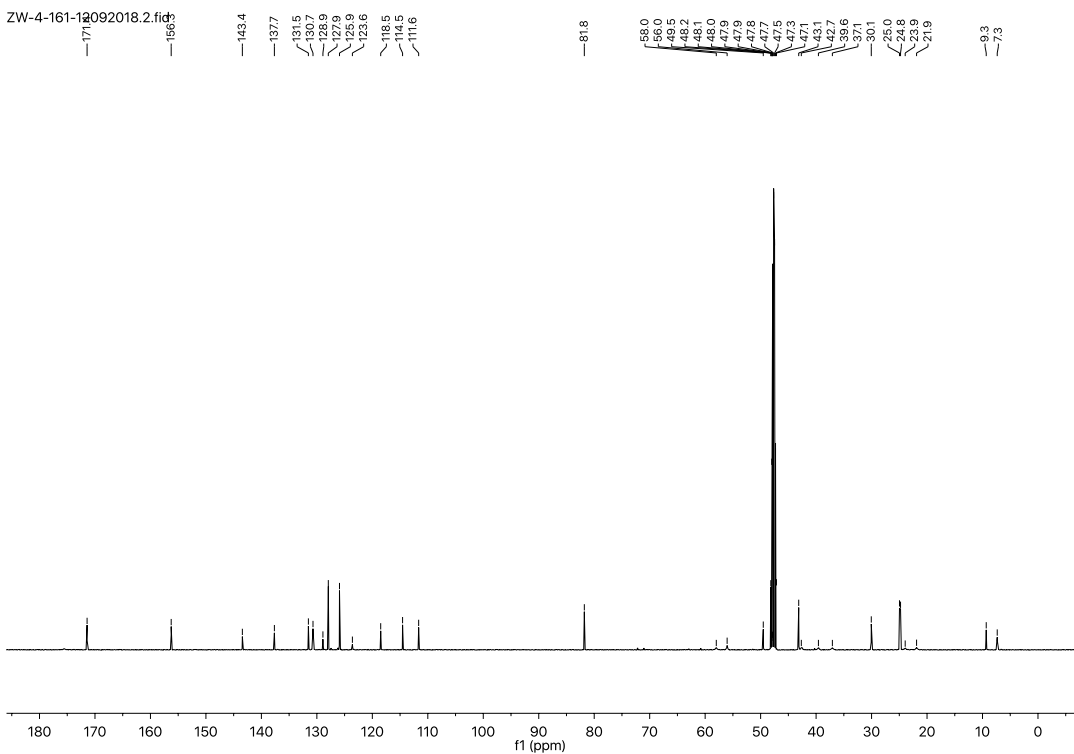

# <sup>1</sup>H NMR for compound 17

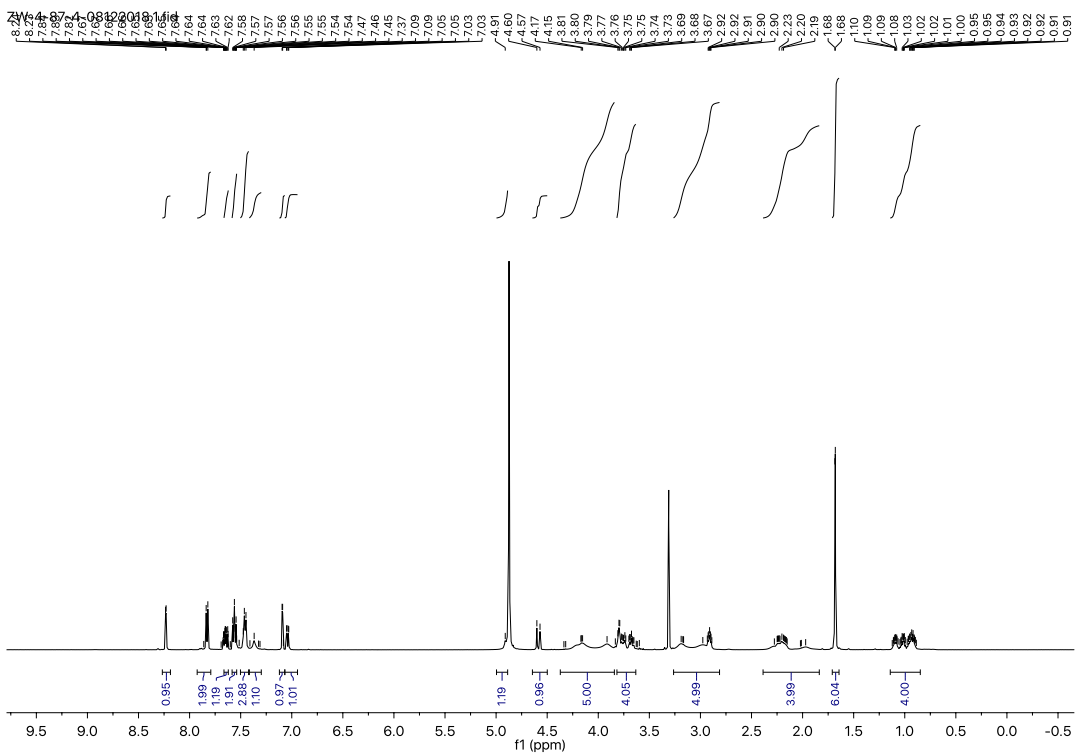

# <sup>13</sup>C NMR for compound 17

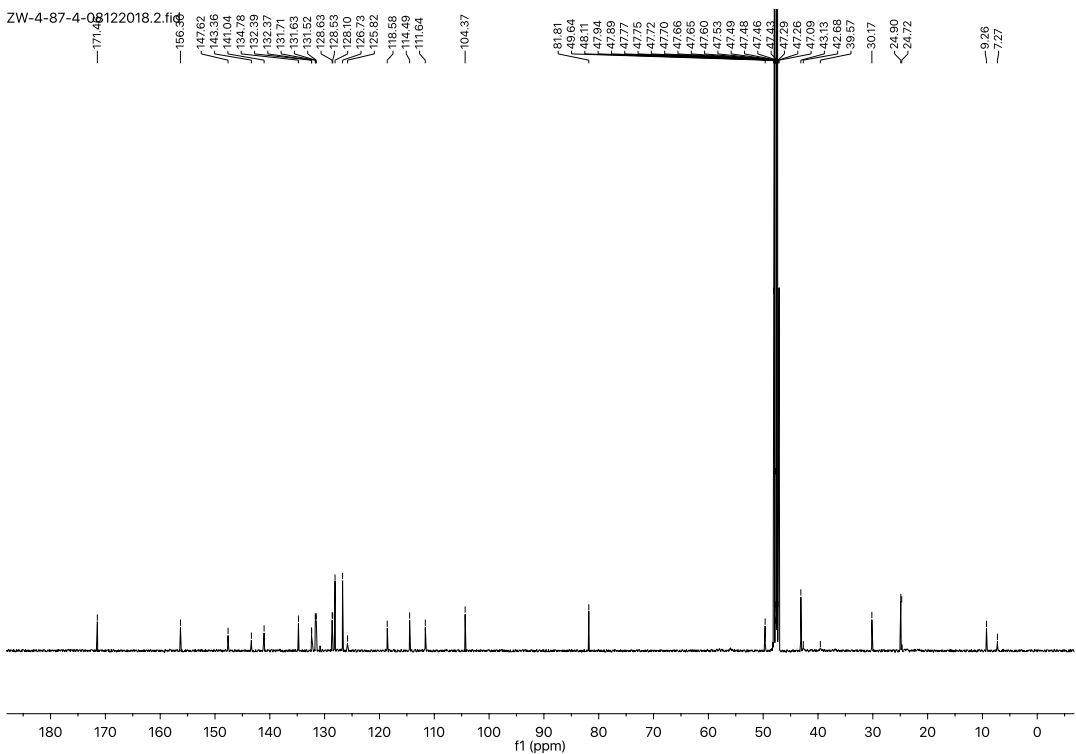

# <sup>1</sup>H NMR for compound 18

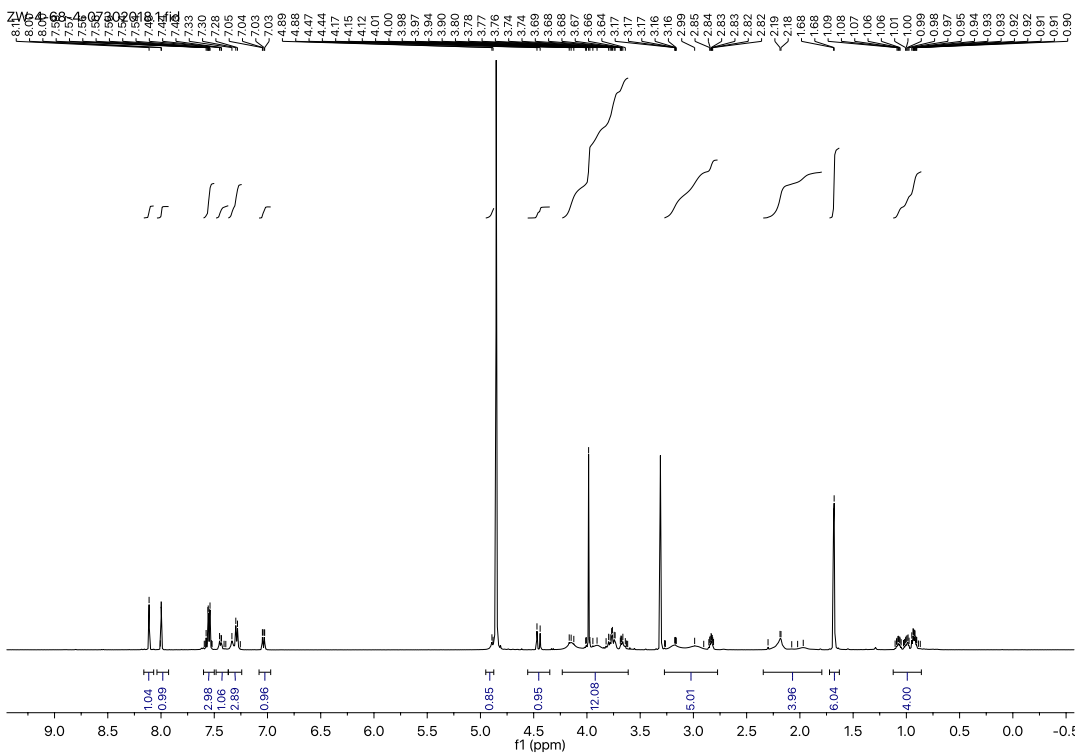

# <sup>13</sup>C NMR for compound 18

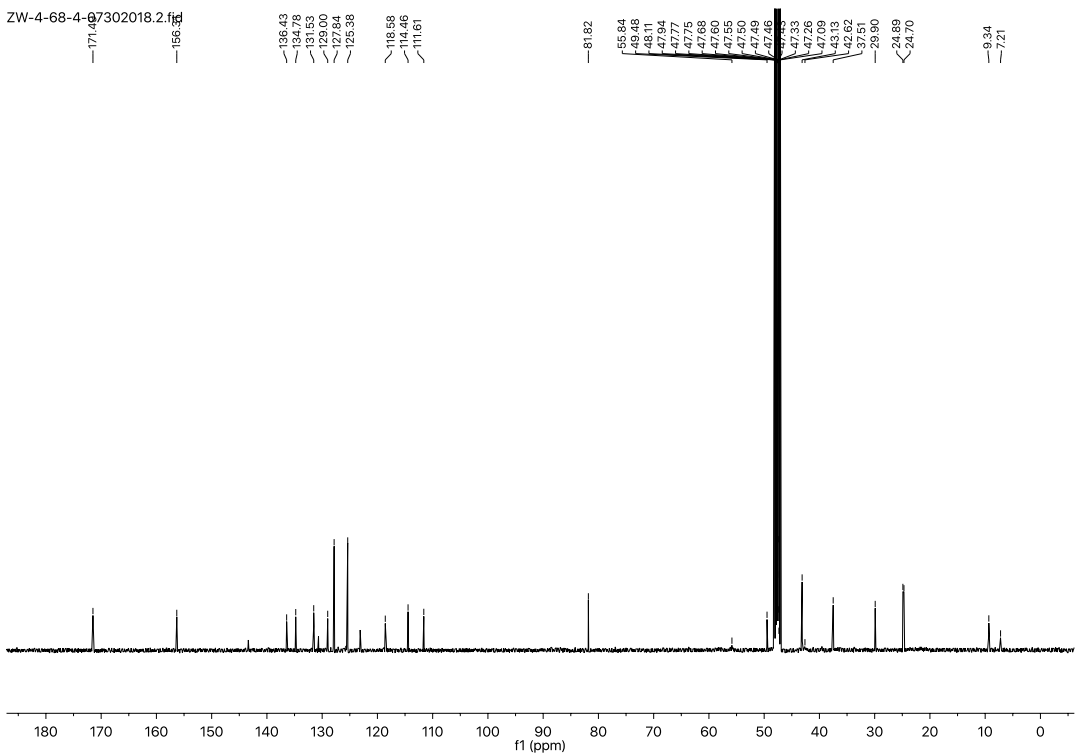

# <sup>1</sup>H NMR for compound 19

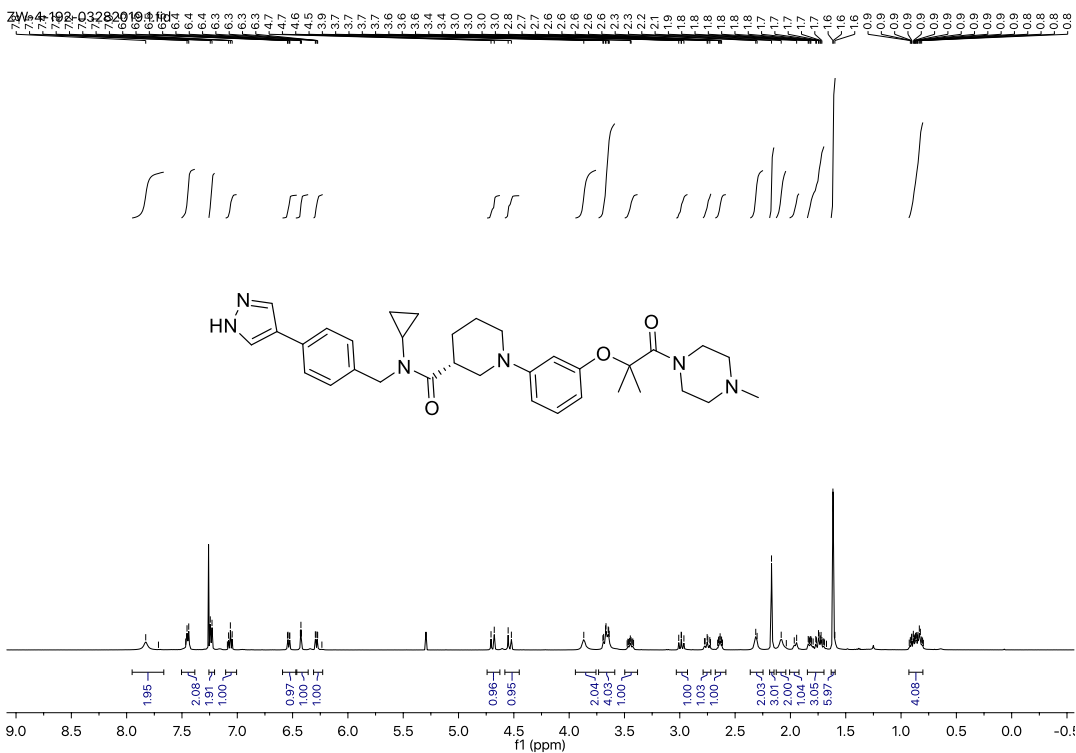

# <sup>13</sup>C NMR for compound 19

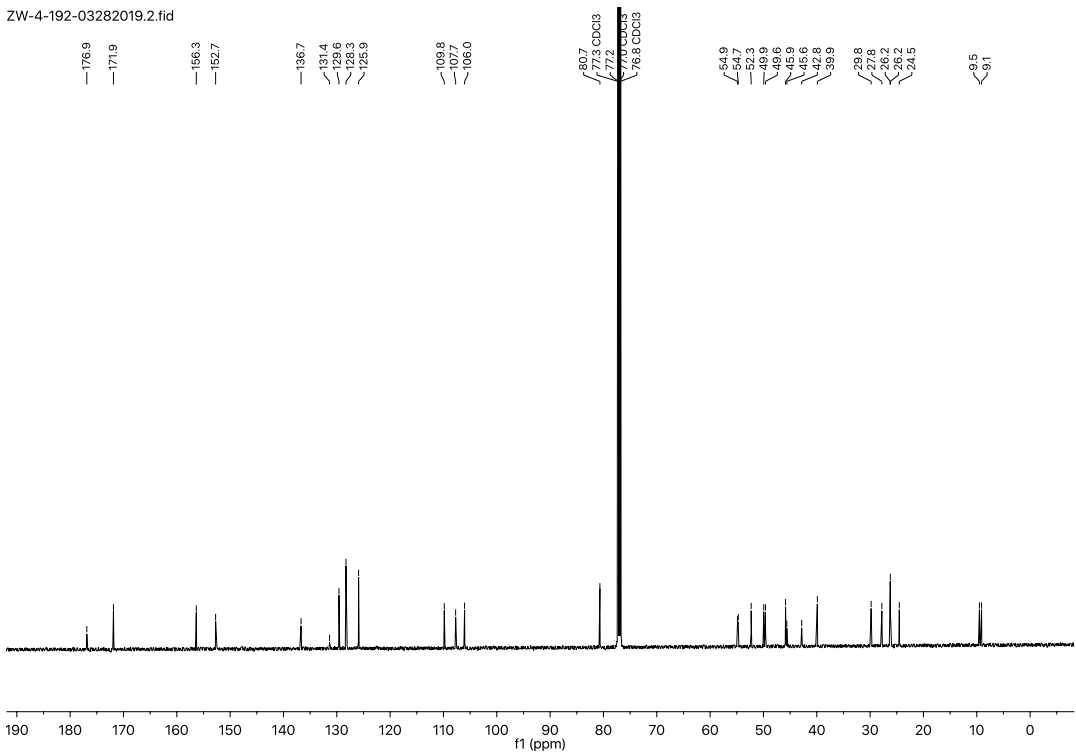



# <sup>1</sup>H NMR for compound 21

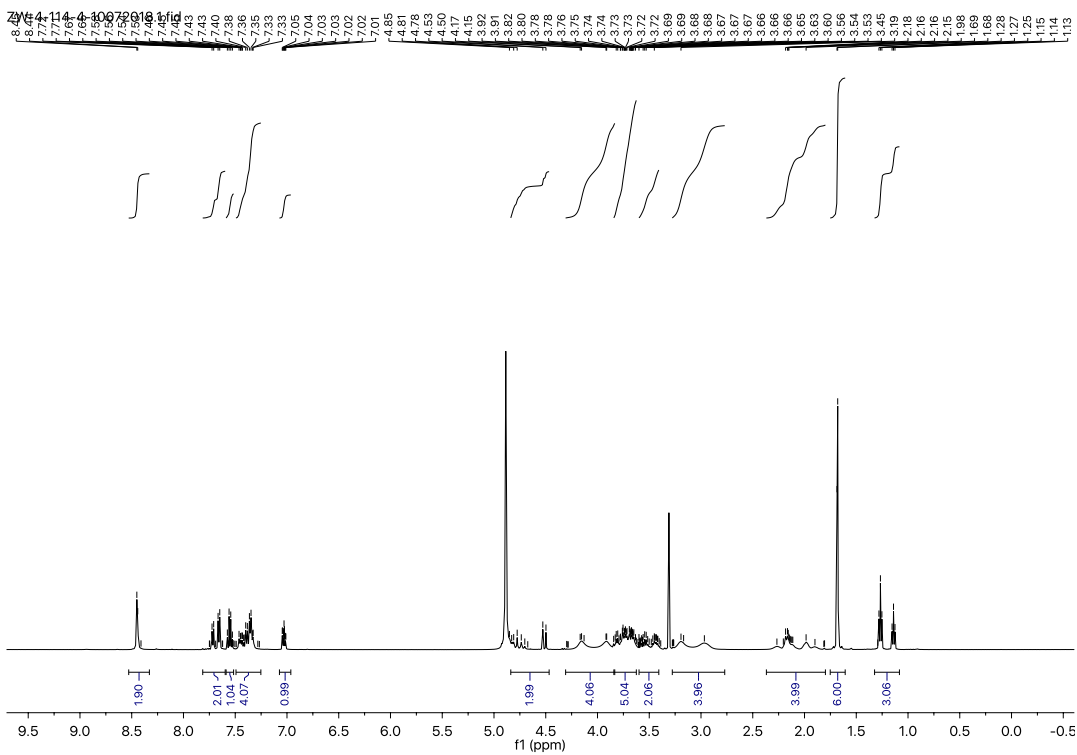

# <sup>13</sup>C NMR for compound 21

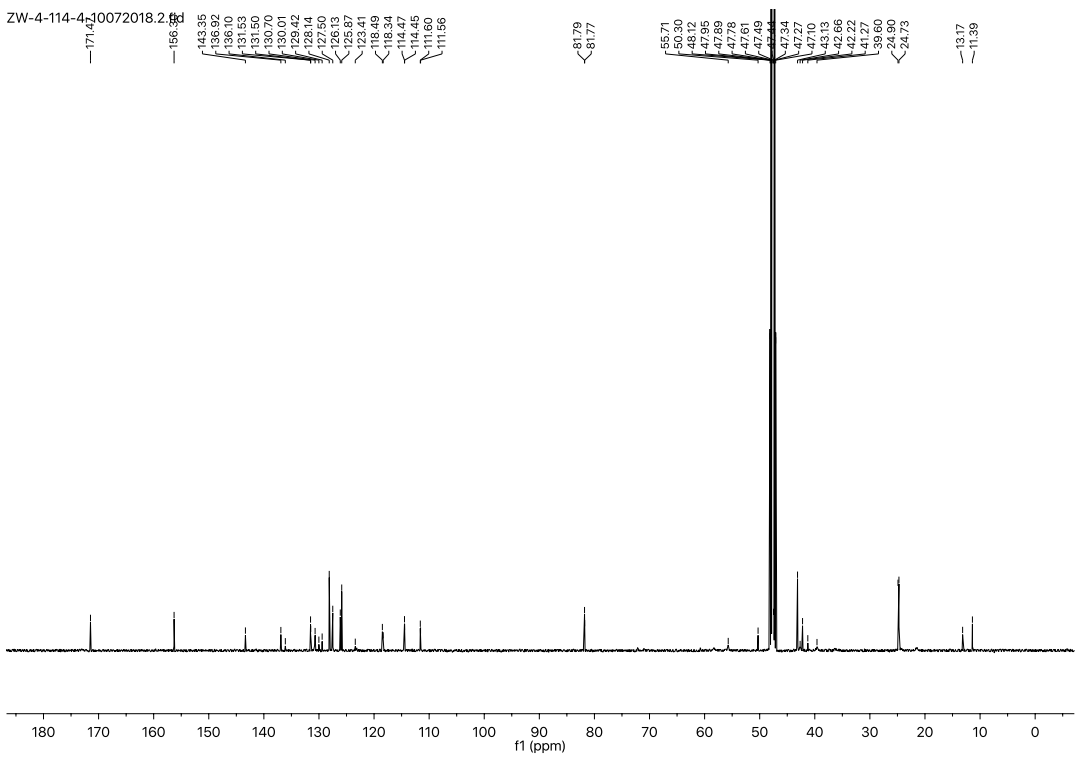

# <sup>1</sup>H NMR for compound 22

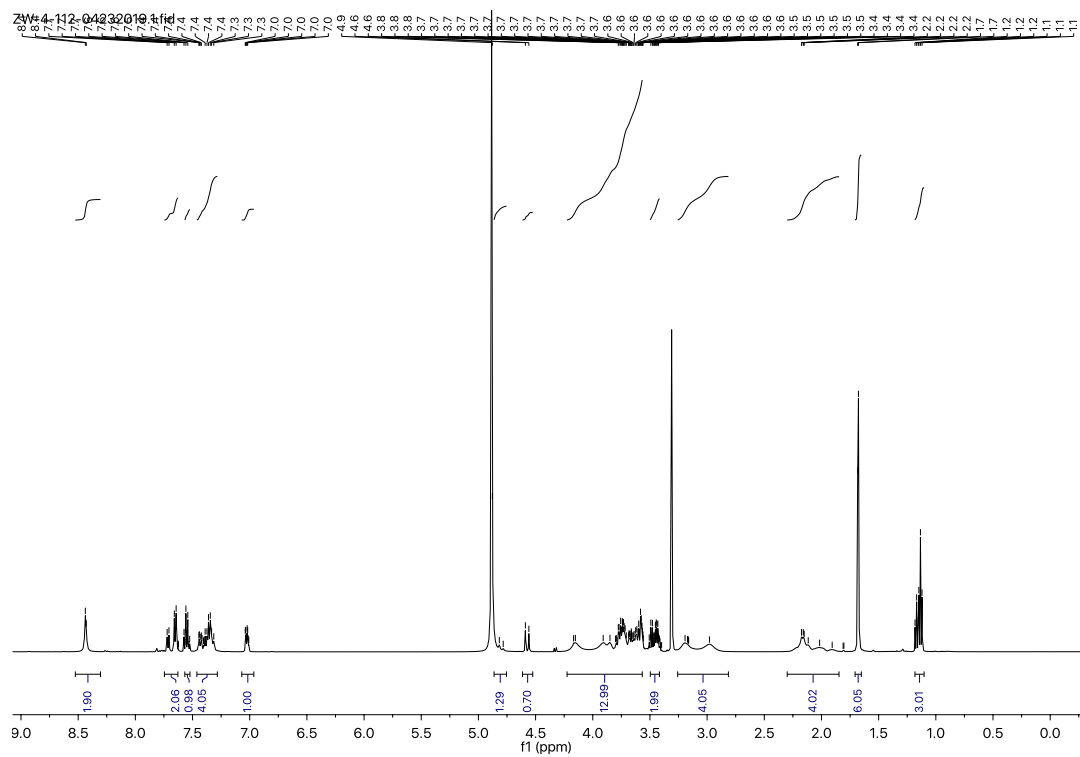

# <sup>13</sup>C NMR for compound 22

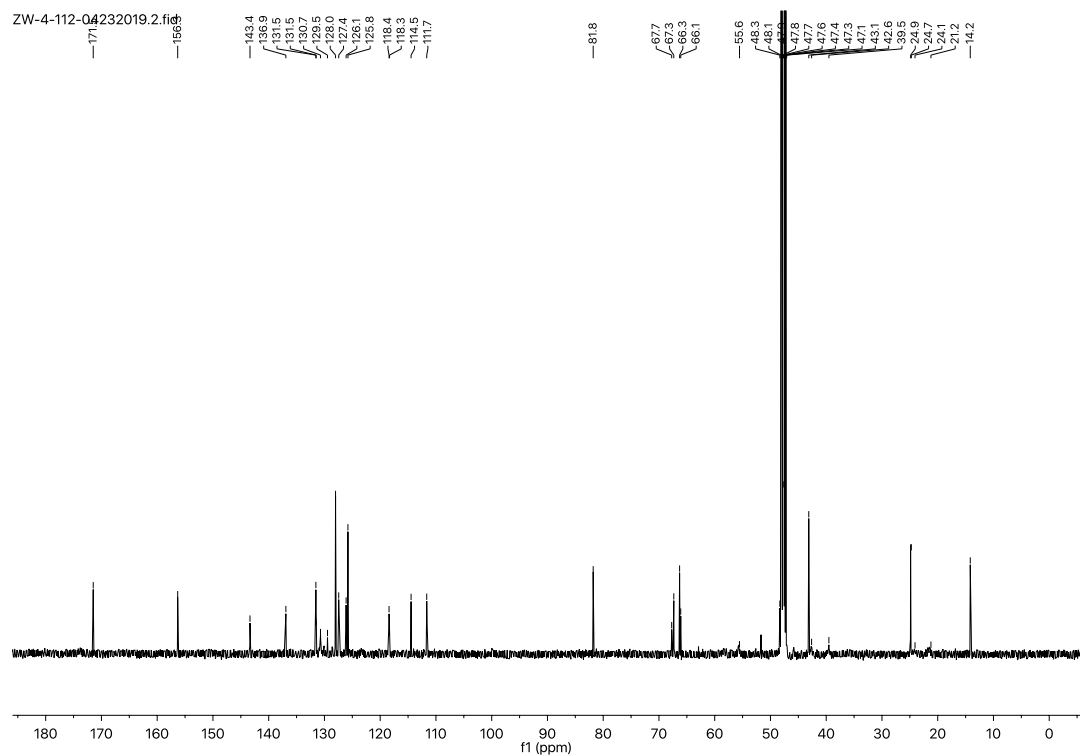



# <sup>1</sup>H NMR for compound **Biotin-ZW4864**

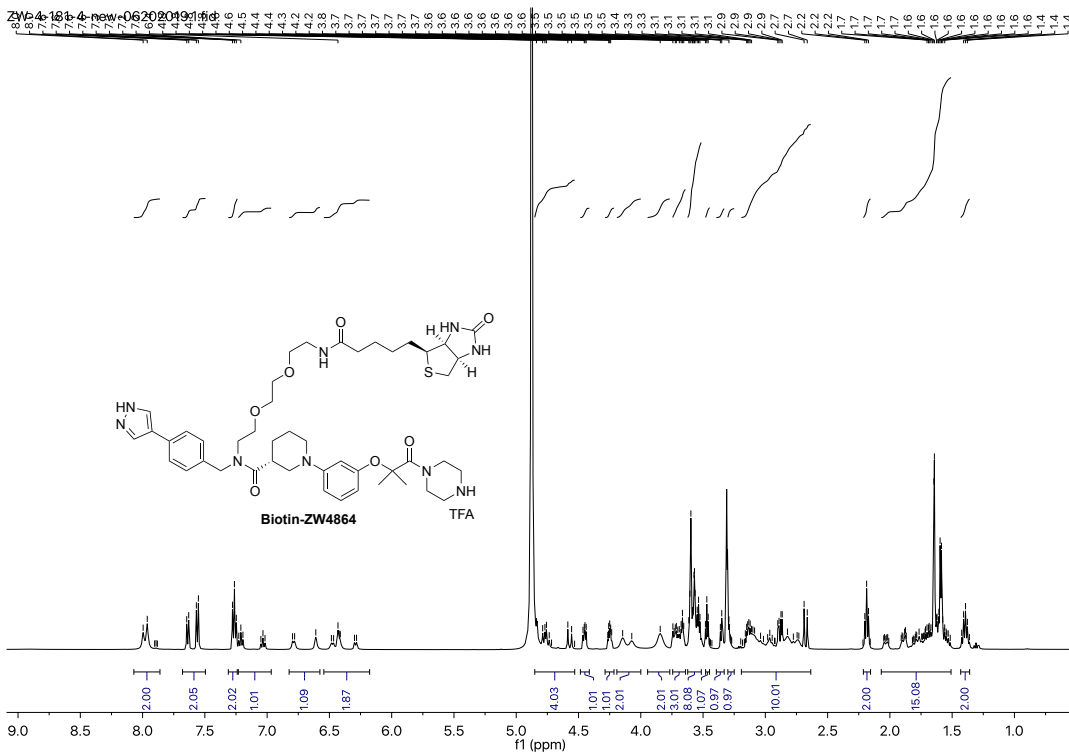

# <sup>13</sup>C NMR for compound **Biotin-ZW4864**

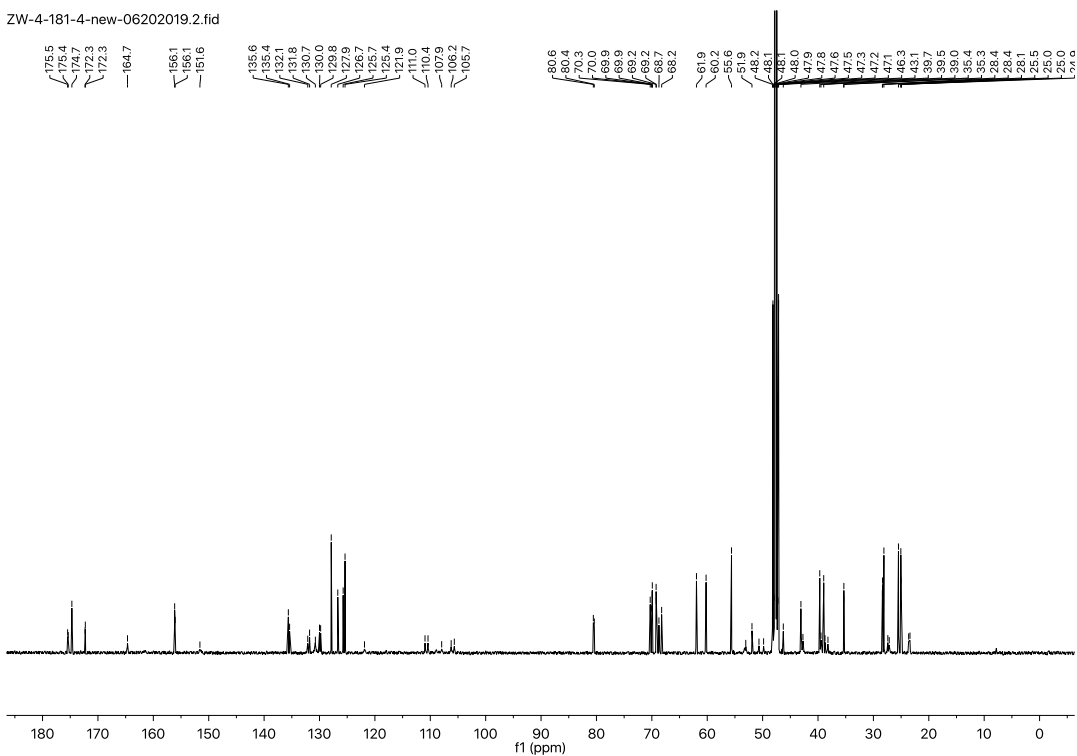

MDA-MB-231 vehicle control

BD FACSDiva 8.0.1

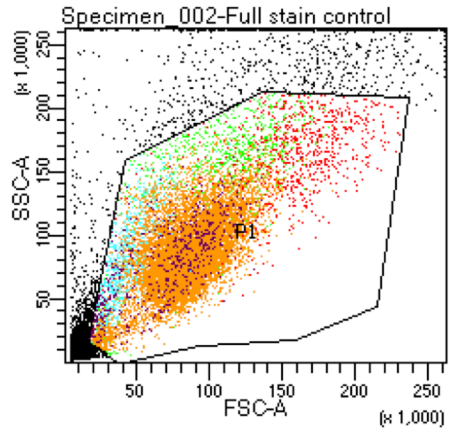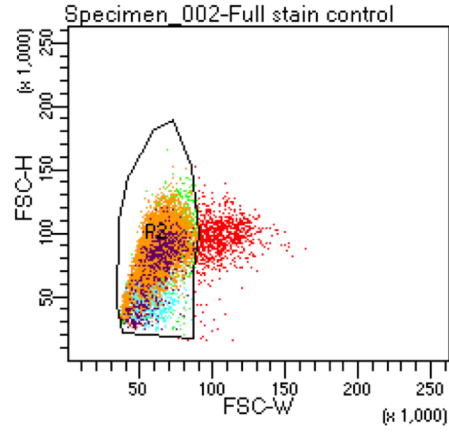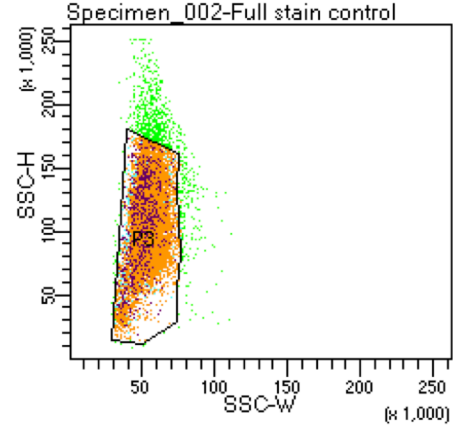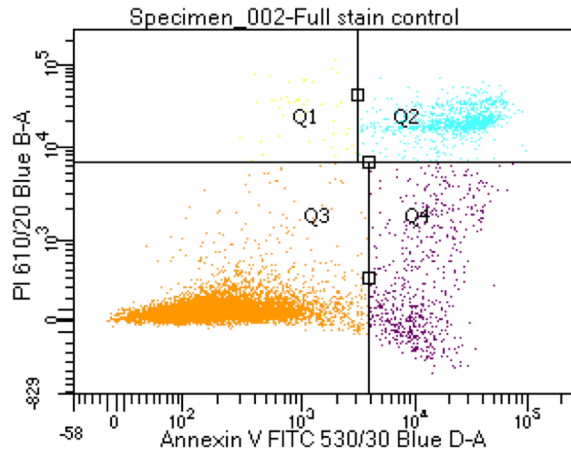

Tube: Full stain control

| Population | #Events | %Parent | %Total |
|------------|---------|---------|--------|
| All Events | 19,051  | ####    | 100.0  |
| P1         | 13,269  | 69.6    | 69.6   |
| P2         | 12,417  | 93.6    | 65.2   |
| P3         | 11,557  | 93.1    | 60.7   |
| Q1         | 45      | 0.4     | 0.2    |
| Q2         | 1,019   | 8.8     | 5.3    |
| Q3         | 9,883   | 85.5    | 51.9   |
| Q4         | 610     | 5.3     | 3.2    |

MDA-MB-231 10 uM ZW4864

BD FACSDiva 8.0.1

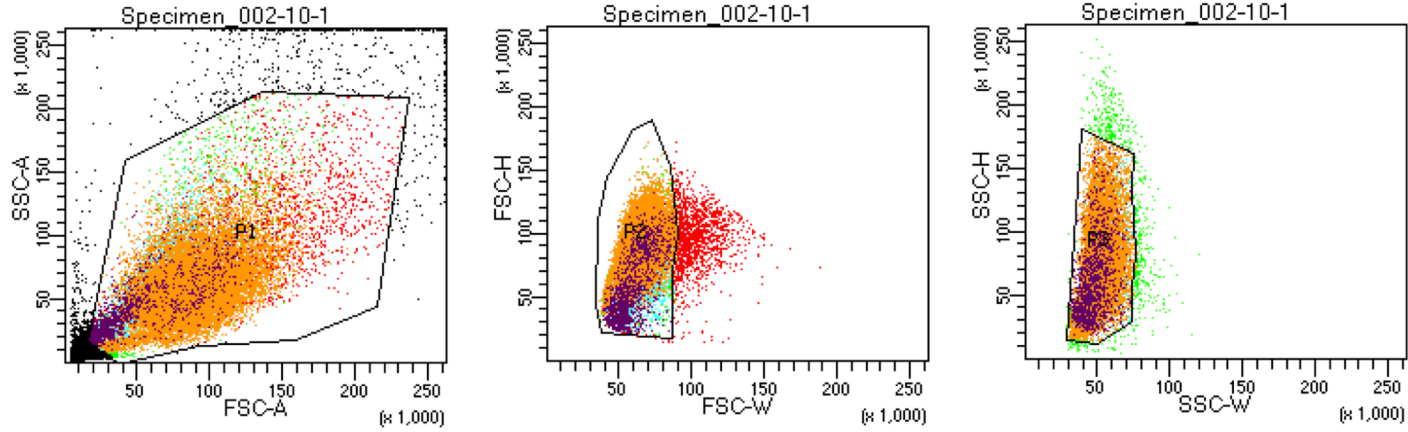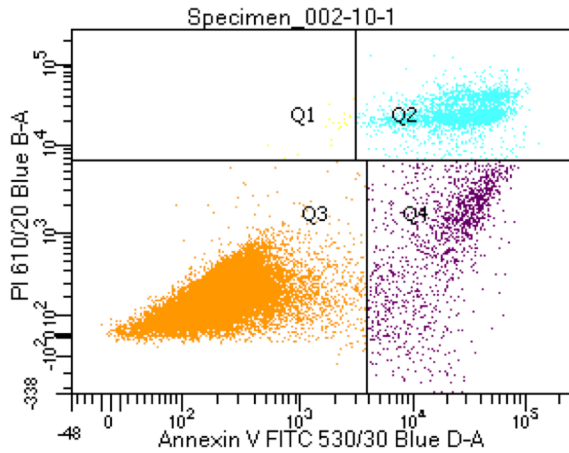

Tube: 10-1

| Population | #Events | %Parent | %Total |
|------------|---------|---------|--------|
| All Events | 35,804  | ####    | 100.0  |
| P1         | 26,380  | 73.7    | 73.7   |
| P2         | 24,902  | 94.4    | 69.6   |
| P3         | 24,254  | 97.4    | 67.7   |
| Q1         | 22      | 0.1     | 0.1    |
| Q2         | 2,961   | 12.2    | 8.3    |
| Q3         | 19,965  | 82.3    | 55.8   |
| Q4         | 1,306   | 5.4     | 3.6    |

MDA-MB-231 20 uM ZW4864

BD FACSDiva 8.0.1

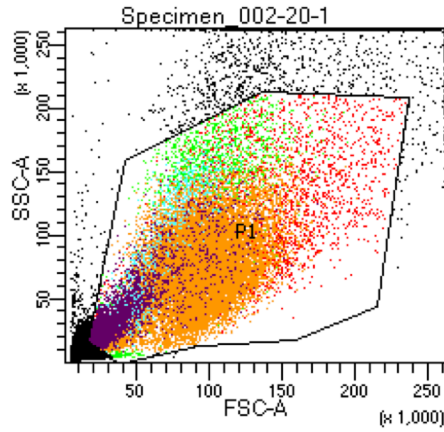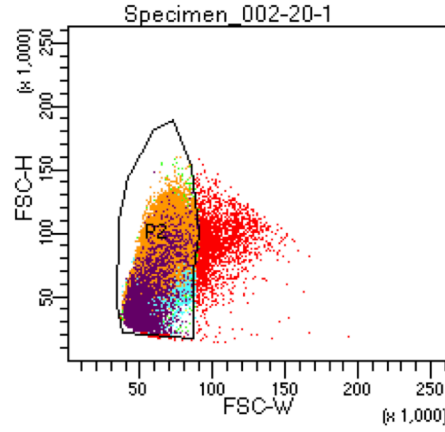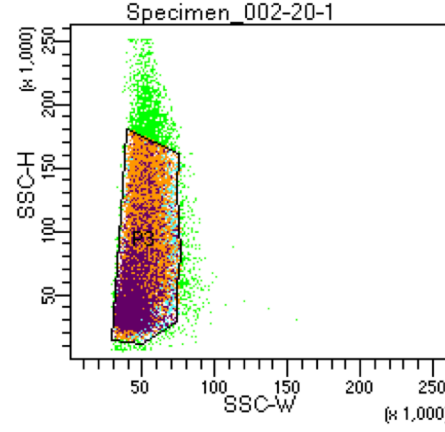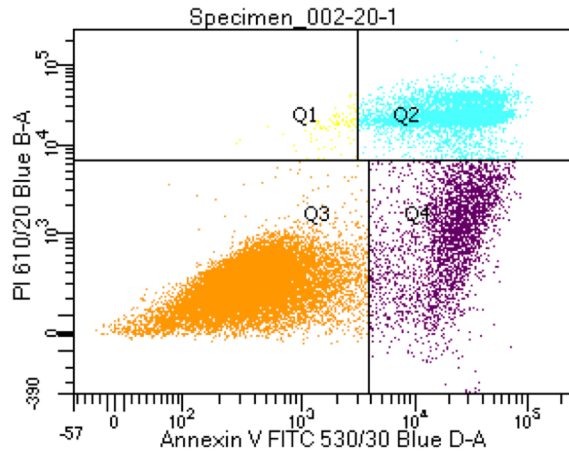

Tube: 20-1

| Population | #Events | %Parent | %Total |
|------------|---------|---------|--------|
| All Events | 43,344  | ####    | 100.0  |
| P1         | 26,462  | 61.1    | 61.1   |
| P2         | 24,116  | 91.1    | 55.6   |
| P3         | 22,351  | 92.7    | 51.6   |
| Q1         | 92      | 0.4     | 0.2    |
| Q2         | 5,147   | 23.0    | 11.9   |
| Q3         | 14,116  | 63.2    | 32.6   |
| Q4         | 2,996   | 13.4    | 6.9    |

MDA-MB-231 40 uM ZW4864

BD FACSDiva 8.0.1

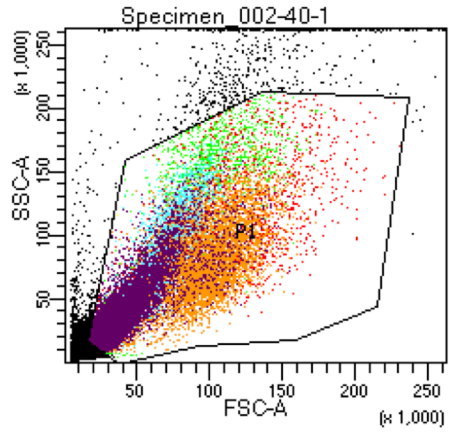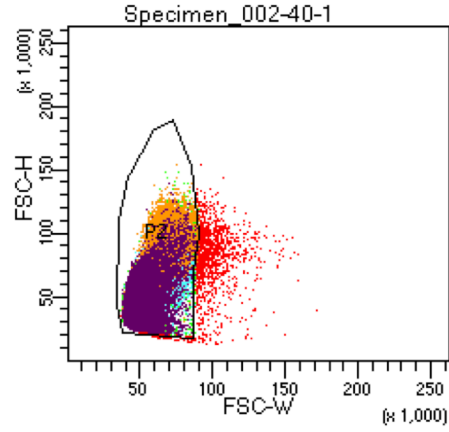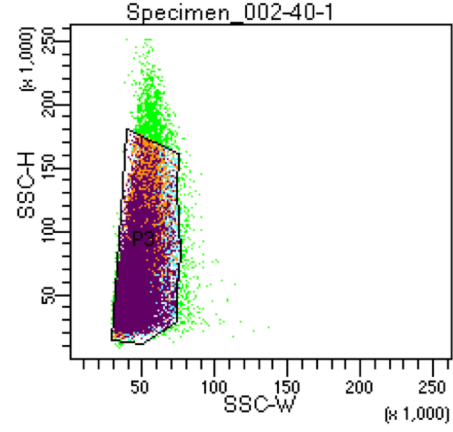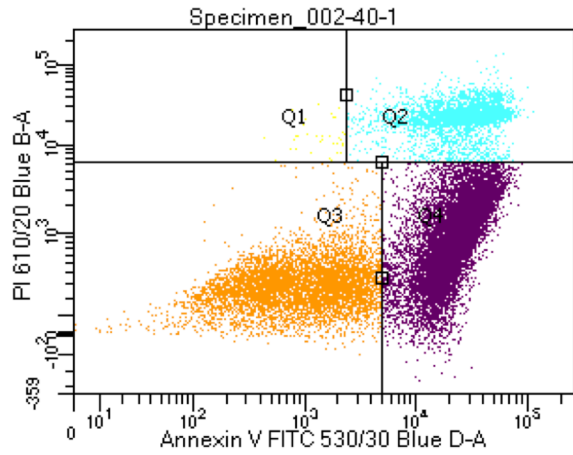

Tube: 40-1

| Population | #Events | %Parent | %Total |
|------------|---------|---------|--------|
| All Events | 76,090  | ####    | 100.0  |
| P1         | 25,557  | 33.6    | 33.6   |
| P2         | 24,118  | 94.4    | 31.7   |
| P3         | 22,555  | 93.5    | 29.6   |
| Q1         | 35      | 0.2     | 0.0    |
| Q2         | 4,252   | 18.9    | 5.6    |
| Q3         | 6,281   | 27.8    | 8.3    |
| Q4         | 11,987  | 53.1    | 15.8   |

MDA-MB-468 vehicle control

BD FACSDiva 8.0.1

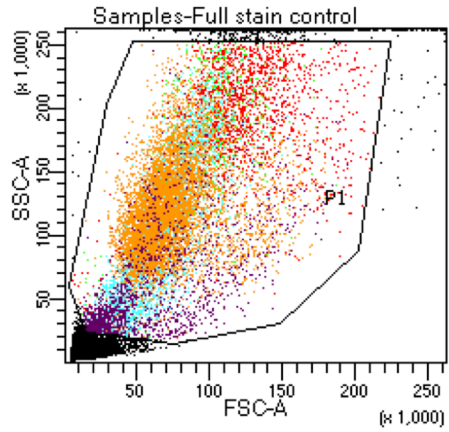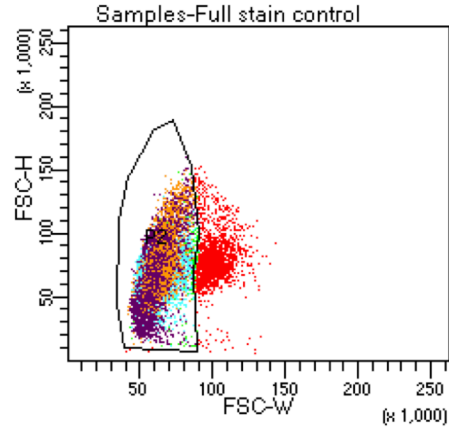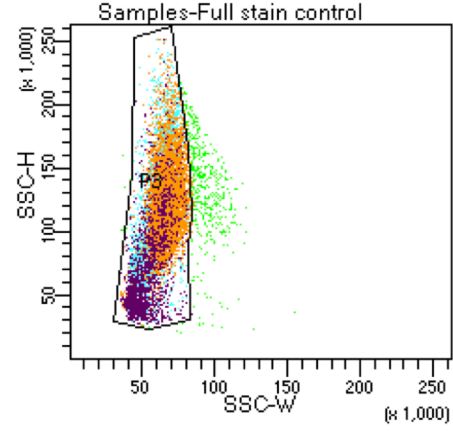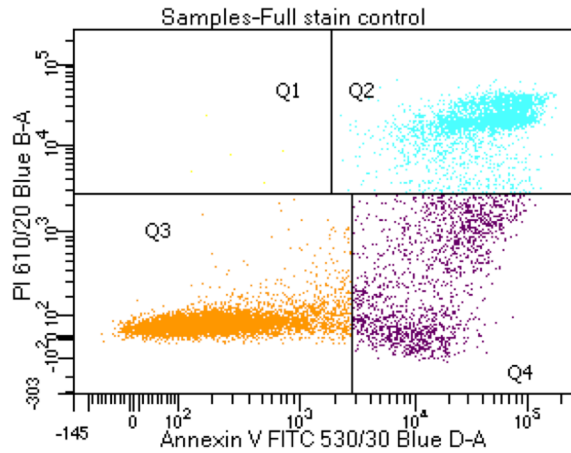

Tube: Full stain control

| Population | #Events | %Parent | %Total |
|------------|---------|---------|--------|
| All Events | 22,537  | ####    | 100.0  |
| P1         | 13,648  | 60.6    | 60.6   |
| P2         | 11,824  | 86.6    | 52.5   |
| P3         | 11,370  | 96.2    | 50.5   |
| Q1         | 5       | 0.0     | 0.0    |
| Q2         | 3,288   | 28.9    | 14.6   |
| Q3         | 6,492   | 57.1    | 28.8   |
| Q4         | 1,585   | 13.9    | 7.0    |

MDA-MB-468 10 uM ZW4864

BD FACSDiva 8.0.1

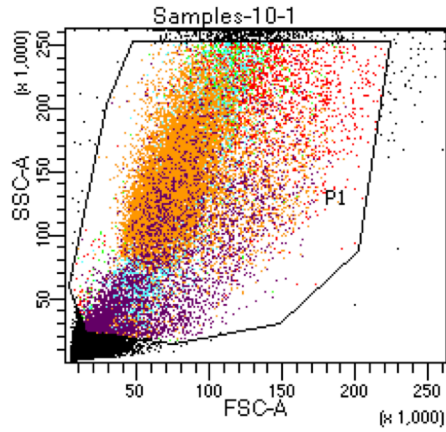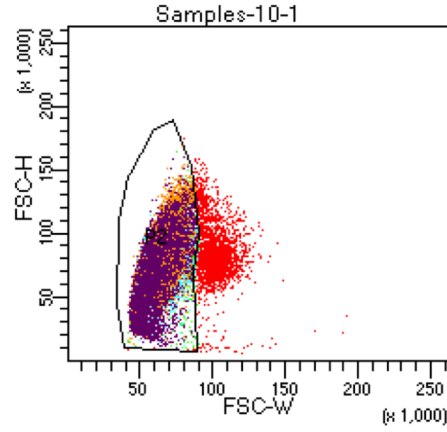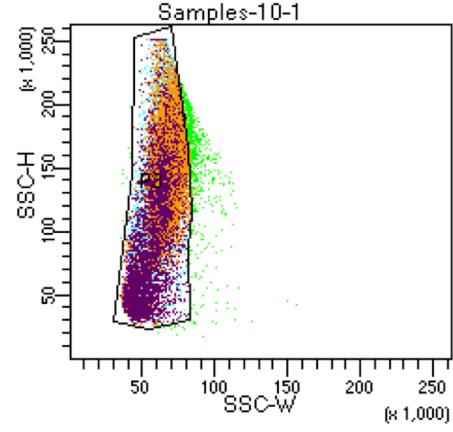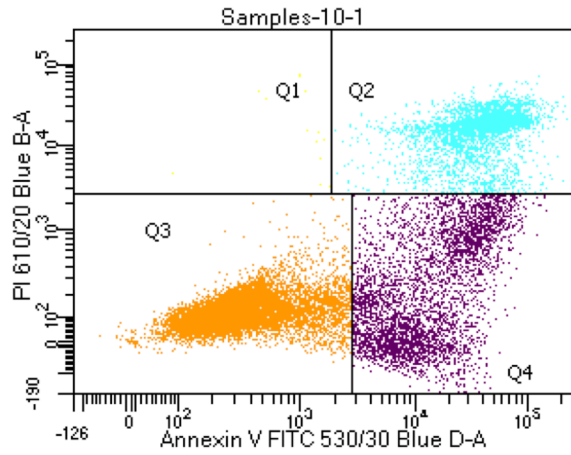

Tube: 10-1

| Population | #Events | %Parent | %Total |
|------------|---------|---------|--------|
| All Events | 44,726  | ####    | 100.0  |
| P1         | 25,283  | 56.5    | 56.5   |
| P2         | 22,969  | 90.8    | 51.4   |
| P3         | 22,306  | 97.1    | 49.9   |
| Q1         | 13      | 0.1     | 0.0    |
| Q2         | 3,925   | 17.6    | 8.8    |
| Q3         | 14,460  | 64.8    | 32.3   |
| Q4         | 3,908   | 17.5    | 8.7    |

MDA-MB-468 20 uM ZW4864

BD FACSDiva 8.0.1

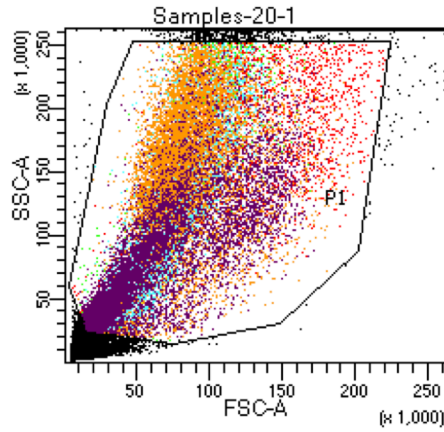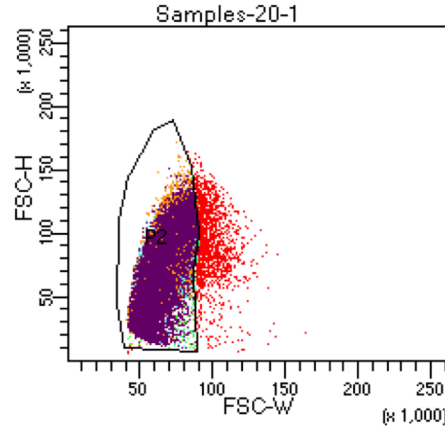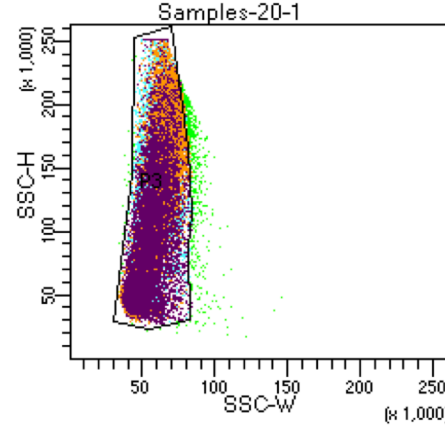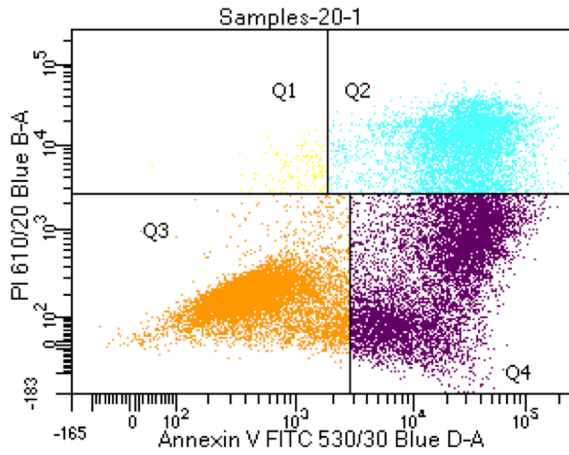

| Tube: 20-1 |         |         |        |
|------------|---------|---------|--------|
| Population | #Events | %Parent | %Total |
| All Events | 46,880  | ####    | 100.0  |
| P1         | 25,581  | 54.6    | 54.6   |
| P2         | 23,954  | 93.6    | 51.1   |
| P3         | 23,353  | 97.5    | 49.8   |
| Q1         | 126     | 0.5     | 0.3    |
| Q2         | 5,735   | 24.6    | 12.2   |
| Q3         | 9,406   | 40.3    | 20.1   |
| Q4         | 8,086   | 34.6    | 17.2   |



MDA-MB-468 40 uM ZW4864

BD FACSDiva 8.0.1

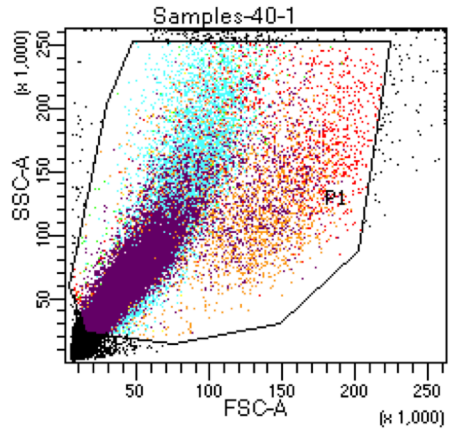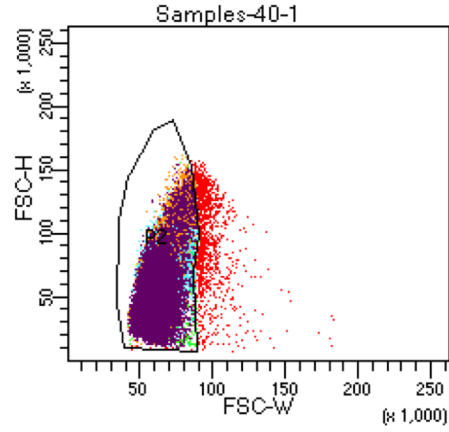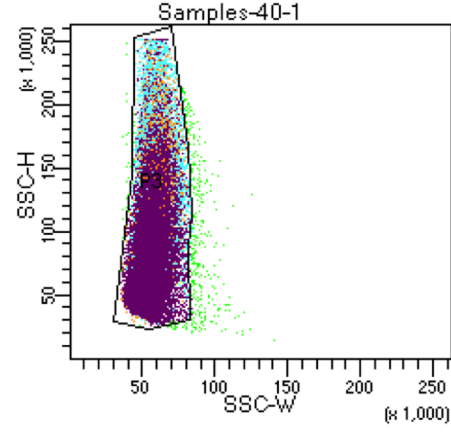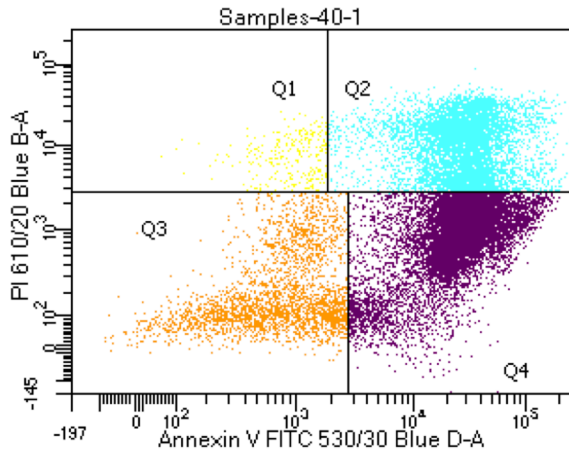

Tube: 40-1

| Population | #Events | %Parent | %Total |
|------------|---------|---------|--------|
| All Events | 40,946  | ####    | 100.0  |
| P1         | 24,454  | 59.7    | 59.7   |
| P2         | 23,221  | 95.0    | 56.7   |
| P3         | 22,813  | 98.2    | 55.7   |
| Q1         | 281     | 1.2     | 0.7    |
| Q2         | 7,609   | 33.4    | 18.6   |
| Q3         | 2,712   | 11.9    | 6.6    |
| Q4         | 12,211  | 53.5    | 29.8   |

# MCF10A vehicle control

BD FACSDiva 8.0.1

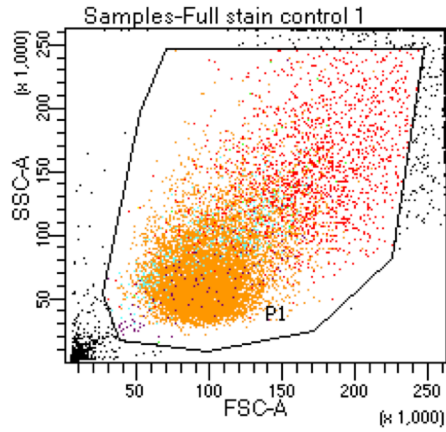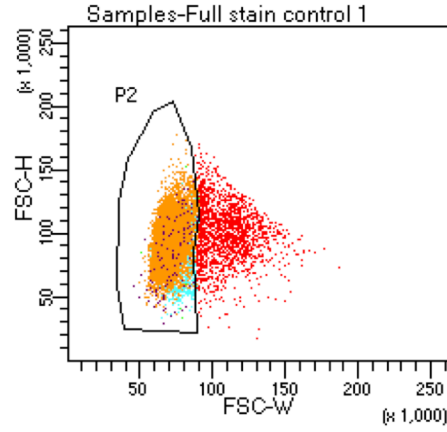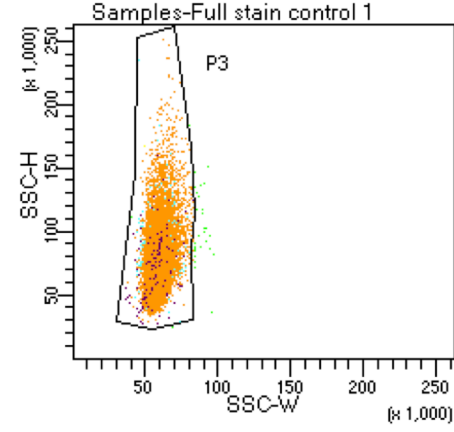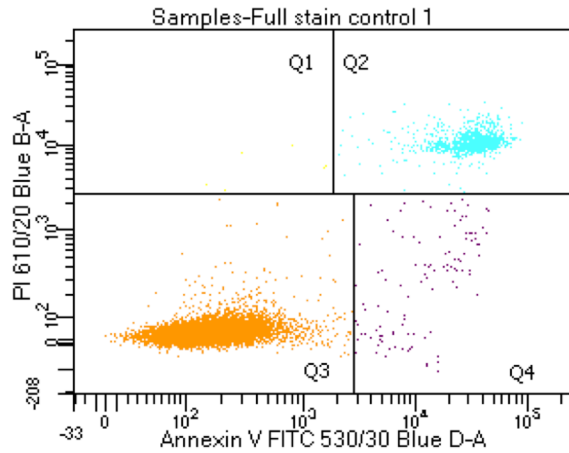

Tube: Full stain control 1

| Population | #Events | %Parent | %Total |
|------------|---------|---------|--------|
| All Events | 13,566  | ####    | 100.0  |
| P1         | 11,809  | 87.0    | 87.0   |
| P2         | 10,036  | 85.0    | 74.0   |
| P3         | 10,000  | 99.6    | 73.7   |
| Q1         | 6       | 0.1     | 0.0    |
| Q2         | 1,263   | 12.6    | 9.3    |
| Q3         | 8,620   | 86.2    | 63.5   |
| Q4         | 111     | 1.1     | 0.8    |

MCF10A 10 uM ZW4864

BD FACSDiva 8.0.1

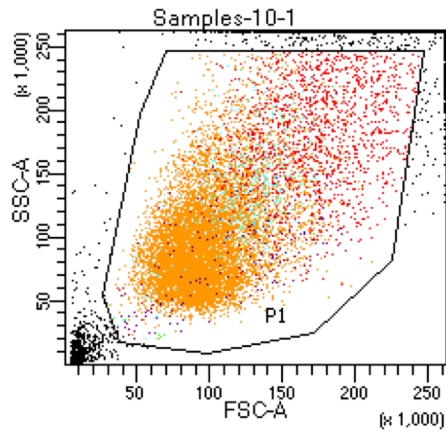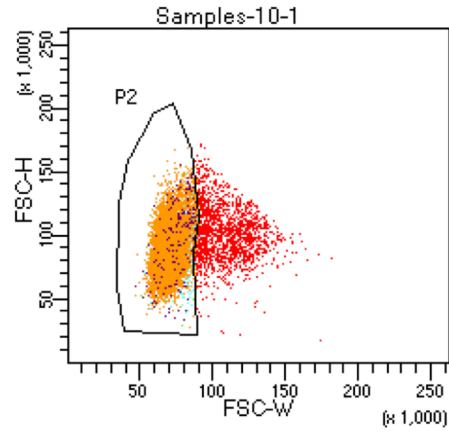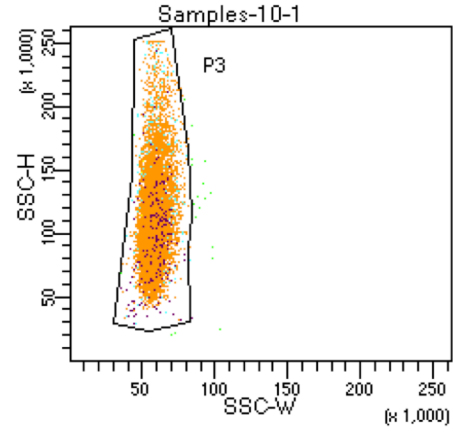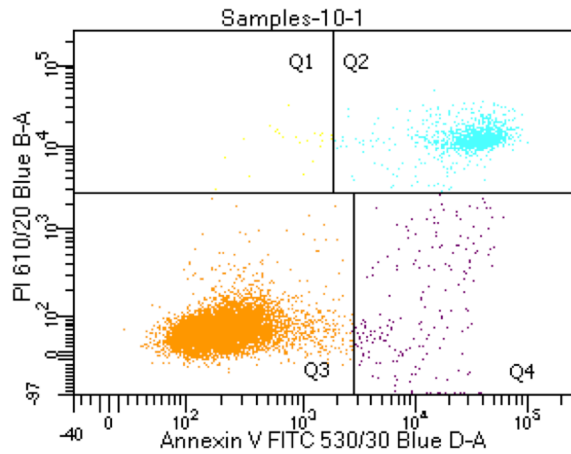

Tube: 10-1

| Population | #Events | %Parent | %Total |
|------------|---------|---------|--------|
| All Events | 14,805  | ####    | 100.0  |
| P1         | 11,754  | 79.4    | 79.4   |
| P2         | 10,102  | 85.9    | 68.2   |
| P3         | 10,082  | 99.8    | 68.1   |
| Q1         | 24      | 0.2     | 0.2    |
| Q2         | 1,238   | 12.3    | 8.4    |
| Q3         | 8,628   | 85.6    | 58.3   |
| Q4         | 192     | 1.9     | 1.3    |

MCF10A 20 uM ZW4864

BD FACSDiva 8.0.1

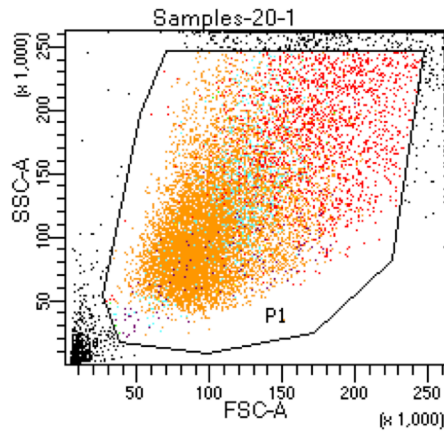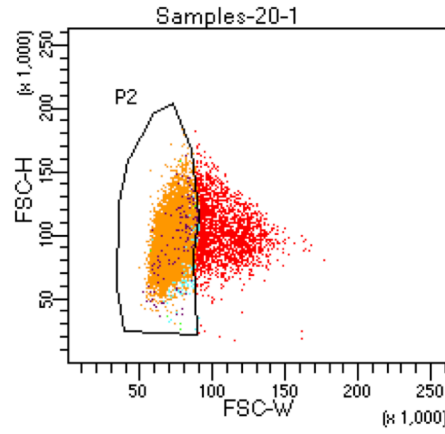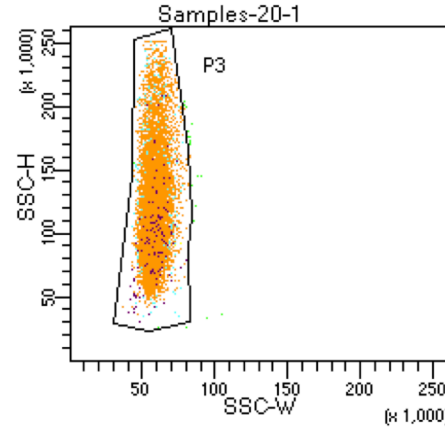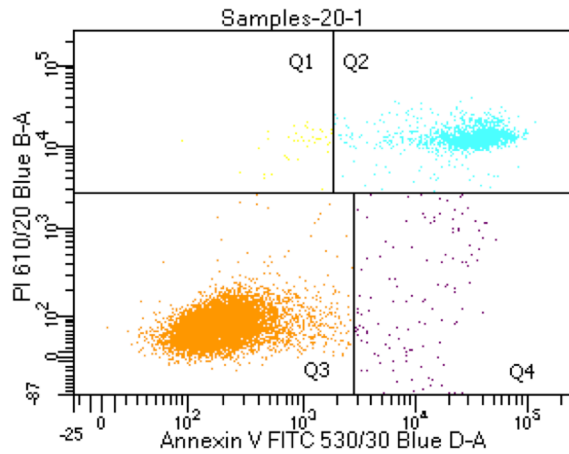

Tube: 20-1

| Population | #Events | %Parent | %Total |
|------------|---------|---------|--------|
| All Events | 15,847  | ####    | 100.0  |
| P1         | 12,108  | 76.4    | 76.4   |
| P2         | 10,022  | 82.8    | 63.2   |
| P3         | 10,000  | 99.8    | 63.1   |
| Q1         | 40      | 0.4     | 0.3    |
| Q2         | 1,726   | 17.3    | 10.9   |
| Q3         | 8,107   | 81.1    | 51.2   |
| Q4         | 127     | 1.3     | 0.8    |

MCF10A 40 uM ZW4864

BD FACSDiva 8.0.1

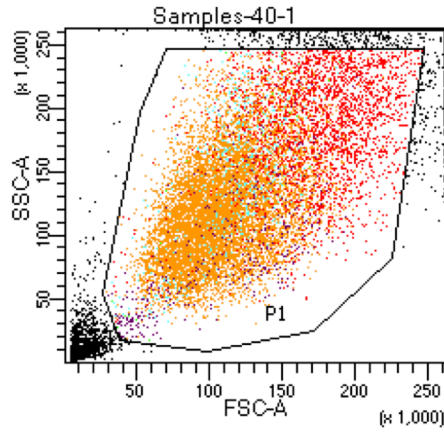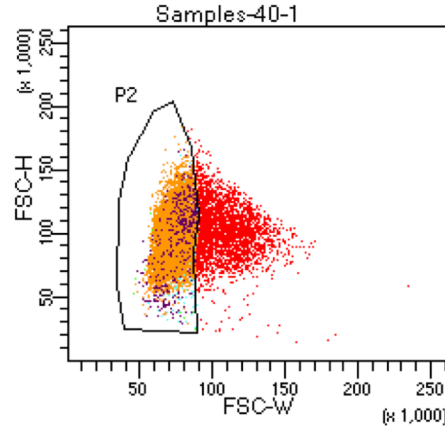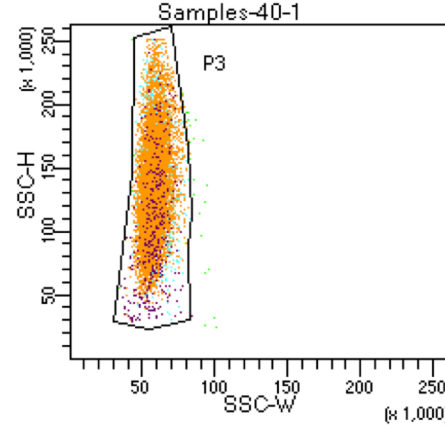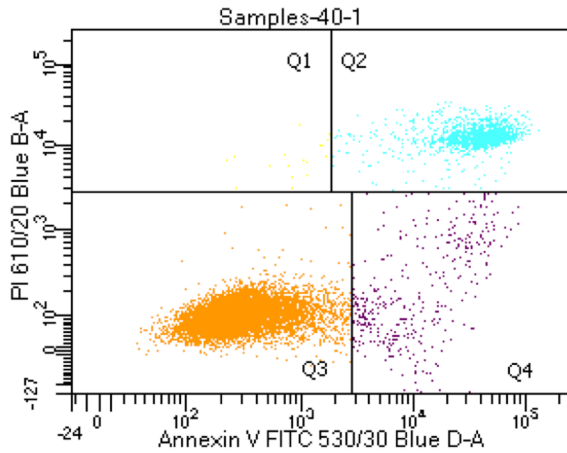

Tube: 40-1

| Population | #Events | %Parent | %Total |
|------------|---------|---------|--------|
| All Events | 18,450  | ####    | 100.0  |
| P1         | 13,209  | 71.6    | 71.6   |
| P2         | 10,034  | 76.0    | 54.4   |
| P3         | 10,000  | 99.7    | 54.2   |
| Q1         | 17      | 0.2     | 0.1    |
| Q2         | 1,528   | 15.3    | 8.3    |
| Q3         | 8,068   | 80.7    | 43.7   |
| Q4         | 387     | 3.9     | 2.1    |
